# Supplementary material for: Oral anticoagulation therapy use in patients with atrial fibrillation after the introduction of non-vitamin K antagonist oral anticoagulants: findings from the French healthcare databases, 2011–2016
Source: PubMed Central journal article supplement — BMJ Open. 2019 Apr 20;9(4):e026645. doi: 10.1136/bmjopen-2018-026645 (PMC6500377; doi:10.1136/bmjopen-2018-026645), 2019-04-20
Supplement: bmjopen-2018-026645.draft_revisions.pdf [file bmjopen-2018-026645.draft_revisions.pdf]

# BMJ Open

BMJ Open is committed to open peer review. As part of this commitment we make the peer review history of every article we publish publicly available.

When an article is published we post the peer reviewers' comments and the authors' responses online. We also post the versions of the paper that were used during peer review. These are the versions that the peer review comments apply to.

The versions of the paper that follow are the versions that were submitted during the peer review process. They are not the versions of record or the final published versions. They should not be cited or distributed as the published version of this manuscript.

BMJ Open is an open access journal and the full, final, typeset and author-corrected version of record of the manuscript is available on our site with no access controls, subscription charges or pay-per-view fees (<http://bmjopen.bmj.com>).

If you have any questions on BMJ Open's open peer review process please email [info.bmjopen@bmj.com](mailto:info.bmjopen@bmj.com)

# BMJ Open

## Oral anticoagulation therapy use in patients with atrial fibrillation after the introduction of direct oral anticoagulants: findings from the French healthcare databases, 2011-2016.

|                               |                                                                                                                                                                                                                                                                                                                                                                                                                                                                                                                                                                                                                                                                                                                                                                                                                                                                                                                                                                             |
|-------------------------------|-----------------------------------------------------------------------------------------------------------------------------------------------------------------------------------------------------------------------------------------------------------------------------------------------------------------------------------------------------------------------------------------------------------------------------------------------------------------------------------------------------------------------------------------------------------------------------------------------------------------------------------------------------------------------------------------------------------------------------------------------------------------------------------------------------------------------------------------------------------------------------------------------------------------------------------------------------------------------------|
| Journal:                      | <i>BMJ Open</i>                                                                                                                                                                                                                                                                                                                                                                                                                                                                                                                                                                                                                                                                                                                                                                                                                                                                                                                                                             |
| Manuscript ID                 | bmjopen-2018-026645                                                                                                                                                                                                                                                                                                                                                                                                                                                                                                                                                                                                                                                                                                                                                                                                                                                                                                                                                         |
| Article Type:                 | Research                                                                                                                                                                                                                                                                                                                                                                                                                                                                                                                                                                                                                                                                                                                                                                                                                                                                                                                                                                    |
| Date Submitted by the Author: | 12-Sep-2018                                                                                                                                                                                                                                                                                                                                                                                                                                                                                                                                                                                                                                                                                                                                                                                                                                                                                                                                                                 |
| Complete List of Authors:     | MAURA, Géric; French National Health Insurance (Caisse Nationale de l'Assurance Maladie/Cnam), Department of Studies in Public Health; University of Bordeaux, Inserm, Bordeaux Population Health Research Center, team Pharmacoepidemiology - UMR 1219, Billionnet, Cécile; French National Health Insurance (Caisse Nationale de l'Assurance Maladie/Cnam), Department of Studies in Public Health Drouin, Jérôme; French National Health Insurance (Caisse Nationale de l'Assurance Maladie/Cnam), Department of Studies in Public Health Weill, Alain; French National Health Insurance (Caisse Nationale de l'Assurance Maladie/Cnam), Department of Studies in Public Health Neumann, Anke; French National Health Insurance (Caisse Nationale de l'Assurance Maladie/Cnam), Department of Studies in Public Health Pariente, Antoine; University of Bordeaux, Inserm, Bordeaux Population Health Research Center, team Pharmacoepidemiology - UMR 1219; CHU Bordeaux |
| Keywords:                     | Anticoagulation < HAEMATOLOGY, Adult cardiology < CARDIOLOGY, EPIDEMIOLOGY, PUBLIC HEALTH, Thromboembolism < CARDIOLOGY                                                                                                                                                                                                                                                                                                                                                                                                                                                                                                                                                                                                                                                                                                                                                                                                                                                     |
|                               |                                                                                                                                                                                                                                                                                                                                                                                                                                                                                                                                                                                                                                                                                                                                                                                                                                                                                                                                                                             |

SCHOLARONE™  
Manuscripts

**Title page**

**Oral anticoagulation therapy use in patients with atrial fibrillation after the introduction of direct oral anticoagulants: findings from the French healthcare databases, 2011-2016.**

**Running title:** Patterns of OAC use

Géric Maura PharmD<sup>1,2</sup>, Cécile Billionnet MSc, PhD<sup>1</sup>, Jérôme Drouin, MSc<sup>1</sup>, Alain Weill MD<sup>1</sup>, Anke Neumann MSc, PhD<sup>1</sup>, Antoine Pariente MD, PhD<sup>2,3</sup>

<sup>1</sup> Department of Studies in Public Health, French National Health Insurance (Caisse Nationale de l'Assurance Maladie/Cnam), 75 986 Paris Cedex 20, France.

<sup>2</sup> University of Bordeaux, Inserm, Bordeaux Population Health Research Center, team Pharmacoepidemiology - UMR 1219, F-33000 Bordeaux, France

<sup>3</sup> CHU de Bordeaux, Pharmacologie, F-33000 Bordeaux, France

**Address for correspondence:** Géric MAURA, Cnam/DSES/DESP, National Health Insurance, 50 avenue du Pr. André Lemierre, 75986 Paris cedex 20; E-mail: [geric.maura@assurance-maladie.fr](mailto:geric.maura@assurance-maladie.fr); Telephone: +33(0)172602338; Fax: +33(0)172601724

Word count of text: (excluding the title page, abstract, tables, acknowledgements, contributions and references): 3,990/4,000

Word count of abstract: 300/300

Number of references: 63

Number of tables: 2

Number of figures: 3

Number of supplementary tables: 2

## Abstract

**Objectives:** To describe i) the trend in oral anticoagulant (OAC) use following the introduction of direct oral anticoagulant (DOAC) therapy for stroke prevention in atrial fibrillation (AF) patients; ii) the current patterns of use of DOAC therapy in new users with AF in France.

**Design:** i) Repeated cross-sectional study; ii) Population-based cohort study.

**Setting:** French National Healthcare databases (Régime général, 50 million beneficiaries).

**Participants:** i) Patients with identified AF in 2011, 2013, and 2016; ii) Patients with AF initiating OAC therapy in 2015-2016.

**Primary and secondary outcome measures:** i) Trend in oral anticoagulant therapy use in patients with AF; ii) Patterns of use of DOAC therapy in new users with AF.

**Results:** Between 2011 and 2016, use of OAC therapy moderately increased (+16%), while use of antiplatelet therapy decreased (-22%) among all patients with identified AF. In 2016, among the 1.1 million AF patients, 66% used OAC therapy and were more likely to be treated by VKA than DOAC therapy, including patients at higher risk of stroke (63.5%), while 33% used antiplatelet therapy. Among 192,851 new users of OAC therapy in 2015-2016 with identified AF, DOAC therapy (66.3%) was initiated more frequently than VKA therapy, including in patients at higher risk of stroke (57.8%). Reduced doses were prescribed in 40% of DOAC new users. Several situations of inappropriate use at DOAC initiation were identified, including concomitant use of drugs increasing the risk of bleeding (one in three new users) and potential DOAC underdosing.

**Conclusions:** OAC therapy use in AF patients remains suboptimal 4 years after the introduction of DOACs for stroke prevention in France and improvement in appropriate prescribing regarding DOAC initiation is needed. However, DOAC therapy is now the preferred drug class for initiation of OAC therapy in patients with AF, including in patients at higher risk of stroke.

**Strengths and limitations of this study**

- This study is the first to report both the 2011-2016 trend in oral anticoagulant (OAC) coverage in patients with atrial fibrillation (AF) following the introduction of direct oral anticoagulant (DOAC) therapy in France and the current patterns of use of DOACs in new users including assessment of potential inappropriate use;
- This study is based on reimbursement data for 50 million beneficiaries with access to all OAC prescriptions filled in the ambulatory setting;
- As indications for treatment are not available in the databases, AF was mostly identified on the basis of discharge and long-term disease diagnosis codes and an algorithm previously validated in the French healthcare databases that helped to further identify AF in outpatients.

## Introduction

Direct Oral Anticoagulants (DOACs) have been gradually introduced over the past decade as a more convenient, fixed-dose alternative to vitamin K antagonists (VKAs), the only oral anticoagulant therapy available up until now for long-term stroke prevention in patients with non-valvular atrial fibrillation (AF) [1]. Compared to VKA, DOAC therapy avoids the need for regular laboratory monitoring of patients by INR testing due to a wider therapeutic window, allows once (rivaroxaban, edoxaban) or twice (dabigatran, apixaban) daily intake and is associated with fewer drug-drug interactions to date [2–6]. DOACs have been demonstrated to have similar or superior efficacy to warfarin for stroke prevention in nv-AF patients, and these findings have recently been implemented in the 2016 European Society of Cardiology (ESC) guidelines that recommended DOAC over VKA therapy in this indication [7]. Moreover, antiplatelet therapy is no longer recommended in these patients [7,8]. The use of DOAC therapy, massively adopted worldwide including in France [9–15], is expected to overcome the suboptimal use of oral anticoagulant (OAC) therapy extensively reported with VKA therapy, including underprescribing and high discontinuation rates [16,17].

Despite their improved ease of use, DOAC prescribed dose needs to be adjusted to the patient's clinical profile with regards to age, renal function, weight, and risks of bleeding and drug-drug interactions. Two dose regimens are therefore proposed for each DOAC: standard dose regimen (*i.e.* dabigatran 150mg/12h, rivaroxaban 20mg/24h; apixaban 5mg/12h), and reduced-dose regimen (*i.e.* dabigatran 75mg or 110mg/12h, rivaroxaban 10mg or 15mg/24h; apixaban 2.5mg/12h). The reasons for prescribing a reduced-dose regimen are listed in the summary of product characteristics (SmPCs) of each DOAC with differences across DOACs as well as in the ESC [7,8] and European Heart Rhythm Association (EHRA) guidelines [18]. Recent publications have suggested that the frequency of use of reduced-dose DOACs in clinical practice could largely exceed that expected on the basis of the conditions summarized in these guidelines [11,19–21]. However, national data are lacking concerning the current French patterns of DOAC use, including the potential issue of DOAC underdosing.

A steady increase in the initiation of DOAC therapy has already been reported in AF patients in France [14], but trends in OAC coverage of AF patients following the introduction of DOACs and a description of the current national patterns of DOAC use have not yet been reported. This study, based on the French nationwide healthcare databases, therefore had a twofold objective: 1) to describe the trends in OAC use following the introduction of DOAC for stroke prevention in AF patients during the 2011-2016 period; 2) to describe the current patterns of use of OAC therapies with particular focus on DOAC use in new users with AF.

## Methods

### Data source

French national health insurance (*Assurance Maladie*) covers the entire French population by means of several specific schemes according to the beneficiary's occupational sector, the largest scheme being the '*Régime général*' (around 50 million beneficiaries).

This study was conducted using data from the French health insurance system database (SNIIRAM) linked to the French hospital discharge database (PMSI) [22,23]. The SNIIRAM database contains individualized, anonymous, and comprehensive data on health spending reimbursements. Demographic data include date of birth, gender, and vital status. Drugs are coded according to the Anatomical Therapeutic Chemical (ATC) classification. Each packaging of each product is identified by means of a national specific pack identifier code providing information on the name of the product, active ingredient and dose per unit, number of units, and route of administration; but, the exact dosage prescribed and the indication are not available. However, for most drugs, particularly OACs, each dispensing of the prescribed drug cannot exceed the quantity necessary for one month of treatment. The PMSI database provides detailed information about discharge diagnoses and medical procedures related to all hospitalizations in France. This information regarding morbidities is completed by diagnoses corresponding to patient eligibility for 100% reimbursement of severe and costly long-term diseases (LTD) and disability, such as AF, coronary heart disease, certain debilitating diseases (such as multiple sclerosis or rheumatoid arthritis), HIV infection, cancer, etc. All information concerning medical diagnosis is encoded according to the International Classification of Diseases, 10th revision (ICD-10). Finally, the SNIIRAM-PMSI databases also indicate medical procedures performed in the ambulatory setting, including information about the type and date of all laboratory tests performed, but not including their results.

The French healthcare databases have been previously described and used in epidemiological and pharmacoepidemiological studies [22,24–26].

### Study populations and study designs

A study population was defined for each objective. First, in a repeated cross-sectional study, patients with AF were identified for each of the following calendar years: 2011 (no DOAC available for stroke prevention in France), 2013 (first calendar year with both rivaroxaban and dabigatran reimbursed for stroke prevention in July 2012) and 2016 (the most recent data available at the time of writing the study protocol; dabigatran, rivaroxaban and apixaban were all reimbursed for stroke prevention in France, as apixaban was reimbursed from January 2014 onwards). For each of these calendar years, a patient was considered to have AF when at least one diagnosis of AF (ICD-10 code I48) was identified

1  
2  
3 from discharge and LTD diagnoses in the SNIIRAM-PMSI database in the calendar year considered or  
4 during the previous 5 years. Patients with no continuous '*Régime général*' health insurance coverage  
5 for at least six years before the calendar year considered were excluded.

6  
7 Second, a retrospective population-based cohort study was performed in patients with AF among  
8 those initiating DOAC therapy in 2015-2016. To be included in this cohort, patients with continuous  
9 '*Régime général*' health insurance coverage had to be identified as DOAC new users: at least one  
10 reimbursement for DOAC therapy in 2015-2016 and no reimbursement for any OAC (VKA or DOAC) in  
11 the previous 24 months. The patient's index date was the date of first DOAC reimbursement  
12 identified during the 2015-2016 period. After exclusion of patients treated for other OAC indications  
13 *i.e.* patients treated for deep vein thrombosis/pulmonary embolism (DVT/PE) or with lower limb  
14 orthopaedic procedures, DOAC new users treated for AF were identified from the resulting cohort as:  
15 (a) "DOAC new users with confirmed AF" for those with a diagnosis of AF (ICD-10 code I48) or specific  
16 AF management procedures identified from LTD or hospitalization discharge data during a six-year  
17 pre-index period; and (b) "DOAC new users with probable AF" for outpatients identified using an  
18 algorithm discriminating AF from DVT/PE with 95% specificity [27]. The remaining patients were not  
19 classified as probable FA patients and were excluded. Codes used for identification of AF and all of  
20 the patient characteristics considered, including comorbidities, are displayed in **Supplementary Table**  
21 **1**.

### 32 **Exposure**

33 DOAC (dabigatran, rivaroxaban, apixaban) and VKA therapies (fluindione, warfarin and  
34 acenocoumarol) were identified using ATC codes; edoxaban was not available in France during the  
35 period considered.

### 39 **Outcomes**

40  
41 Trends in oral anticoagulant therapy use in patients with AF

42 The proportion of AF patients treated by OAC therapy was assessed before and after approval of  
43 DOAC therapies for stroke prevention in France. Trends in the use of antiplatelet agents were also  
44 assessed in AF patients over the same timeframe.

45  
46  
47 Patterns of use of DOAC therapy in new users with AF

48 The description of patterns of DOAC use in new users treated for AF in 2015-2016 included  
49 comparison of the baseline characteristics among DOAC new users and compared to those of VKA  
50 new users and potential inappropriate use of DOAC therapy was then investigated by identifying:

51 (i) DOAC off-label use or non-approved indication/dose: contraindications to DOAC therapy according  
52 to SmPCs [concomitant coagulopathy, purpura and other haemorrhagic conditions, liver fibrosis and  
53



1  
2  
3 cirrhosis, recent gastrointestinal ulceration or intracranial haemorrhage], valvular atrial fibrillation  
4 [DOAC are only approved for non-valvular AF], prosthetic heart valve [contraindicated for  
5 dabigatran], cancer [DOAC are not approved for prevention of thromboembolism in patients with  
6 cancer] and prescription of DOAC doses not approved for stroke prevention in Europe [dabigatran 75  
7 mg and rivaroxaban 10 mg are not approved for stroke prevention in Europe and are therefore off-  
8 label doses in AF patients]; (ii) non-compliance with guidelines with respect to follow-up and clinical  
9 work-up of patients during the first year following DOAC initiation: no monitoring of patients' renal  
10 function [renal function should be assessed at initiation and annually during DOAC therapy [28]],  
11 discontinuation of DOAC therapy [OAC therapy is recommended as lifetime treatment in most  
12 patients with AF] (iii) clinically relevant drug-drug interactions at initiation increasing the bleeding  
13 risk at initiation; (iv) potential inappropriate underdosing, i.e. patients in whom the DOAC dose  
14 prescribed at initiation was inappropriately reduced in view of their individual stroke and bleeding  
15 risks.  
16  
17  
18  
19  
20  
21  
22  
23

#### 24 **Data analysis**

25 Descriptive analyses are expressed as mean and standard deviation (SD) for continuous variables,  
26 and numbers and percentages for categorical variables.  
27  
28

#### 29 Trends in oral anticoagulant therapy use in patients with AF

30 For each calendar year, the proportion of patients treated by a drug was defined by the number of  
31 patients with at least one reimbursement for this drug in the calendar year considered over the total  
32 number of patients identified as having AF in the same year. Proportions are reported according to  
33 the type of OAC first reimbursed in the year considered. Antiplatelet drugs and OAC therapies were  
34 considered to be coprescribed when they were reimbursed at least once on the same day during the  
35 calendar year studied. Analyses were replicated in subgroups of AF patients: (i) aged 75 years and  
36 over; (ii) female and male, separately; (iii) with a history of hospitalization for arterial  
37 thromboembolic events (ATE); (iv) with concomitant ischaemic heart disease (IHD) or prosthetic  
38 heart valve.  
39  
40  
41  
42  
43  
44  
45

#### 46 *Patterns of use of DOAC therapy in new users with AF*

47 Baseline characteristics of DOAC new users with AF included sociodemographic data, including  
48 deprivation index of the patient's municipality of residence [29], type of initial prescriber, clinical  
49 scores predicting the risk of stroke (CHA<sub>2</sub>DS<sub>2</sub>-VASc score) or bleeding (HAS-BLED score) [30,31],  
50 adapted to claims data and the other main comorbidities and comedications, including proxies of  
51 frailty.  
52  
53  
54  
55  
56  
57  
58  
59  
60

1  
2  
3 Compliance with guidelines regarding renal function monitoring and treatment persistence patterns  
4 were assessed in new users for whom data for at least one year of follow-up were available, i.e.  
5 patients included in 2015 and who had not died and had not been hospitalized for 3 months or  
6 longer. Compliance with renal function monitoring was assessed at DOAC initiation (no  
7 reimbursement for renal function monitoring during the three months before and the three months  
8 after DOAC initiation) and during the first year following treatment initiation. OAC non-persistence  
9 patterns were assessed over the one-year period following the index date by calculating proxies of  
10 OAC discontinuation: number of patients with only one reimbursement and those with five or less  
11 reimbursements.  
12

13  
14  
15  
16  
17 Drugs increasing the risk of bleeding were those responsible for clinically relevant pharmacodynamic  
18 interactions with OAC therapy, i.e. concomitant reimbursement of other parenteral and oral  
19 antithrombotic drugs, non-steroidal anti-inflammatory drugs (NSAIDs); selective serotonin reuptake  
20 inhibitors and selective serotonin-norepinephrine reuptake inhibitors (SSRIs and SSNRIs) [7,18,32].  
21  
22 Patients taking concomitant drugs with OAC therapy were defined as those with a reimbursement for  
23 the drug of interest during the period corresponding to the index date and the following 45 days.  
24  
25 Analyses were replicated in VKA new users for descriptive purposes.  
26

27  
28 Finally, potential inappropriate underdosing with DOACs was defined as initiation of DOAC therapy in  
29 patients at risk of stroke in whom reduced doses of DOAC were prescribed with no identified  
30 justification. As this study was based on claims data and as, up until 2016, ESC guidelines  
31 recommended prescribing reduced-dose DOAC in patients with HAS-BLED $\geq$ 3 [8], the proportion of AF  
32 patients initiating reduced-dose DOAC with an HAS-BLED score $<$ 3 among all DOAC new users with a  
33 CHA<sub>2</sub>DS<sub>2</sub>-VASc score  $\geq$ 2 was used to quantify potential inappropriate underdosing in DOAC new  
34 users. Analyses were replicated in patients i) with CHA<sub>2</sub>DS<sub>2</sub>-VASc score  $\geq$ 4, ii) aged 75 and over with a  
35 history of ATE.  
36  
37  
38  
39  
40  
41  
42  
43  
44  
45  
46  
47  
48  
49  
50  
51  
52  
53  
54  
55  
56  
57  
58  
59  
60

## Results

### Trends in oral anticoagulant therapy use in patients with AF

The number of patients identified from French healthcare databases as having AF increased between 2011 (N=853,440) and 2016 (N=1,098,657). A high proportion of these patients were identified exclusively by hospitalization discharge diagnosis and this proportion decreased only slightly over this time interval from 90.2% (N=770,002) to 86.2% (N=946,657).

Between 2011 and 2016, the proportion of patients with at least one reimbursement for OAC therapy among all AF patients moderately increased (+16%) from 56.7% to 65.8%, corresponding to a steady decrease in VKA use (from 56.6% to 40.8% of all AF patients) associated with the introduction of DOACs (from 0.6% to 27.7%). In 2016, among patients with identified AF, VKA therapy remained the preferred OAC therapy (62.0%), including in patients aged 75 years and over (67.0%) and in those with a history of ATE (63.5%).

Between 2011 and 2016, the use of antiplatelet therapy decreased in AF patients (-22%), but the proportion of patients with concomitant OAC and antiplatelet therapy remained stable (9.7% in 2016). In 2016, 32.5% of AF patients had at least one reimbursement for antiplatelet therapy during the year.

Similar trends were observed in the subgroup analyses. A slightly higher rate of OAC therapy was observed in patients with a history of ATE (68.4% vs 65.8% in the total cohort in 2016). However, OAC coverage was lower in women than in men with AF (64.7% vs 66.8% in 2016) (**Figure 1**).

### Patterns of use of DOAC therapy in new users with AF

#### *Baseline characteristics of OAC new users*

Among 540,914 patients initiating OAC therapy in 2015-2016, a total of 192,851 (35.7%) patients were included in the study population, corresponding to 127,841 DOAC new users and 65,010 VKA new users with AF. The main reasons for ineligibility were other indications or uncertain identification of the indication for DOAC (**Figure 2**).

The mean age of the DOAC new users cohort was 74.1±11.6 years; patients over the age of 80 represented 37.3% of the total cohort. One-half of the DOAC new users were women, mean CHA<sub>2</sub>DS<sub>2</sub>-VASc and HAS-BLED scores were 3.7±1.6 and 2.0±0.9, respectively, and 40.0% received a reduced dose at initiation (62.2% for dabigatran new users). DOAC were mostly initiated by hospital practitioners and private cardiologists. Apixaban was the DOAC most commonly initiated; apixaban new users were older and had more comorbidities than the other two groups of DOAC new users. VKA new users were older with much more severe disease than each of the three DOAC new users.

1  
2  
3 DOAC therapy was more likely to be initiated than VKA therapy among patients aged 75 years and  
4 older (59.4%) and in patients with a history of ATE (57.8%) (**Table 1**).  
5

#### 6 7 *Potential inappropriate use of DOAC therapy*

8 About 15% of DOAC new users with AF were considered to be using DOAC off-label or for a non-  
9 approved indication. In particular, 8.5% of DOAC new users with AF had valvular heart disease (8.5%),  
10 including prosthetic heart valve (1.5%) and 4.6% had a recently or currently treated cancer (**Table 2**).  
11

12 About 15% and 9% of DOAC new users had no reimbursement for renal function tests at initiation  
13 and during the one-year period post-initiation, respectively. Discontinuation during the one-year  
14 period following initiation was frequent, as more than 20% of patients had five or less  
15 reimbursements (**Table 2**).  
16

17 Nearly 30% of DOAC new users were using at least one concomitant drug increasing the risk of  
18 bleeding (52% in VKA new users). The most common concomitant drugs concerned at initiation were  
19 antiplatelet agents or parenteral anticoagulants (**Table 2**).  
20

21 Among the 116,391 DOAC new users with AF with a CHA<sub>2</sub>DS<sub>2</sub>-VASc score  $\geq 2$ , 42.9% (N=49,935) of  
22 patients were prescribed a reduced dose at initiation, and 29.1% (N=33,845) also had an HAS-BLED  
23 score  $< 3$  meaning that nearly 1 in 3 DOAC new users with AF and at risk of stroke were therefore  
24 potentially prescribed an inappropriately reduced dose of DOAC at initiation. The proportion of  
25 patients potentially underdosed was 33% (N=24,281) in patients with a CHA<sub>2</sub>DS<sub>2</sub>-VASc score  $\geq 4$  and  
26 14.5% in patients aged 75 and over with a history of ATE (**Figure 3**).  
27

28 Among the patients with no criterion justifying dose reduction, i.e. patients with HAS-BLED $< 3$  only,  
29 these proportions were 39.3%, 51.9% and 58.4%, respectively. Differences in baseline characteristics  
30 were observed in patients with HAS-BLED $< 3$  according to the type of DOAC dose prescribed, e.g.  
31 patients with reduced-dose DOAC were frailer than those with standard-dose DOAC (**Supplementary**  
32 **Table 2**).  
33  
34  
35  
36  
37  
38  
39  
40  
41  
42  
43  
44  
45  
46  
47  
48  
49  
50  
51  
52  
53  
54  
55  
56  
57  
58  
59  
60

## Discussion

### Main findings

OAC therapy use among patients with AF improved in France between 2011 and 2016, but remained suboptimal with about 66% of the 1.1 million patients with identified AF treated by OAC therapy in 2016. Use of antiplatelet therapy in AF patients decreased over the same period, but still concerned 33% of all AF patients in 2016. Patients with AF were more likely to be treated by VKA than DOAC therapy, including older patients and those at higher risk of stroke.

Nearly 193,000 patients with AF were identified as OAC new users in 2015-2016: patients were more likely to be treated by DOAC than VKA therapy, including older patients and those at higher risk of stroke. Results on current patterns of use of DOAC therapy in new users with AF suggest several situations of inappropriate use, including frequent concomitant use of drugs increasing the risk of bleeding and potential inappropriate underdosing.

### Comparison with postmarketing literature and clinical implications

The overall improvement of management of AF patients observed with regards to OAC therapy after the introduction of DOACs has been reported in many countries [33–36]. The same applies to the steady decrease in VKA use in favour of DOAC therapies [12,37,38], and the gaps remaining in optimal OAC coverage and high antiplatelet drug use [39–41].

This study demonstrated channelling of DOAC therapy towards patients at lower risk of stroke and bleeding when considering all patients with AF, in line with what has become a common feature reported worldwide in clinical practice by many observational studies on the current patterns of use of DOACs [15,42–45]. However, DOAC therapy is now the preferred OAC therapy at initiation in the oldest patients and those at higher risk of stroke. This French pattern of OAC use has never been previously reported and contrasts with published results concerning earlier periods [46]. This emerging pattern is encouraging for AF management, as older and high-risk patients are those who should derive most benefit from DOAC *versus* VKA therapy [47].

Reduced doses were often prescribed in OAC new users, including dabigatran 75mg and rivaroxaban 10mg, which are not approved for stroke prevention in Europe [48]. In addition to the overall channelling mentioned above, these findings may reflect a “bleeding avoidance” strategy of prescribers (i.e. overestimation of the potential bleeding risk *versus* the likely benefit of stroke reduction) and the differential perception of the comparative safety of DOACs *versus* VKA and between DOACs. The early safety alert on bleeding in dabigatran-treated patients, followed by the contraindication of this DOAC in patients with prosthetic heart valves, may have reinforced the fears of prescribers in relation to the safety of dabigatran, which would explain the difference in reduced-

1  
2  
3 dose prescription rates between the three DOACs in this study, despite the intermediate stroke and  
4 bleeding risk profile of dabigatran compared to that of rivaroxaban and apixaban in new users.  
5 Similarly, among DOAC new users, apixaban was prescribed to the oldest and most severe patients.  
6 Apixaban was the only DOAC found to be superior to warfarin for all types of bleeding outcome and  
7 all-cause mortality, which would also illustrate the tendency of physicians to prescribe OAC therapies  
8 according to bleeding risk [5]. This may also explain the potential inappropriate underdosing  
9 observed in DOAC users in this study. This pattern of DOAC use has been previously reported, but  
10 mostly in field and registry studies based on small sample sizes. The reported inappropriate  
11 underdosing rate varies according to studies and the definition used. DOAC underdosing concerned  
12 30.4% of Turkish patients in the RAMSES study (N=2,086) [49], 18.4% of Japanese patients of the *KiCS*  
13 AF registry (N=1,284) [50,51], between 19.7% and 27.6% of patients in the SAKURA AF registry (N=  
14 3,266) [52], and 9.4% to 16% of patients in the ORBIT-AF II registry (N=7925) [21,53]. In the subgroup  
15 of Dutch patients (N=899) enrolled in the XANTUS registry, 33% of patients were also treated with  
16 reduced-dose rivaroxaban despite presenting normal renal function [54]. Using a large U.S.  
17 administrative database, Yao *et al* found that 13.3% of the 13,392 DOAC new users with no renal  
18 indication for dose reduction were potentially underdosed [55]. Taken together with our results,  
19 these data suggest that inappropriate underdosing might be a common issue in DOAC new users that  
20 should be systematically assessed when studying DOAC patterns of use. This is of particular concern,  
21 as recent data have suggested a relationship between DOAC dose and clinical outcomes [56]. In  
22 particular, DOAC underdosing has been shown to be associated with increased risk for adverse  
23 outcomes [21,55].

24  
25  
26  
27  
28  
29  
30  
31  
32  
33  
34  
35  
36  
37  
38  
39  
40  
41  
42  
43  
44  
45  
46  
47  
48  
49  
50  
51  
52  
53  
54  
55  
56  
57  
58  
59  
60  
These patterns of DOAC use contrast with the other patterns concomitantly observed in this study,  
such as the high level of concomitant prescription of antiplatelet agents and parenteral  
anticoagulants or, to a lesser extent, DOAC use in non-approved indications such as prosthetic heart  
valves that are both associated with an increased risk of bleeding [57–59].

### Strengths and limitations

This study is the first to report the improved trend in OAC coverage in French patients with AF over  
the last five years as well as the recent patterns of use of OAC therapy in new users, particularly  
including a nationwide assessment of the growing issue of DOAC underdosing, based on health data  
for more than 50 million beneficiaries. Moreover, all OAC prescriptions filled in the ambulatory  
setting are captured in the databases and are reimbursed with no restriction of coverage: selection  
bias related to the access of patients to more expensive DOAC therapy is therefore not an issue with  
the use of French healthcare databases [22,60].

1  
2  
3 However, several limitations related to the nature of the data used should be underlined. First of all,  
4 it cannot be verified whether patients actually took the drugs for which they were reimbursed.  
5  
6 Secondly, as the indication for treatment is not available in the databases, and despite the use of an  
7 algorithm to identify AF among outpatients in the French healthcare databases, identification of AF  
8 was mostly based on non-validated discharge and LTD diagnoses recorded in the databases.  
9  
10 Moreover, it cannot be excluded that the increase in the identified number of patients with AF over  
11 the 2011-2016 period could be partially explained by changes in LTD legislation in 2011 (e.g.  
12 hypertension was removed from the list of LTD, while access to LTD was facilitated for patients with  
13 severe arrhythmia and valvular heart diseases) which could have helped identify patients with AF.  
14  
15 Thirdly, identification of inappropriate underdosing at DOAC initiation was also indirectly assessed by  
16 using stroke and bleeding risk scores computed from claims data. Important medical data such as  
17 patient's weight, renal function assessment and exact alcohol consumption are not available in the  
18 French healthcare databases. Furthermore, the agreement between these empirical scores in  
19 patients with AF and the prescriber-assessed stroke and bleeding risk is a subject of discussion [61].  
20  
21 However, DOAC misuse and underdosing have also been reported in a French prospective field study  
22 based on patients' medical charts [62]. Of note, as INR values were not available in the databases,  
23 underdosing with VKA therapy was not assessed in this study, but has been frequently reported and  
24 must not be overlooked [52,63]. In addition, the results for DOAC and VKA new users are difficult to  
25 compare, as they were not adjusted for significant differences in baseline characteristics and this  
26 comparison was not the purpose of this study.  
27  
28  
29  
30  
31  
32  
33  
34  
35  
36

### 37 **Conclusion**

38 OAC therapy use has modestly increased after the introduction of the DOACs for stroke prevention in  
39 patients with AF in France and DOAC therapy is now the preferred OAC therapy at initiation in older  
40 patients at higher risk of stroke. However, results from this nationwide drug utilization study suggest  
41 the need for improvement in appropriate prescription of OAC therapy in these patients, especially  
42 regarding the use of concomitant interacting drugs and the choice of initial DOAC dose.  
43  
44  
45  
46  
47  
48  
49  
50  
51  
52  
53  
54  
55  
56  
57  
58  
59  
60

### Contributor ship statement

GM, AP, CB and AN designed the study. All authors have contributed substantially to the interpretation of results. In addition: GM, AP and AN drafted the article; CB, JD and AN conducted the statistical analysis; GM, AP, AN, CB, JD, AW provided critical revision of the manuscript for important intellectual content. All authors had full access to all of the data (including statistical reports and tables) in the study and can take responsibility for the integrity of the data and the accuracy of the data analysis. All authors approved the version to be published.

### Competing interests

All authors have no conflict of interest.

GM, CB, JD, AN and AW are employees of the French National Health Insurance (Cnam, Assurance Maladie); AP belongs to the French National Institute of Health and Medical Research (Inserm).

All authors have no conflicts of interest with the Pharmaceutical Industry.

### Funding

The authors received no funding.

### Data sharing statement

Data are available from the French National Health Insurance (*Caisse Nationale de l'Assurance Maladie*, Cnam) for academic research and the data access permission policy prohibits making the data set publicly available. All databases used in this study only contained anonymous patient records.

### Ethics approval

The study was approved by the French data protection agency (*Commission Nationale de l'Informatique et des Libertés*, Cnil).

### Acknowledgments

The authors thank Dr Saul, medical translator, for assistance in writing the manuscript.



## References

- 1 Steinberg BA, Piccini JP. Anticoagulation in atrial fibrillation. *BMJ* 2014;**348**:g2116–g2116. doi:10.1136/bmj.g2116
- 2 Verheugt FWA, Granger CB. Oral anticoagulants for stroke prevention in atrial fibrillation: current status, special situations, and unmet needs. *The Lancet* 2015;**386**:303–10. doi:10.1016/S0140-6736(15)60245-8
- 3 Connolly SJ, Ezekowitz MD, Yusuf S, *et al.* Dabigatran versus Warfarin in Patients with Atrial Fibrillation. *N Engl J Med* 2009;**361**:1139–51. doi:10.1056/NEJMoa0905561
- 4 Patel MR, Mahaffey KW, Garg J, *et al.* Rivaroxaban versus Warfarin in Nonvalvular Atrial Fibrillation. *N Engl J Med* 2011;**365**:883–91. doi:10.1056/NEJMoa1009638
- 5 Granger CB, Alexander JH, McMurray JJV, *et al.* Apixaban versus Warfarin in Patients with Atrial Fibrillation. *N Engl J Med* 2011;**365**:981–92. doi:10.1056/NEJMoa1107039
- 6 Giugliano RP, Ruff CT, Braunwald E, *et al.* Edoxaban versus Warfarin in Patients with Atrial Fibrillation. *N Engl J Med* 2013;**369**:2093–104. doi:10.1056/NEJMoa1310907
- 7 Kirchhof P, Benussi S, Kotecha D, *et al.* 2016 ESC Guidelines for the management of atrial fibrillation developed in collaboration with EACTS. *Eur Heart J* 2016;**37**:2893–962. doi:10.1093/eurheartj/ehw210
- 8 Authors/Task Force Members, Camm AJ, Lip GYH, *et al.* 2012 focused update of the ESC Guidelines for the management of atrial fibrillation: An update of the 2010 ESC Guidelines for the management of atrial fibrillation \* Developed with the special contribution of the European Heart Rhythm Association. *Eur Heart J* 2012;**33**:2719–47. doi:10.1093/eurheartj/ehs253
- 9 Desai NR, Krumme AA, Schneeweiss S, *et al.* Patterns of Initiation of Oral Anticoagulants in Patients with Atrial Fibrillation— Quality and Cost Implications. *Am J Med* 2014;**127**:1075–1082.e1. doi:10.1016/j.amjmed.2014.05.013
- 10 Barnes GD, Lucas E, Alexander GC, *et al.* National Trends in Ambulatory Oral Anticoagulant Use. *Am J Med* 2015;**128**:1300–1305.e2. doi:10.1016/j.amjmed.2015.05.044
- 11 Haastруп S, Hellfritsch M, Rasmussen L, *et al.* Use of Non-Vitamin K Antagonist Oral Anticoagulants 2008-2016: A Danish Nationwide Cohort Study. *Basic Clin Pharmacol Toxicol* Published Online First: 17 April 2018. doi:10.1111/bcpt.13024
- 12 Kjerpeseth LJ, Ellekjær H, Selmer R, *et al.* Trends in use of warfarin and direct oral anticoagulants in atrial fibrillation in Norway, 2010 to 2015. *Eur J Clin Pharmacol* Published Online First: 22 July 2017. doi:10.1007/s00228-017-2296-1
- 13 Staerk L, Fosbøl EL, Gadsbøll K, *et al.* Non-vitamin K antagonist oral anticoagulation usage according to age among patients with atrial fibrillation: Temporal trends 2011–2015 in Denmark. *Sci Rep* 2016;**6**. doi:10.1038/srep31477
- 14 Huiart L, Ferdynus C, Renoux C, *et al.* Trends in initiation of direct oral anticoagulant therapies for atrial fibrillation in a national population-based cross-sectional study in the French health insurance databases. *BMJ Open* 2018;**8**:e018180. doi:10.1136/bmjopen-2017-018180

- 1  
2  
3 15 Urbaniak AM, Strøm BO, Krøntveit R, *et al.* Prescription Patterns of Non-Vitamin K Oral  
4 Anticoagulants Across Indications and Factors Associated with Their Increased Prescribing in  
5 Atrial Fibrillation Between 2012–2015: A Study from the Norwegian Prescription Database. *Drugs*  
6 *Aging* 2017;**34**:635–45. doi:10.1007/s40266-017-0476-4  
7
- 8 16 Broderick JP, Bonomo JB, Kissela BM, *et al.* Withdrawal of Antithrombotic Agents and Its Impact  
9 on Ischemic Stroke Occurrence. *Stroke* 2011;**42**:2509–14. doi:10.1161/STROKEAHA.110.611905  
10
- 11 17 Fang MC, Go AS, Chang Y, *et al.* Warfarin Discontinuation After Starting Warfarin for Atrial  
12 Fibrillation. *Circ Cardiovasc Qual Outcomes* 2010;**3**:624–31.  
13 doi:10.1161/CIRCOUTCOMES.110.937680  
14
- 15 18 Heidbuchel H, Verhamme P, Alings M, *et al.* Updated European Heart Rhythm Association  
16 practical guide on the use of non-vitamin-K antagonist anticoagulants in patients with non-  
17 valvular atrial fibrillation: Executive summary. *Eur Heart J* 2016;:ehw058.  
18 doi:10.1093/eurheartj/ehw058  
19
- 20 19 Dillinger J-G, Aleil B, Cheggour S, *et al.* Dosing issues with non-vitamin K antagonist oral  
21 anticoagulants for the treatment of non-valvular atrial fibrillation: Why we should not underdose  
22 our patients. *Arch Cardiovasc Dis* 2018;**111**:85–94. doi:10.1016/j.acvd.2017.04.008  
23
- 24 20 Marzec LN, Wang J, Shah ND, *et al.* Influence of Direct Oral Anticoagulants on Rates of Oral  
25 Anticoagulation for Atrial Fibrillation. *J Am Coll Cardiol* 2017;**69**:2475–84.  
26 doi:10.1016/j.jacc.2017.03.540  
27
- 28 21 Steinberg BA, Shrader P, Thomas L, *et al.* Off-Label Dosing of Non-Vitamin K Antagonist Oral  
29 Anticoagulants and Adverse Outcomes. *J Am Coll Cardiol* 2016;**68**:2597–604.  
30 doi:10.1016/j.jacc.2016.09.966  
31
- 32 22 Tuppin P, Rudant J, Constantinou P, *et al.* Value of a national administrative database to guide  
33 public decisions: From the système national d’information interrégimes de l’Assurance Maladie  
34 (SNIIRAM) to the système national des données de santé (SNDS) in France. *Rev Épidémiologie*  
35 *Santé Publique* 2017;**65**:S149–67. doi:10.1016/j.respe.2017.05.004  
36
- 37 23 Bezin J, Duong M, Lassalle R, *et al.* The national healthcare system claims databases in France,  
38 SNIIRAM and EGB: Powerful tools for pharmacoepidemiology. *Pharmacoepidemiol Drug Saf*  
39 Published Online First: 24 May 2017. doi:10.1002/pds.4233  
40
- 41 24 Maura G, Blotière P-O, Bouillon K, *et al.* Comparison of the Short-Term Risk of Bleeding and  
42 Arterial Thromboembolic Events in Nonvalvular Atrial Fibrillation Patients Newly Treated With  
43 Dabigatran or Rivaroxaban Versus Vitamin K Antagonists: A French Nationwide Propensity-  
44 Matched Cohort Study. *Circulation* 2015;**132**:1252–60.  
45 doi:10.1161/CIRCULATIONAHA.115.015710  
46
- 47 25 Weill A, Dalichampt M, Raguideau F, *et al.* Low dose oestrogen combined oral contraception and  
48 risk of pulmonary embolism, stroke, and myocardial infarction in five million French women:  
49 cohort study. *BMJ* 2016;**353**:i2002.  
50
- 51 26 Neumann A, Maura G, Weill A, *et al.* Clinical Events After Discontinuation of  $\beta$ -Blockers in  
52 Patients Without Heart Failure Optimally Treated After Acute Myocardial Infarction: A Cohort  
53 Study on the French Healthcare Databases. *Circ Cardiovasc Qual Outcomes* 2018;**11**:e004356.  
54 doi:10.1161/CIRCOUTCOMES.117.004356  
55  
56  
57  
58  
59

- 1  
2  
3 27 Billionnet C, Alla F, Bérigaud É, *et al.* Identifying atrial fibrillation in outpatients initiating oral  
4 anticoagulants based on medico-administrative data: results from the French national healthcare  
5 databases: Identification of Atrial Fibrillation in Claims. *Pharmacoepidemiol Drug Saf*  
6 2017;**26**:535–43. doi:10.1002/pds.4192  
7  
8 28 Haute autorité de santé. Guide parcours de soins Fibrillation atriale. 2014. [https://www.has-](https://www.has-sante.fr/portail/jcms/c_1741768/fr/guide-parcours-de-soins-fibrillation-atriale)  
9 [sante.fr/portail/jcms/c\\_1741768/fr/guide-parcours-de-soins-fibrillation-atriale](https://www.has-sante.fr/portail/jcms/c_1741768/fr/guide-parcours-de-soins-fibrillation-atriale) (accessed 18 Jul  
10 2018).  
11  
12 29 Rey G, Jouglu E, Fouillet A, *et al.* Ecological association between a deprivation index and  
13 mortality in France over the period 1997 – 2001: variations with spatial scale, degree of  
14 urbanicity, age, gender and cause of death. *BMC Public Health* 2009;**9**:33. doi:10.1186/1471-  
15 2458-9-33  
16  
17 30 Olesen JB, Lip GYH, Hansen ML, *et al.* Validation of risk stratification schemes for predicting  
18 stroke and thromboembolism in patients with atrial fibrillation: nationwide cohort study. *BMJ*  
19 2011;**342**:d124–d124. doi:10.1136/bmj.d124  
20  
21 31 Pisters R, Lane DA, Nieuwlaet R, *et al.* A novel user-friendly score (HAS-BLED) to assess 1-year risk  
22 of major bleeding in patients with atrial fibrillation: the Euro Heart Survey. *Chest* 2010;**138**:1093–  
23 100. doi:10.1378/chest.10-0134  
24  
25 32 Renoux C, Vahey S, Dell’Aniello S, *et al.* Association of Selective Serotonin Reuptake Inhibitors  
26 With the Risk for Spontaneous Intracranial Hemorrhage. *JAMA Neurol* 2017;**74**:173.  
27 doi:10.1001/jamaneurol.2016.4529  
28  
29 33 Cowan JC, Wu J, Hall M, *et al.* A 10 year study of hospitalized atrial fibrillation-related stroke in  
30 England and its association with uptake of oral anticoagulation. *Eur Heart J* Published Online  
31 First: 5 July 2018. doi:10.1093/eurheartj/ehy411  
32  
33 34 Steinberg BA, Gao H, Shrader P, *et al.* International trends in clinical characteristics and oral  
34 anticoagulation treatment for patients with atrial fibrillation: Results from the GARFIELD-AF,  
35 ORBIT-AF I, and ORBIT-AF II registries. *Am Heart J* 2017;**194**:132–40.  
36 doi:10.1016/j.ahj.2017.08.011  
37  
38 35 Brown JD, Shewale AR, Dherange P, *et al.* A Comparison of Oral Anticoagulant Use for Atrial  
39 Fibrillation in the Pre- and Post-DOAC Eras. *Drugs Aging* 2016;**33**:427–36. doi:10.1007/s40266-  
40 016-0369-y  
41  
42 36 Apenteng PN, Gao H, Hobbs FR, *et al.* Temporal trends in antithrombotic treatment of real-world  
43 UK patients with newly diagnosed atrial fibrillation: findings from the GARFIELD-AF registry. *BMJ*  
44 *Open* 2018;**8**:e018905. doi:10.1136/bmjopen-2017-018905  
45  
46 37 Alalwan AA, Voils SA, Hartzema AG. Trends in utilization of warfarin and direct oral  
47 anticoagulants in older adult patients with atrial fibrillation. *Am J Health Syst Pharm*  
48 2017;**74**:1237–44. doi:10.2146/ajhp160756  
49  
50 38 Olesen JB, Sorensen R, Hansen ML, *et al.* Non-vitamin K antagonist oral anticoagulation agents in  
51 anticoagulant naive atrial fibrillation patients: Danish nationwide descriptive data 2011-2013.  
52 *Europace* 2015;**17**:187–93. doi:10.1093/europace/euu225  
53  
54  
55  
56  
57  
58  
59  
60

- 1  
2  
3 39 Lacoïn L, Lumley M, Ridha E, *et al.* Evolving landscape of stroke prevention in atrial fibrillation  
4 within the UK between 2012 and 2016: a cross-sectional analysis study using CPRD. *BMJ Open*  
5 2017;**7**:e015363. doi:10.1136/bmjopen-2016-015363  
6  
7 40 Averlant L, Ficheur G, Ferret L, *et al.* Underuse of Oral Anticoagulants and Inappropriate  
8 Prescription of Antiplatelet Therapy in Older Inpatients with Atrial Fibrillation. *Drugs Aging*  
9 2017;**34**:701–10. doi:10.1007/s40266-017-0477-3  
10  
11 41 Alamneh EA, Chalmers L, Bereznicki LR. Suboptimal Use of Oral Anticoagulants in Atrial  
12 Fibrillation: Has the Introduction of Direct Oral Anticoagulants Improved Prescribing Practices?  
13 *Am J Cardiovasc Drugs* 2016;**16**:183–200. doi:10.1007/s40256-016-0161-8  
14  
15 42 Douros A, Renoux C, Coulombe J, *et al.* Patterns of long-term use of non-vitamin K antagonist  
16 oral anticoagulants for non-valvular atrial fibrillation: Quebec observational study.  
17 *Pharmacoepidemiol Drug Saf* 2017;**26**:1546–54. doi:10.1002/pds.4333  
18  
19 43 Komen J, Forslund T, Hjemdahl P, *et al.* Factors associated with antithrombotic treatment  
20 decisions for stroke prevention in atrial fibrillation in the Stockholm region after the introduction  
21 of NOACs. *Eur J Clin Pharmacol* 2017;**73**:1315–22. doi:10.1007/s00228-017-2289-0  
22  
23 44 Patel PA, Zhao X, Fonarow GC, *et al.* Novel Oral Anticoagulant Use Among Patients With Atrial  
24 Fibrillation Hospitalized With Ischemic Stroke or Transient Ischemic Attack. *Circ Cardiovasc Qual*  
25 *Outcomes* 2015;**8**:383–92. doi:10.1161/CIRCOUTCOMES.114.000907  
26  
27 45 Lauffenburger JC, Farley JF, Gehi AK, *et al.* Factors Driving Anticoagulant Selection in Patients  
28 With Atrial Fibrillation in the United States. *Am J Cardiol* 2015;**115**:1095–101.  
29 doi:10.1016/j.amjcard.2015.01.539  
30  
31 46 Maura G, Billionnet C, Alla F, *et al.* Comparison of Treatment Persistence with Dabigatran or  
32 Rivaroxaban versus Vitamin K Antagonist Oral Anticoagulants in Atrial Fibrillation Patients: A  
33 Competing Risk Analysis in the French National Health Care Databases. *Pharmacother J Hum*  
34 *Pharmacol Drug Ther* 2018;**38**:6–18. doi:10.1002/phar.2046  
35  
36 47 Ruff CT, Giugliano RP, Braunwald E, *et al.* Comparison of the efficacy and safety of new oral  
37 anticoagulants with warfarin in patients with atrial fibrillation: a meta-analysis of randomised  
38 trials. *The Lancet* 2014;**383**:955–62. doi:10.1016/S0140-6736(13)62343-0  
39  
40 48 Sorensen HT, Riis AH, Lash TL, *et al.* Statin Use and Risk of Amyotrophic Lateral Sclerosis and  
41 Other Motor Neuron Disorders. *Circ Cardiovasc Qual Outcomes* 2010;**3**:413–7.  
42 doi:10.1161/CIRCOUTCOMES.110.936278  
43  
44 49 Başaran Ö, Dogan V, Beton O, *et al.* Suboptimal use of non-vitamin K antagonist oral  
45 anticoagulants: Results from the RAMSES study. *Medicine (Baltimore)* 2016;**95**:e4672.  
46 doi:10.1097/MD.00000000000004672  
47  
48 50 Ono T, Kohsaka S, Takatsuki S, *et al.* Inconsistent Dosing of Non-Vitamin K Oral Anticoagulants. *J*  
49 *Am Coll Cardiol* 2017;**70**:118. doi:10.1016/j.jacc.2017.03.609  
50  
51 51 Hsu JC, Akao M, Abe M, *et al.* International Collaborative Partnership for the Study of Atrial  
52 Fibrillation (INTERAF): Rationale, Design, and Initial Descriptives. *J Am Heart Assoc*  
53 2016;**5**:e004037. doi:10.1161/JAHA.116.004037  
54  
55  
56  
57  
58  
59

- 1  
2  
3 52 Okumura Y, Yokoyama K, Matsumoto N, *et al.* Current use of direct oral anticoagulants for atrial  
4 fibrillation in Japan: Findings from the SAKURA AF Registry. *J Arrhythmia* 2017;**33**:289–96.  
5 doi:10.1016/j.joa.2016.11.003  
6  
7 53 Steinberg BA, Shrader P, Pieper K, *et al.* Frequency and Outcomes of Reduced Dose Non–Vitamin  
8 K Antagonist Anticoagulants: Results From ORBIT-AF II (The Outcomes Registry for Better  
9 Informed Treatment of Atrial Fibrillation II). *J Am Heart Assoc* 2018;**7**:e007633.  
10 doi:10.1161/JAHA.117.007633  
11  
12 54 Pisters R, van Vugt SPG, Brouwer MA, *et al.* Real-life use of Rivaroxaban in the Netherlands: data  
13 from the Xarelto for Prevention of Stroke in Patients with Atrial Fibrillation (XANTUS) registry.  
14 *Neth Heart J* 2017;**25**:551–8. doi:10.1007/s12471-017-1009-9  
15  
16 55 Yao X, Shah ND, Sangaralingham LR, *et al.* Non–Vitamin K Antagonist Oral Anticoagulant Dosing  
17 in Patients With Atrial Fibrillation and Renal Dysfunction. *J Am Coll Cardiol* 2017;**69**:2779–90.  
18 doi:10.1016/j.jacc.2017.03.600  
19  
20 56 Reilly PA, Lehr T, Haertter S, *et al.* The Effect of Dabigatran Plasma Concentrations and Patient  
21 Characteristics on the Frequency of Ischemic Stroke and Major Bleeding in Atrial Fibrillation  
22 Patients. *J Am Coll Cardiol* 2014;**63**:321–8. doi:10.1016/j.jacc.2013.07.104  
23  
24 57 Bouillon K, Bertrand M, Boudali L, *et al.* Short-Term Risk of Bleeding During Heparin Bridging at  
25 Initiation of Vitamin K Antagonist Therapy in More Than 90 000 Patients With Nonvalvular Atrial  
26 Fibrillation Managed in Outpatient Care. *J Am Heart Assoc* 2016;**5**:e004065.  
27 doi:10.1161/JAHA.116.004065  
28  
29 58 Chang S-H, Chou I-J, Yeh Y-H, *et al.* Association Between Use of Non–Vitamin K Oral  
30 Anticoagulants With and Without Concurrent Medications and Risk of Major Bleeding in  
31 Nonvalvular Atrial Fibrillation. *JAMA* 2017;**318**:1250. doi:10.1001/jama.2017.13883  
32  
33 59 Van de Werf F, Brueckmann M, Connolly SJ, *et al.* A comparison of dabigatran etexilate with  
34 warfarin in patients with mechanical heart valves: The Randomized, phase II study to Evaluate  
35 the sAfeTy and pharmacokinetics of oraL dabIGatran etexilate in patients after heart valve  
36 replacement (RE-ALIGN). *Am Heart J* 2012;**163**:931–937.e1. doi:10.1016/j.ahj.2012.03.011  
37  
38 60 Steffen M. Universalism, Responsiveness, Sustainability — Regulating the French Health Care  
39 System. *N Engl J Med* 2016;**374**:401–5. doi:10.1056/NEJMp1504547  
40  
41 61 Steinberg BA, Kim S, Thomas L, *et al.* Lack of Concordance Between Empirical Scores and  
42 Physician Assessments of Stroke and Bleeding Risk in Atrial Fibrillation: Results From the  
43 Outcomes Registry for Better Informed Treatment of Atrial Fibrillation (ORBIT-AF) Registry.  
44 *Circulation* 2014;**129**:2005–12. doi:10.1161/CIRCULATIONAHA.114.008643  
45  
46 62 Lafon T, Vallejo C, Hadj M, *et al.* Mésusage et iatrogénie des anticoagulants oraux directs (AOD) :  
47 étude observationnelle dans le service des urgences du CHU de Limoges. *Thérapie* Published  
48 Online First: July 2017. doi:10.1016/j.therap.2017.05.004  
49  
50 63 Pokorney SD, Simon DN, Thomas L, *et al.* Stability of International Normalized Ratios in Patients  
51 Taking Long-term Warfarin Therapy. *JAMA* 2016;**316**:661–3. doi:10.1001/jama.2016.9356  
52  
53  
54  
55  
56  
57  
58  
59  
60

## Figure titles and legends

**Figure 1.** Time trends in the use of oral antithrombotic therapy between 2011 and 2016 in patients with atrial fibrillation in France

Abbreviations: AF: atrial fibrillation; OAC: oral anticoagulant; VKA: vitamin K antagonist; DOAC: direct oral anticoagulant

Legend: For Figures 1.b., 1.d and 1.e., estimates from all AF patients already presented in figure 1.a. are indicated by dashed lines for the purposes of comparison.

**Figure 2.** Patient flow chart.

Abbreviations: OAC: oral anticoagulant; DOAC: direct oral anticoagulant; VKA: vitamin K antagonist; DVT/PE: deep vein thrombosis/pulmonary embolism; AF: atrial fibrillation

**Figure 3.** Potential DOAC underdosing in new users with AF

Abbreviations: DOAC: direct oral anticoagulant; AF: atrial fibrillation

**Table 1. Baseline characteristics of anticoagulant-naïve patients with atrial fibrillation initiating oral anticoagulants in 2015-2016**

| Characteristics (N; %*)                                            | DOAC                   |                          |                       |                          | VKA<br>N= 65,010 |
|--------------------------------------------------------------------|------------------------|--------------------------|-----------------------|--------------------------|------------------|
|                                                                    | Dabigatran<br>N= 9,085 | Rivaroxaban<br>N= 54,456 | Apixaban<br>N= 64,300 | Total DOAC<br>N= 127,841 |                  |
| <b>DOAC: reduced doses</b>                                         | 5,652 (62.2)           | 19,429 (35.7)            | 26,003 (40.4)         | 51,084 (40.0)            | NA               |
| <b>Female sex</b>                                                  | 4,546 (50.0)           | 26,147 (48.0)            | 33,375 (51.9)         | 64,068 (50.1)            | 33,865 (52.1)    |
| <b>Age (years), mean (SD)</b>                                      | 74.1 (11.6)            | 72.8 (11.9)              | 75.3 (11.3)           | 74.1 (11.6)              | 78.0 (11.3)      |
| 18-54                                                              | 548 (6.0)              | 4,007 (7.4)              | 3,172 (4.9)           | 7,727 (6.0)              | 2,361 (3.6)      |
| 55-64                                                              | 1,117 (12.3)           | 7,651 (14.0)             | 7,117 (11.1)          | 15,885 (12.4)            | 5,680 (8.7)      |
| 65-74                                                              | 2,514 (27.7)           | 16,057 (29.5)            | 16,645 (25.9)         | 35,216 (27.5)            | 12,969 (19.9)    |
| 75-79                                                              | 1,554 (17.1)           | 9,053 (16.6)             | 10,692 (16.6)         | 21,299 (16.7)            | 9,587 (14.7)     |
| ≥80                                                                | 3,352 (36.9)           | 17,688 (32.5)            | 26,674 (41.5)         | 47,714 (37.3)            | 34,413 (52.9)    |
| ≥90                                                                | 493 (5.4)              | 2,559 (4.7)              | 4,654 (7.2)           | 7,706 (6.0)              | 8,399 (12.9)     |
| <b>Deprivation index</b>                                           |                        |                          |                       |                          |                  |
| Quintile 1 (least deprived)                                        | 1,394 (15.3)           | 10,265 (18.9)            | 11,266 (17.5)         | 22,925 (17.9)            | 10,263 (15.8)    |
| Quintile 2                                                         | 1,586 (17.5)           | 10,678 (19.6)            | 12,496 (19.4)         | 24,760 (19.4)            | 11,884 (18.3)    |
| Quintile 3                                                         | 1,780 (19.6)           | 10,701 (19.7)            | 12,799 (19.9)         | 25,280 (19.8)            | 12,811 (19.7)    |
| Quintile 4                                                         | 1,917 (21.1)           | 10,794 (19.8)            | 13,142 (20.4)         | 25,853 (20.2)            | 14,272 (22.0)    |
| Quintile 5 (most deprived))                                        | 2,113 (23.3)           | 11,172 (20.5)            | 13,825 (21.5)         | 27,110 (21.2)            | 14,699 (22.6)    |
| Overseas departments                                               | 295 (3.2)              | 846 (1.6)                | 772 (1.2)             | 1,913 (1.5)              | 1,081 (1.7)      |
| <b>First prescriber's specialty</b>                                |                        |                          |                       |                          |                  |
| Hospital practitioner                                              | 3,720 (40.9)           | 22,905 (42.1)            | 29,316 (45.6)         | 55,941 (43.8)            | 39,083 (60.1)    |
| General practitioner                                               | 2,062 (22.7)           | 11,145 (20.5)            | 11,590 (18.0)         | 24,797 (19.4)            | 15,539 (23.9)    |
| Private cardiologist                                               | 3,093 (34.0)           | 18,978 (34.9)            | 21,843 (34.0)         | 43,914 (34.4)            | 8,511 (13.1)     |
| Private orthopaedic surgeon                                        | 16 (0.2)               | 100 (0.2)                | 95 (0.1)              | 211 (0.2)                | 73 (0.1)         |
| Other private specialist                                           | 168 (1.8)              | 1,149 (2.1)              | 1,276 (2.0)           | 2,593 (2.0)              | 1,583 (2.4)      |
| <b>CHA<sub>2</sub>DS<sub>2</sub>-VASc score<sup>†</sup></b>        |                        |                          |                       |                          |                  |
| Mean score (SD)                                                    | 3.7 (1.6)              | 3.5 (1.6)                | 3.9 (1.6)             | 3.7 (1.6)                | 4.5 (1.6)        |
| 0                                                                  | 183 (2.0)              | 1,294 (2.4)              | 847 (1.3)             | 2,324 (1.8)              | 309 (0.5)        |
| 1                                                                  | 635 (7.0)              | 4,854 (8.9)              | 3,637 (5.7)           | 9,126 (7.1)              | 1,607 (2.5)      |
| ≥ 2                                                                | 8,267 (91.0)           | 48,308 (88.7)            | 59,816 (93.0)         | 116,391 (90.1)           | 63,094 (97.0)    |
| C (Heart failure)                                                  | 2,849 (31.4)           | 17,805 (32.7)            | 23,548 (36.6)         | 44,202 (34.6)            | 32,727 (50.3)    |
| H (antihypertensive drugs)                                         | 7,547 (83.1)           | 44,260 (81.3)            | 54,596 (84.9)         | 106,403 (83.2)           | 59,139 (91.0)    |
| D(iabetes)                                                         | 1,959 (21.6)           | 11,279 (20.7)            | 14,087 (21.9)         | 27,325 (21.4)            | 18,806 (28.9)    |
| S(stroke: ATE)                                                     | 1,207 (13.3)           | 4,930 (9.1)              | 8,448 (13.1)          | 14,585 (11.4)            | 10,638 (16.4)    |
| V(ascular diseases)                                                | 2,242 (24.7)           | 13,924 (25.6)            | 18,766 (29.2)         | 34,932 (27.3)            | 28,894 (44.4)    |
| <b>Age≥75 and arterial thromboembolic events<sup>†</sup></b>       | 769 (8.5)              | 3,126 (5.7)              | 5,608 (8.7)           | 9,503 (7.4)              | 7,762 (11.9)     |
| <b>Age&lt;65 and no arterial thromboembolic events<sup>†</sup></b> | 1,510 (16.6)           | 11,074 (20.3)            | 9,396 (14.6)          | 21,980 (17.2)            | 7,035 (10.8)     |

**Table 1. Baseline characteristics of oral anticoagulant-naïve patients with atrial fibrillation initiating oral anticoagulants in 2015-2016 (continued)**

| Characteristics (N; %)                 | DOAC                   |                          |                       |                          | VKA<br>N= 65,010 |
|----------------------------------------|------------------------|--------------------------|-----------------------|--------------------------|------------------|
|                                        | Dabigatran<br>N= 9,085 | Rivaroxaban<br>N= 54,456 | Apixaban<br>N= 64,300 | Total DOAC<br>N= 127,841 |                  |
| <b>HAS-BLED score<sup>†</sup></b>      |                        |                          |                       |                          |                  |
| Mean score (SD)                        | 2.0 (0.9)              | 1.9 (0.9)                | 2.1 (0.9)             | 2.0 (0.9)                | 2.7 (1.0)        |
| ≥ 3                                    | 2,169 (23.9)           | 11,388 (20.9)            | 16,834 (26.2)         | 30,391 (23.8)            | 36,417 (56.0)    |
| <b>A(bnormal)</b>                      |                        |                          |                       |                          |                  |
| Renal function                         | 345 (3.8)              | 2,426 (4.5)              | 3,822 (5.9)           | 6,593 (5.2)              | 14,260 (21.9)    |
| Liver function                         | 169 (1.9)              | 967 (1.8)                | 1,106 (1.7)           | 2,242 (1.8)              | 2,372 (3.6)      |
| <b>B(leeding)</b>                      |                        |                          |                       |                          |                  |
| Predisposition                         | 182 (2.0)              | 1,161 (2.1)              | 1,605 (2.5)           | 2,948 (2.3)              | 5,873 (9.0)      |
| Major bleeding                         | 692 (7.6)              | 3,729 (6.8)              | 5,134 (8)             | 9,555 (7.5)              | 9,348 (14.4)     |
| <b>D(rug/alcohol)</b>                  |                        |                          |                       |                          |                  |
| Alcohol abuse <sup>‡</sup>             | 272 (3.0)              | 1,698 (3.1)              | 1,730 (2.7)           | 3,700 (2.9)              | 2,923 (4.5)      |
| Drug-drug interactions                 | 947 (10.4)             | 5,838 (10.7)             | 7,570 (11.8)          | 14,355 (11.2)            | 23,451 (36.1)    |
| Parenteral anticoagulant (heparin)     | 64 (0.7)               | 331 (0.6)                | 361 (0.6)             | 756 (0.6)                | 9,824 (15.1)     |
| Antiplatelet drugs                     | 826 (9.1)              | 5,225 (9.6)              | 6,951 (10.8)          | 13,002 (10.2)            | 15,433 (23.7)    |
| NSAIDs                                 | 72 (0.8)               | 365 (0.7)                | 344 (0.5)             | 781 (0.6)                | 212 (0.3)        |
| <b>Other comorbidities<sup>‡</sup></b> |                        |                          |                       |                          |                  |
| Ischaemic heart disease                | 1,821 (20.0)           | 11,321 (20.8)            | 15,439 (24.0)         | 28,581 (22.4)            | 23,657 (36.4)    |
| Frailty (proxies)                      | 1,666 (18.3)           | 8,971 (16.5)             | 12,730 (19.8)         | 23,367 (18.3)            | 24,175 (37.2)    |
| Dementia or Parkinson's disease        | 524 (5.8)              | 3,204 (5.9)              | 4,125 (6.4)           | 7,853 (6.1)              | 7,437 (11.4)     |
| Psychiatric disorders                  | 1,722 (19.0)           | 10,593 (19.5)            | 12,844 (20.0)         | 25,159 (19.7)            | 16,598 (25.5)    |
| Smoking <sup>‡</sup>                   | 1,024 (11.3)           | 6,481 (11.9)             | 7,442 (11.6)          | 14,947 (11.7)            | 11,434 (17.6)    |
| <b>Comedications<sup>§</sup></b>       |                        |                          |                       |                          |                  |
| Antiarrhythmics or cardiac glycosides  | 5,996 (66.0)           | 35,761 (65.7)            | 41,031 (63.8)         | 82,788 (64.8)            | 35,600 (54.8)    |
| Lipid-lowering agents                  | 3,913 (43.1)           | 22,250 (40.9)            | 28,812 (44.8)         | 54,975 (43.0)            | 31,903 (49.1)    |
| Oral corticosteroids                   | 1,105 (12.2)           | 6,964 (12.8)             | 8,079 (12.6)          | 16,148 (12.6)            | 8,967 (13.8)     |
| Antiulcer agents                       | 4,295 (47.3)           | 24,842 (45.6)            | 31,469 (48.9)         | 60,606 (47.4)            | 39,842 (61.3)    |
| Polymedication (≥5 ATC classes)        | 3,750 (41.3)           | 21,725 (39.9)            | 28,196 (43.9)         | 53,671 (42.0)            | 45,153 (69.5)    |
| Polymedication (≥10 ATC classes)       | 738 (8.1)              | 4,653 (8.5)              | 6,246 (9.7)           | 11,637 (9.1)             | 14,947 (23.0)    |

DOAC: direct oral anticoagulant; VKA: vitamin K antagonist; SD: standard deviation; ATE: arterial thromboembolic events (ischaemic stroke, arterial systemic embolism or transient ischaemic attack); NSAIDs: non-steroidal anti-inflammatory drugs

\* Unless otherwise stated

<sup>†</sup> Comorbidities were defined using a rolling 1-year period following the initiation of OAC therapy

<sup>‡</sup> Smoking or alcohol data: measured by using proxies such as reimbursements for specific therapy or hospitalizations related to smoking or alcohol consumption/diseases

<sup>§</sup> Comorbidities were defined using a rolling 4-month period preceding the initiation of OAC therapy



**Table 2. Potential inappropriate use of DOAC therapy in oral anticoagulant-naive patients with atrial fibrillation in 2015-2016**

| Characteristics (N; %)                                                             | DOAC                   |                          |                       |                          | VKA<br>N= 65,010     |
|------------------------------------------------------------------------------------|------------------------|--------------------------|-----------------------|--------------------------|----------------------|
|                                                                                    | Dabigatran<br>N= 9,085 | Rivaroxaban<br>N= 54,456 | Apixaban<br>N= 64,300 | Total DOAC<br>N= 127,841 |                      |
| <b>Contraindications or non-approved indication/dose</b>                           | <b>1,457 (16.0)</b>    | <b>8,614 (15.8)</b>      | <b>9,542 (14.8)</b>   | <b>19,613 (15.3)</b>     | <b>NA</b>            |
| Any valvular heart disease                                                         | 649 (7.1)              | 4,146 (7.6)              | 6,122 (9.5)           | 10,917 (8.5)             | 16,461 (25.3)        |
| Prosthetic heart valve                                                             | 106 (1.2)              | 665 (1.2)                | 1,096 (1.7)           | 1,867 (1.5)              | 6,726 (10.3)         |
| Recently hospitalized for coagulopathy, purpura and other haemorrhagic conditions* | 90 (1.0)               | 479 (0.9)                | 596 (0.9)             | 1,165 (0.9)              | 2,142 (3.3)          |
| Liver fibrosis and cirrhosis*                                                      | 50 (0.6)               | 282 (0.5)                | 367 (0.6)             | 699 (0.5)                | 1,174 (1.8)          |
| Recent gastrointestinal ulceration or intracranial haemorrhage†                    | 40 (0.4)               | 120 (0.2)                | 248 (0.4)             | 408 (0.3)                | 350 (0.5)            |
| Recently or currently treated cancer*                                              | 417 (4.6)              | 2,531 (4.6)              | 2,898 (4.5)           | 5,846 (4.6)              | 4,252 (6.5)          |
| Reduced-dose DOAC not approved for stroke prevention in AF patients in Europe      | 357 (3.9)              | 1,844 (3.4)              | NA                    | 2,201 (3.5)              | NA                   |
| <b>Inappropriate use during follow-up‡</b>                                         |                        |                          |                       |                          |                      |
| No monitoring of renal function at initiation                                      | 637 (16.8)             | 3804 (15.5)              | 3642 (14.5)           | 8083 (15.1)              | 5401 (17.0)          |
| No monitoring of renal function in the year post-initiation                        | 378 (10.0)             | 2,347 (9.6)              | 2,138 (8.5)           | 4,863 (9.1)              | 2,984 (9.4)          |
| Non-persistence patterns, N (%)                                                    |                        |                          |                       |                          |                      |
| One reimbursement only                                                             | 605 (15.9)             | 2,666 (10.9)             | 1,771 (7.1)           | 5,042 (9.4)              | 2,426 (7.6)          |
| ≤5 reimbursements                                                                  | 1,229 (32.4)           | 6,557 (26.8)             | 4,515 (18.0)          | 12,301 (23.0)            | 7,456 (23.5)         |
| <b>Concomitant use of drug increasing the risk of bleeding§</b>                    | <b>2,639 (29.3)</b>    | <b>15,797 (29.3)</b>     | <b>18,556 (29.2)</b>  | <b>36,992 (29.3)</b>     | <b>33,025 (52.3)</b> |
| Antiplatelet agents or parenteral anticoagulants                                   | 1,728 (19.2)           | 10,386 (19.3)            | 12,382 (19.5)         | 24,496 (19.4)            | 28,112 (44.5)        |
| Parenteral anticoagulants                                                          | 287 (3.2)              | 1,577 (2.9)              | 1,520 (2.4)           | 3,384 (2.7)              | 12,078 (19.1)        |
| Antiplatelet agents                                                                | 1,490 (16.6)           | 9,179 (17.0)             | 11,170 (17.6)         | 21,839 (17.3)            | 19,710 (31.2)        |
| Aspirin                                                                            | 1,336 (14.8)           | 8,215 (15.2)             | 10,026 (15.8)         | 19,577 (15.5)            | 17,770 (28.1)        |
| NSAIDs                                                                             | 375 (4.2)              | 2,111 (3.9)              | 2,017 (3.2)           | 4,503 (3.6)              | 1,030 (1.6)          |
| SSRIs and SSNRIs                                                                   | 836 (9.3)              | 4,852 (9.0)              | 5,880 (9.2)           | 11,568 (9.1)             | 7,317 (11.6)         |

DOAC: direct oral anticoagulant; VKA: vitamin K antagonist; AF: atrial fibrillation; NA: not applicable; NSAIDs: non-steroidal anti-inflammatory drugs; SSRIs: selective serotonin reuptake inhibitors and SSNRIs: selective serotonin-norepinephrine reuptake inhibitors

\* Comorbidities identified using hospitalization and/or LTD data, and/or specific procedures during a rolling 1-year period preceding the initiation of OAC therapy

† Comorbidities identified using hospitalization data during a rolling 6-week period preceding the initiation of OAC therapy

‡ Data on patients with at least a one year of follow-up i.e. patients initiating OAC in 2015 after excluding patients who died and those hospitalized for 3 months or longer (N= 3,796; 24,483; 25,118; 53,397 and 31,777 for dabigatran-, rivaroxaban, apixaban, total DOAC- and total VKA new users, respectively); period considered (unless otherwise stated): rolling 1-year period following the initiation of OAC therapy (index date included)

§ Data for new users still alive after a 45-day period following the index date (N= 9,001; 53,885; 63,578; 126,464 and 63,180 for dabigatran-, rivaroxaban, apixaban, total DOAC- and total VKA new users , respectively); period considered: rolling 6-week period following the initiation of OAC therapy (index date included)

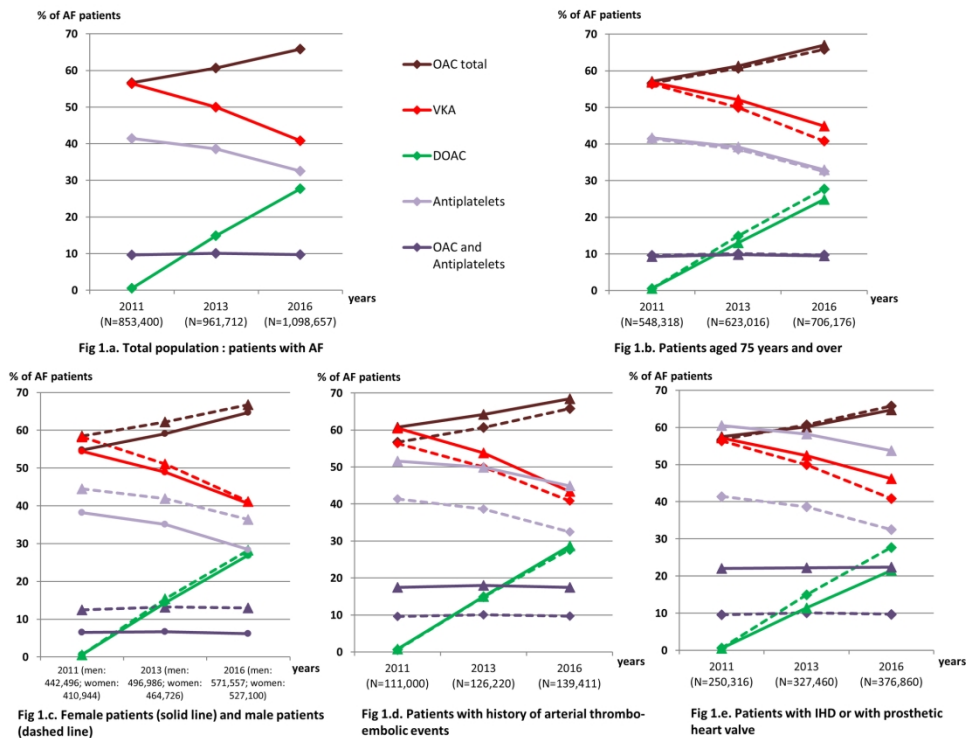

Figure 1

190x142mm (300 x 300 DPI)

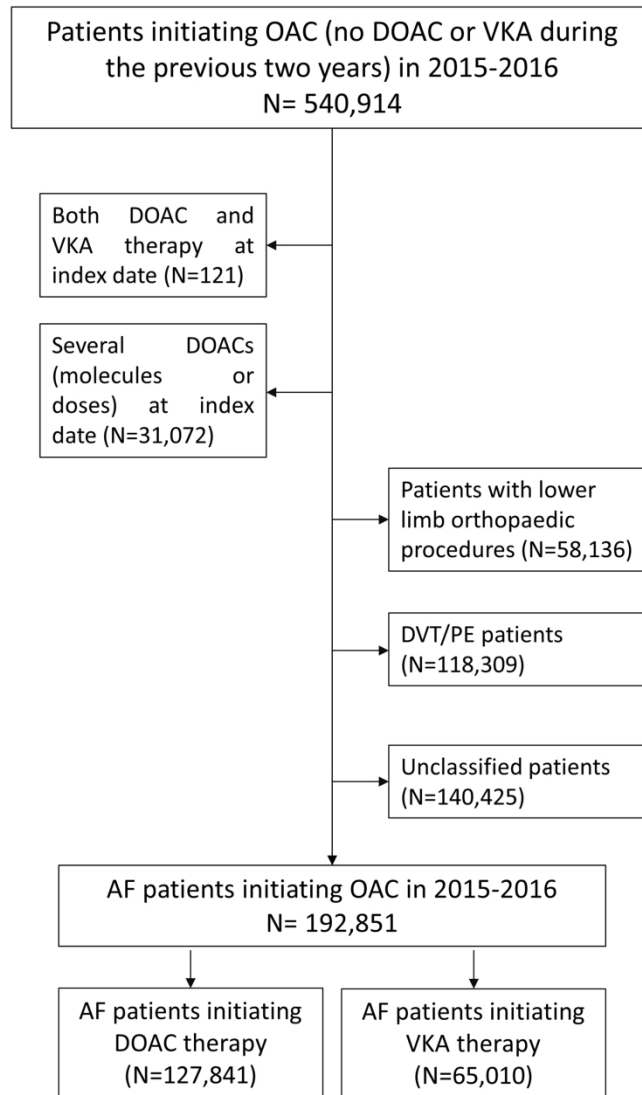

Figure 2

254x338mm (300 x 300 DPI)

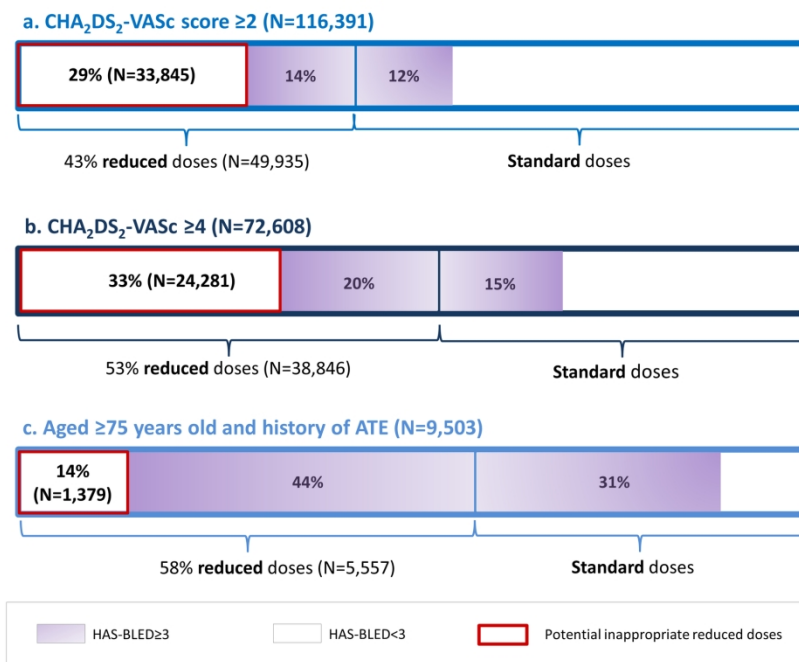

Figure 3

190x142mm (300 x 300 DPI)

1  
2  
3  
4  
5  
6  
7  
8  
9  
10  
11  
12  
13  
14  
15  
16  
17  
18  
19  
20  
21  
22  
23  
24  
25  
26  
27  
28  
29  
30  
31  
32  
33  
34  
35  
36  
37  
38  
39  
40  
41  
42  
43  
44  
45  
46  
47

**Supplementary Materials**

Supplementary Table 1. Definitions used to identify comorbid conditions and comedications in the French healthcare databases.

Supplementary Table 2. Comparison of selected baseline characteristics of DOAC new users with AF at risk of stroke according to level of HAS-BLED score and type of DOAC dose.

For peer review only

**Supplementary Table 1. Definitions used to identify comorbid conditions and comedICATIONS in the SNIRAM-PMSI databases.**

| Covariates*                                                                               | Hospital discharge diagnoses†                                                                                                                               | LTD diagnoses†          | Specific procedures or drug reimbursements                                                                                                                                            |
|-------------------------------------------------------------------------------------------|-------------------------------------------------------------------------------------------------------------------------------------------------------------|-------------------------|---------------------------------------------------------------------------------------------------------------------------------------------------------------------------------------|
| <b>AF definition (Patterns of use of DOAC therapy in new users with AF)</b>               |                                                                                                                                                             |                         |                                                                                                                                                                                       |
| Nonvalvular atrial fibrillation                                                           | I48                                                                                                                                                         | I48                     | Radiofrequency ablation, cardioversion                                                                                                                                                |
| Lower limb orthopaedic procedures                                                         |                                                                                                                                                             |                         | Lower limb orthopaedic surgery or procedures                                                                                                                                          |
| History of valvular heart disease/Prosthetic heart valve                                  | I05-I09, I33-I39/ Z95.2, Z95.3 ou Z95.4                                                                                                                     |                         | Heart valve surgery                                                                                                                                                                   |
| Deep vein thrombosis/pulmonary embolism                                                   | I26, I80 (except I80.0), I81, I82                                                                                                                           | I26, I80-I82            | Lower limb venous ultrasonography, pulmonary/lower limb angiography, ventilation/perfusion scan                                                                                       |
| <b>CHA<sub>2</sub>DS<sub>2</sub>-VASc and HAS-BLED scores</b>                             |                                                                                                                                                             |                         |                                                                                                                                                                                       |
| Heart failure                                                                             | I50 or I11.0, I13.0, I13.2, I13.9, K76.1, J81 related to I50                                                                                                | I50                     | Specific medications approved for heart failure including beta-blockers (bisoprolol, carvedilol, metoprolol), eplerenone, bumetanide, furosemide when licensed for heart failure only |
| Antihypertensive drugs                                                                    |                                                                                                                                                             |                         | Diuretics, beta blockers, calcium channel blockers, agents acting on the renin-angiotensin system and other antiadrenergic agents                                                     |
| Diabetes                                                                                  | E10-E14                                                                                                                                                     | E10-E14                 | Insulins and blood glucose lowering drugs                                                                                                                                             |
| History of ATE (ischemic stroke, arterial systemic embolism or transient ischemic attack) | I63 (except I63.6), G46 related to I63 or I69.3; I74, G45 (except G45.4)                                                                                    | I63, I74, G45           |                                                                                                                                                                                       |
| Peripheral vascular disease                                                               | I20, I21, I22, I23, I24, I25, I70, I71, I72, I73, E10.5, E11.5, E12.5, E13.5, E14.5                                                                         | I70-I73, I20-I25        |                                                                                                                                                                                       |
| Abnormal renal function                                                                   | N18, I12.0, I13.1, I13.2, E10.2, E11.2, E13.2, E14.2, N08.3                                                                                                 | N18, I12                |                                                                                                                                                                                       |
| Abnormal liver function                                                                   | R18, I85, K70, K71.3, K71.4, K71.5, K71.7, K72.1, K73, K74, K76.1, B18, C22, C78.7                                                                          | K70, K73, K74, B18, C22 | Antiviral agents for systemic use HCV (ribavirin, [peg]interferon alpha and DAA), and against HCB ([peg]interferon alpha and NnRTIs).                                                 |
| Major bleeding                                                                            | I60-I62, S06.3-S06.6, I85, K25-K29, K62.5, K92, D62, N02, R31, R58, H11.3, H35.6, H43.1, H45.0, H92.2, J94.2, K66.1, M25.0, N92, N93.8, N93.9, N95.0, R04.0 |                         |                                                                                                                                                                                       |
| Predisposition for bleeding                                                               | Anemias : D50, D51, D52, D53, D55, D56, D57, D58, D59, D60, D62, D63, D64 or coagulation defects, purpura and other hemorrhagic: D65, D66, D67, D68, D69    |                         |                                                                                                                                                                                       |
| Alcohol abuse                                                                             | F10, K70, T51, K6, G31.2, G62.1, G72.1, I42.6, K29.2, Z71.4, Z72.1, Z50.2.                                                                                  |                         | disulfiram, acamprosate, nalmefene and products with naltrexone licensed in adult patients with alcohol dependence                                                                    |
| Drug-drug interaction                                                                     |                                                                                                                                                             |                         | Platelet aggregation inhibitors (including low-dose acetylsalicylic acid ), heparins, NSAIDs                                                                                          |
| <b>Other comorbidities</b>                                                                |                                                                                                                                                             |                         |                                                                                                                                                                                       |
| Ischemic heart disease (including myocardial infarction)                                  | I20-I25                                                                                                                                                     | I20-I25                 | Nitrovasodilator agents                                                                                                                                                               |
| Frailty                                                                                   | G81-G83                                                                                                                                                     | G81-G83                 | Home hospital bed, wheelchair, high level of nursing home stay                                                                                                                        |
| Dementia or Parkinson's disease                                                           | F00-F03, G30, G20                                                                                                                                           | F00-F03, G30, G20       | Anticholinesterases or NMDA receptor antagonists: anticholinergic and dopaminergic agents                                                                                             |
| Psychiatric disorders                                                                     | F20-29, F30-39                                                                                                                                              | F20-29, F30-39          | Antidepressants, antipsychotics, conventional mood stabilizers                                                                                                                        |
| Smoking                                                                                   | F17, Z71.6, Z72.0; J43-J44                                                                                                                                  | J43-J44                 | Nicotine replacement therapy                                                                                                                                                          |
| Recently hospitalized for coagulopathy, purpura and other haemorrhagic conditions         | D65-D69                                                                                                                                                     |                         |                                                                                                                                                                                       |
| Liver fibrosis and cirrhosis                                                              | K70.0, K70.2, K70.3, K70.4, K71.7, K72, K74                                                                                                                 |                         |                                                                                                                                                                                       |

1  
2  
3  
4  
5  
6  
7  
8  
9  
10  
11  
12  
13  
14  
15  
16  
17  
18  
19  
20  
21  
22  
23  
24  
25  
26  
27  
28  
29  
30  
31  
32  
33  
34  
35  
36  
37  
38  
39  
40  
41  
42  
43  
44  
45  
46  
47

|                                                                |                                                               |                  |                                                                         |
|----------------------------------------------------------------|---------------------------------------------------------------|------------------|-------------------------------------------------------------------------|
| Recent gastrointestinal ulceration or intracranial haemorrhage | K25, K26, K27, K28, K29.0, I60, I61, I62, S06.4, S06.5, S06.6 |                  |                                                                         |
| Recently or currently treated cancer                           | C00-D09, D37-D48, Z510, Z511                                  | C00-D09, D37-D48 | Radiotherapy procedures                                                 |
| <b>Baseline comedications</b>                                  |                                                               |                  |                                                                         |
| Antiarrhythmics and cardiac glycosides                         |                                                               |                  | Antiarrhythmics: class I and III, verapamil, digitalis glycosides       |
| Lipid-lowering agents                                          |                                                               |                  | HMG CoA reductase inhibitors, fibrates, ezetimibe                       |
| Antiplatelet drugs                                             |                                                               |                  | Platelet aggregation inhibitors including low-dose acetylsalicylic acid |
| Oral corticosteroids                                           |                                                               |                  | Mineralo- and gluco-corticoids                                          |
| Antiulcer agents                                               |                                                               |                  | Mainly proton pump inhibitors and H2-receptor antagonists               |

LTD: long-term diseases; ATE: arterial thromboembolic events (mainly stroke); DVT/PE: deep vein thrombosis/pulmonary embolism; NMDA: N-methyl-D-aspartate; HIV: human immunodeficiency virus; PI: Protease inhibitor; NNRTIs: Non-nucleoside reverse transcriptase inhibitors; NnRTI: Nucleoside and nucleotide reverse transcriptase inhibitors; DAA: direct-acting antiviral; HMG CoA: 3-hydroxy-3-methyl-glutaryl-CoA; NSAIDs: Non-steroidal anti-inflammatory drugs.

\* Comorbidities were identified using ICD-10 diagnosis codes for hospital discharge/LTD, or specific procedures, or drug reimbursements. Concomitant medications were identified as those dispensed at least once during the 4-month period preceding the index date. Influenza vaccination was determined during the first 'flu vaccination campaign preceding the index date.  
†ICD-10 codes

For peer review only

**Supplementary Table 2. Comparison of selected baseline characteristics of DOAC new users with AF at risk of stroke according to level of HAS-BLED score and type of DOAC dose**

| N (%)                                         | Patients with CHA2DS2-VASc $\geq 2$ (N=116,391) |                               |                              |                               | Patients aged $\geq 75$ years old and history of ATE (N=9,503) |                              |                             |                            |
|-----------------------------------------------|-------------------------------------------------|-------------------------------|------------------------------|-------------------------------|----------------------------------------------------------------|------------------------------|-----------------------------|----------------------------|
|                                               | HAS-BLED $\geq 3$ (N=30 273)                    |                               | HAS-BLED $<3$ (N=86 118)     |                               | HAS-BLED $\geq 3$ (N=7,143)                                    |                              | HAS-BLED $<3$ (N=2,360)     |                            |
|                                               | Reduced doses*<br>(N=16,090)                    | Standard doses*<br>(N=14,183) | Reduced doses*<br>(N=33,845) | Standard doses*<br>(N=52,273) | Reduced doses*<br>(N=4,178)                                    | Standard doses*<br>(N=2,965) | Reduced doses*<br>(N=1,379) | Standard doses*<br>(N=981) |
| Age (years), mean                             | 81.8                                            | 74.8                          | 81.3                         | 70.9                          | 84.8                                                           | 81.1                         | 81.3                        | 70.9                       |
| Age $\geq 80$ years                           | 10,786 (67.0)                                   | 3,982 (28.1)                  | 22,962 (67.8)                | 9,984 (19.1)                  | 3,496 (83.7)                                                   | 1,720 (58.0)                 | 1,188 (86.1)                | 567 (57.8)                 |
| First prescriber's specialty                  |                                                 |                               |                              |                               |                                                                |                              |                             |                            |
| Hospital practitioner or private cardiologist | 12,315 (76.6)                                   | 11,364 (80.1)                 | 25,221 (74.5)                | 41,728 (79.8)                 | 3216 (77.0)                                                    | 2965 (80.2)                  | 1013 (73.5)                 | 798 (81.3)                 |
| General practitioner                          | 3321 (20.6)                                     | 2426 (17.1)                   | 7836 (23.2)                  | 9302 (17.8)                   | 860 (20.6)                                                     | 503 (17.0)                   | 322 (23.4)                  | 157 (16.0)                 |
| Frailty (proxies)                             | 6,689 (41.6)                                    | 4,600 (32.4)                  | 6,932 (20.5)                 | 4,779 (9.1)                   | 2,599 (62.2)                                                   | 1,642 (55.4)                 | 589 (42.7)                  | 316 (32.2)                 |
| Dementia or Parkinson's disease               | 2121 (13.2)                                     | 935 (6.6)                     | 3169 (9.4)                   | 1555 (3.0)                    | 789 (18.9)                                                     | 355 (12.0)                   | 259 (18.8)                  | 111 (11.3)                 |
| Any valvular diseases†                        | 2,640 (16.4)                                    | 1,809 (12.8)                  | 2,740 (8.1)                  | 3,342 (6.4)                   | 566 (13.5)                                                     | 330 (11.1)                   | 144 (10.4)                  | 95 (9.7)                   |
| Prosthetic heart valve†                       | 544 (3.4)                                       | 384 (2.7)                     | 425 (1.3)                    | 474 (0.9)                     | 94 (2.2)                                                       | 52 (1.8)                     | 19 (1.4)                    | 14 (1.4)                   |
| Ischaemic heart disease                       | 7,232 (44.9)                                    | 5,274 (37.2)                  | 6,827 (20.2)                 | 9,142 (17.5)                  | 1,338 (32.0)                                                   | 758 (25.6)                   | 336 (24.4)                  | 185 (18.9)                 |
| Antiplatelet agents at initiation             | 6,035 (37.5)                                    | 4,891 (34.5)                  | 620 (1.8)                    | 1,264 (2.4)                   | 874 (20.9)                                                     | 510 (17.2)                   | 11 (0.8)                    | 7 (0.7)                    |
| Lipid-lowering agents                         | 9252 (57.5)                                     | 9213 (65.0)                   | 12836 (37.9)                 | 21820 (41.7)                  | 2606 (62.4)                                                    | 2132 (71.9)                  | 697 (50.5)                  | 611 (62.3)                 |
| Polymedication ( $\geq 10$ ATC classes)       | 3,627 (22.5)                                    | 2,946 (20.8)                  | 2,150 (6.4)                  | 2,798 (5.4)                   | 788 (18.9)                                                     | 473 (16.0)                   | 104 (7.5)                   | 67 (6.8)                   |

\* Reduced-dose DOAC: dabigatran 150mg, Rivaroxaban 20 and apixaban 5mg; reduced-dose DOAC: dabigatran 75mg and 110mg, rivaroxaban 10mg and 15mg and apixaban 2.5mg

† Covariates defined by hospitalization data only



## STROBE Statement—checklist of items that should be included in reports of observational studies

|                              | Item No | Recommendation                                                                                                                                                                                                                                                                                                                                                                                                                                                         | Page No  |
|------------------------------|---------|------------------------------------------------------------------------------------------------------------------------------------------------------------------------------------------------------------------------------------------------------------------------------------------------------------------------------------------------------------------------------------------------------------------------------------------------------------------------|----------|
| <b>Title and abstract</b>    | 1       | (a) Indicate the study's design with a commonly used term in the title or the abstract                                                                                                                                                                                                                                                                                                                                                                                 | 1        |
|                              |         | (b) Provide in the abstract an informative and balanced summary of what was done and what was found                                                                                                                                                                                                                                                                                                                                                                    | 2        |
| <b>Introduction</b>          |         |                                                                                                                                                                                                                                                                                                                                                                                                                                                                        |          |
| Background/rationale         | 2       | Explain the scientific background and rationale for the investigation being reported                                                                                                                                                                                                                                                                                                                                                                                   | 4        |
| Objectives                   | 3       | State specific objectives, including any prespecified hypotheses                                                                                                                                                                                                                                                                                                                                                                                                       | 4        |
| <b>Methods</b>               |         |                                                                                                                                                                                                                                                                                                                                                                                                                                                                        |          |
| Study design                 | 4       | Present key elements of study design early in the paper                                                                                                                                                                                                                                                                                                                                                                                                                | 5,6      |
| Setting                      | 5       | Describe the setting, locations, and relevant dates, including periods of recruitment, exposure, follow-up, and data collection                                                                                                                                                                                                                                                                                                                                        | 5        |
| Participants                 | 6       | (a) <i>Cohort study</i> —Give the eligibility criteria, and the sources and methods of selection of participants. Describe methods of follow-up<br><i>Case-control study</i> —Give the eligibility criteria, and the sources and methods of case ascertainment and control selection. Give the rationale for the choice of cases and controls<br><i>Cross-sectional study</i> —Give the eligibility criteria, and the sources and methods of selection of participants | 5,6      |
|                              |         | (b) <i>Cohort study</i> —For matched studies, give matching criteria and number of exposed and unexposed<br><i>Case-control study</i> —For matched studies, give matching criteria and the number of controls per case                                                                                                                                                                                                                                                 | NA       |
| Variables                    | 7       | Clearly define all outcomes, exposures, predictors, potential confounders, and effect modifiers. Give diagnostic criteria, if applicable                                                                                                                                                                                                                                                                                                                               | 6        |
| Data sources/<br>measurement | 8*      | For each variable of interest, give sources of data and details of methods of assessment (measurement). Describe comparability of assessment methods if there is more than one group                                                                                                                                                                                                                                                                                   | 6,7,8    |
| Bias                         | 9       | Describe any efforts to address potential sources of bias                                                                                                                                                                                                                                                                                                                                                                                                              | 7,8      |
| Study size                   | 10      | Explain how the study size was arrived at                                                                                                                                                                                                                                                                                                                                                                                                                              | 9, Fig 2 |
| Quantitative variables       | 11      | Explain how quantitative variables were handled in the analyses. If applicable, describe which groupings were chosen and why                                                                                                                                                                                                                                                                                                                                           | 7        |
| Statistical methods          | 12      | (a) Describe all statistical methods, including those used to control for confounding                                                                                                                                                                                                                                                                                                                                                                                  | 7,8      |
|                              |         | (b) Describe any methods used to examine subgroups and interactions                                                                                                                                                                                                                                                                                                                                                                                                    | 7,8      |
|                              |         | (c) Explain how missing data were addressed                                                                                                                                                                                                                                                                                                                                                                                                                            | NA       |
|                              |         | (d) <i>Cohort study</i> —If applicable, explain how loss to follow-up was addressed<br><i>Case-control study</i> —If applicable, explain how matching of cases and controls was addressed<br><i>Cross-sectional study</i> —If applicable, describe analytical methods taking account of sampling strategy                                                                                                                                                              | NA       |
|                              |         | (e) Describe any sensitivity analyses                                                                                                                                                                                                                                                                                                                                                                                                                                  | 7,8      |

Continued on next page

| <b>Results</b>           |     |                                                                                                                                                                                                              |                     |
|--------------------------|-----|--------------------------------------------------------------------------------------------------------------------------------------------------------------------------------------------------------------|---------------------|
| Participants             | 13* | (a) Report numbers of individuals at each stage of study—eg numbers potentially eligible, examined for eligibility, confirmed eligible, included in the study, completing follow-up, and analysed            | 9<br>Fig 2          |
|                          |     | (b) Give reasons for non-participation at each stage                                                                                                                                                         | 9                   |
|                          |     | (c) Consider use of a flow diagram                                                                                                                                                                           | Fig 2               |
| Descriptive data         | 14* | (a) Give characteristics of study participants (eg demographic, clinical, social) and information on exposures and potential confounders                                                                     | Table 1             |
|                          |     | (b) Indicate number of participants with missing data for each variable of interest                                                                                                                          | NA                  |
|                          |     | (c) <i>Cohort study</i> —Summarise follow-up time (eg, average and total amount)                                                                                                                             | NA                  |
| Outcome data             | 15* | <i>Cohort study</i> —Report numbers of outcome events or summary measures over time                                                                                                                          | NA                  |
|                          |     | <i>Case-control study</i> —Report numbers in each exposure category, or summary measures of exposure                                                                                                         | NA                  |
|                          |     | <i>Cross-sectional study</i> —Report numbers of outcome events or summary measures                                                                                                                           | Fig 2, 3<br>Table 2 |
| Main results             | 16  | (a) Give unadjusted estimates and, if applicable, confounder-adjusted estimates and their precision (eg, 95% confidence interval). Make clear which confounders were adjusted for and why they were included | Table 2             |
|                          |     | (b) Report category boundaries when continuous variables were categorized                                                                                                                                    | Table 2             |
|                          |     | (c) If relevant, consider translating estimates of relative risk into absolute risk for a meaningful time period                                                                                             | NA                  |
| Other analyses           | 17  | Report other analyses done—eg analyses of subgroups and interactions, and sensitivity analyses                                                                                                               | 9, 10               |
| <b>Discussion</b>        |     |                                                                                                                                                                                                              |                     |
| Key results              | 18  | Summarise key results with reference to study objectives                                                                                                                                                     | 11                  |
| Limitations              | 19  | Discuss limitations of the study, taking into account sources of potential bias or imprecision. Discuss both direction and magnitude of any potential bias                                                   | 13                  |
| Interpretation           | 20  | Give a cautious overall interpretation of results considering objectives, limitations, multiplicity of analyses, results from similar studies, and other relevant evidence                                   | 11, 12              |
| Generalisability         | 21  | Discuss the generalisability (external validity) of the study results                                                                                                                                        | 12                  |
| <b>Other information</b> |     |                                                                                                                                                                                                              |                     |
| Funding                  | 22  | Give the source of funding and the role of the funders for the present study and, if applicable, for the original study on which the present article is based                                                | 14                  |

\*Give information separately for cases and controls in case-control studies and, if applicable, for exposed and unexposed groups in cohort and cross-sectional studies.

**Note:** An Explanation and Elaboration article discusses each checklist item and gives methodological background and published examples of transparent reporting. The STROBE checklist is best used in conjunction with this article (freely available on the Web sites of PLoS Medicine at <http://www.plosmedicine.org/>, Annals of Internal Medicine at <http://www.annals.org/>, and Epidemiology at <http://www.epidem.com/>). Information on the STROBE Initiative is available at [www.strobe-statement.org](http://www.strobe-statement.org).

# BMJ Open

## Oral anticoagulation therapy use in patients with atrial fibrillation after the introduction of non-vitamin K antagonist oral anticoagulants: findings from the French healthcare databases, 2011-2016

|                                 |                                                                                                                                                                                                                                                                                                                                                                                                                                                                                                                                                                                                                                                                                                                                                                                                                                                                                                                                                                             |
|---------------------------------|-----------------------------------------------------------------------------------------------------------------------------------------------------------------------------------------------------------------------------------------------------------------------------------------------------------------------------------------------------------------------------------------------------------------------------------------------------------------------------------------------------------------------------------------------------------------------------------------------------------------------------------------------------------------------------------------------------------------------------------------------------------------------------------------------------------------------------------------------------------------------------------------------------------------------------------------------------------------------------|
| Journal:                        | <i>BMJ Open</i>                                                                                                                                                                                                                                                                                                                                                                                                                                                                                                                                                                                                                                                                                                                                                                                                                                                                                                                                                             |
| Manuscript ID                   | bmjopen-2018-026645.R1                                                                                                                                                                                                                                                                                                                                                                                                                                                                                                                                                                                                                                                                                                                                                                                                                                                                                                                                                      |
| Article Type:                   | Research                                                                                                                                                                                                                                                                                                                                                                                                                                                                                                                                                                                                                                                                                                                                                                                                                                                                                                                                                                    |
| Date Submitted by the Author:   | 03-Jan-2019                                                                                                                                                                                                                                                                                                                                                                                                                                                                                                                                                                                                                                                                                                                                                                                                                                                                                                                                                                 |
| Complete List of Authors:       | MAURA, Géric; French National Health Insurance (Caisse Nationale de l'Assurance Maladie/Cnam), Department of Studies in Public Health; University of Bordeaux, Inserm, Bordeaux Population Health Research Center, team Pharmacoepidemiology - UMR 1219, Billionnet, Cécile; French National Health Insurance (Caisse Nationale de l'Assurance Maladie/Cnam), Department of Studies in Public Health Drouin, Jérôme; French National Health Insurance (Caisse Nationale de l'Assurance Maladie/Cnam), Department of Studies in Public Health Weill, Alain; French National Health Insurance (Caisse Nationale de l'Assurance Maladie/Cnam), Department of Studies in Public Health Neumann, Anke; French National Health Insurance (Caisse Nationale de l'Assurance Maladie/Cnam), Department of Studies in Public Health Pariente, Antoine; University of Bordeaux, Inserm, Bordeaux Population Health Research Center, team Pharmacoepidemiology - UMR 1219; CHU Bordeaux |
| <b>Primary Subject Heading</b>: | Cardiovascular medicine                                                                                                                                                                                                                                                                                                                                                                                                                                                                                                                                                                                                                                                                                                                                                                                                                                                                                                                                                     |
| Secondary Subject Heading:      | Cardiovascular medicine, Epidemiology, Pharmacology and therapeutics, Public health                                                                                                                                                                                                                                                                                                                                                                                                                                                                                                                                                                                                                                                                                                                                                                                                                                                                                         |
| Keywords:                       | Anticoagulation < HAEMATOLOGY, EPIDEMIOLOGY, PUBLIC HEALTH, dabigatran, rivaroxaban, apixaban                                                                                                                                                                                                                                                                                                                                                                                                                                                                                                                                                                                                                                                                                                                                                                                                                                                                               |
|                                 |                                                                                                                                                                                                                                                                                                                                                                                                                                                                                                                                                                                                                                                                                                                                                                                                                                                                                                                                                                             |

SCHOLARONE™  
Manuscripts

**Title page**

**Oral anticoagulation therapy use in patients with atrial fibrillation after the introduction of non-vitamin K antagonist oral anticoagulants: findings from the French healthcare databases, 2011-2016.**

**Running title:** Patterns of OAC use

Géric Maura PharmD, PhD<sup>1,2</sup>, Cécile Billionnet MSc, PhD<sup>1</sup>, Jérôme Drouin, MSc<sup>1</sup>, Alain Weill MD<sup>1</sup>,  
Anke Neumann MSc, PhD<sup>1</sup>, Antoine Pariente MD, PhD<sup>2,3</sup>

<sup>1</sup> Department of Studies in Public Health, French National Health Insurance (Caisse Nationale de l'Assurance Maladie/Cnam), 75 986 Paris Cedex 20, France.

<sup>2</sup> University of Bordeaux, Inserm, Bordeaux Population Health Research Center, team  
Pharmacoepidemiology - UMR 1219, F-33000 Bordeaux, France

<sup>3</sup> CHU de Bordeaux, Pharmacologie, F-33000 Bordeaux, France

**Address for correspondence:** Géric MAURA, Cnam/DSES/DESP, National Health Insurance, 50 avenue du Pr. André Lemierre, 75986 Paris cedex 20; E-mail: [geric.maura@assurance-maladie.fr](mailto:geric.maura@assurance-maladie.fr); Telephone: +33(0)172602338; Fax: +33(0)172601724

Word count of text: (excluding the title page, abstract, tables, acknowledgements, contributions and references): 4,186

Word count of abstract: 300/300

Number of references: 64

Number of tables: 2

Number of figures: 3

Number of supplementary tables: 3

## Abstract

**Objectives:** To describe i) the trend in oral anticoagulant (OAC) use following the introduction of Non-vitamin K antagonist oral anticoagulant (NOAC) therapy for stroke prevention in atrial fibrillation (AF) patients; ii) the current patterns of use of NOAC therapy in new users with AF in France.

**Design:** i) Repeated cross-sectional study; ii) Population-based cohort study.

**Setting:** French National Healthcare databases (50 million beneficiaries).

**Participants:** i) Patients with identified AF in 2011, 2013, and 2016; ii) Patients with AF initiating OAC therapy in 2015-2016.

**Primary and secondary outcome measures:** i) Trend in oral anticoagulant therapy use in patients with AF; ii) Patterns of use of NOAC therapy in new users with AF.

**Results:** Between 2011 and 2016, use of OAC therapy moderately increased (+16%), while use of antiplatelet therapy decreased (-22%) among all patients with identified AF. In 2016, among the 1.1 million AF patients, 66% used OAC therapy and were more likely to be treated by VKA than NOAC therapy, including patients at higher risk of stroke (63.5%), while 33% used antiplatelet therapy. Among 192,851 new users of OAC therapy in 2015-2016 with identified AF, NOAC therapy (66.3%) was initiated more frequently than VKA therapy, including in patients at higher risk of stroke (57.8%). Reduced doses were prescribed in 40% of NOAC new users. Several situations of inappropriate use at NOAC initiation were identified, including concomitant use of drugs increasing the risk of bleeding (one in three new users) and potential NOAC underdosing.

**Conclusions:** OAC therapy use in AF patients remains suboptimal 4 years after the introduction of NOACs for stroke prevention in France and improvement in appropriate prescribing regarding NOAC initiation is needed. However, NOAC therapy is now the preferred drug class for initiation of OAC therapy in patients with AF, including in patients at higher risk of stroke.

#### Strengths and limitations of this study

- This study is the first to report both the 2011-2016 trend in oral anticoagulant (OAC) coverage in patients with atrial fibrillation (AF) following the introduction of Non-vitamin K antagonist oral anticoagulant (NOAC) therapy in France and the current patterns of use of NOACs in new users including assessment of potential inappropriate use;
- This study is based on reimbursement data for 50 million beneficiaries with access to all OAC prescriptions filled in the ambulatory setting;
- As indications for treatment are not available in the databases, AF was mostly identified on the basis of discharge and long-term disease diagnosis codes and an algorithm previously validated in the French healthcare databases that helped to further identify AF in outpatients.

## Introduction

Non-vitamin K antagonist Oral AntiCoagulants (NOACs) have been gradually introduced over the past decade as a more convenient, fixed-dose alternative to vitamin K antagonists (VKAs), the only oral anticoagulant therapy available up until now for long-term stroke prevention in patients with non-valvular atrial fibrillation (AF) [1]. Compared to VKA, NOAC therapy avoids the need for regular laboratory monitoring of patients by INR testing due to a wider therapeutic window, allows once (rivaroxaban, edoxaban) or twice (dabigatran, apixaban) daily intake and is associated with fewer drug-drug interactions to date [2–6]. NOACs have been demonstrated to have similar or superior efficacy to warfarin for stroke prevention in nv-AF patients, and these findings have recently been implemented in the 2016 European Society of Cardiology (ESC) guidelines that recommended NOAC over VKA therapy in this indication [7]. Moreover, antiplatelet therapy is no longer recommended in these patients [7,8]. The use of NOAC therapy, massively adopted worldwide including in France [9–15], is expected to overcome the suboptimal use of oral anticoagulant (OAC) therapy extensively reported with VKA therapy, including underprescribing and high discontinuation rates [16,17].

Despite their improved ease of use, NOAC prescribed dose needs to be adjusted to the patient's clinical profile with regards to age, renal function, weight, and risks of bleeding and drug-drug interactions. Two dose regimens are therefore proposed for each NOAC: standard dose regimen (*i.e.* dabigatran 150mg/12h, rivaroxaban 20mg/24h; apixaban 5mg/12h), and reduced-dose regimen (*i.e.* dabigatran 75mg or 110mg/12h, rivaroxaban 10mg or 15mg/24h; apixaban 2.5mg/12h). The reasons for prescribing a reduced-dose regimen are listed in the summary of product characteristics (SmPCs) of each NOAC with differences across NOACs as well as in the ESC [7,8] and European Heart Rhythm Association (EHRA) guidelines [18]. Recent publications have suggested that the frequency of use of reduced-dose NOACs in clinical practice could largely exceed that expected on the basis of the conditions summarized in these guidelines [11,19–21]. However, national data are lacking concerning the current French patterns of NOAC use, including the potential issue of NOAC underdosing.

A steady increase in the initiation of NOAC therapy has already been reported in AF patients in France [14], but trends in OAC coverage of AF patients following the introduction of NOACs and a description of the current national patterns of NOAC use have not yet been reported. This study, based on the French nationwide healthcare databases, therefore had a twofold objective: 1) to describe the trends in OAC use following the introduction of NOAC for stroke prevention in AF patients during the 2011-2016 period; 2) to describe the current patterns of use of OAC therapies with particular focus on NOAC use in new users with AF.

## Methods

### Data source

French national health insurance (*Assurance Maladie*) covers the entire French population by means of several specific schemes according to the beneficiary's occupational sector, the largest scheme being the '*Régime général*' (around 50 million beneficiaries).

This study was conducted using data from the French health insurance system database (*Système national d'information inter-régimes de l'Assurance maladie*, SNIIRAM) linked to the French hospital discharge database (*Programme de médicalisation des systèmes d'information*, PMSI) [22,23]. The SNIIRAM database contains individualized, anonymous, and comprehensive data on health spending reimbursements. Demographic data include date of birth, gender, and vital status. Drugs are coded according to the Anatomical Therapeutic Chemical (ATC) classification. Each packaging of each product is identified by means of a national specific pack identifier code providing information on the name of the product, active ingredient and dose per unit, number of units, and route of administration; but, the exact dosage prescribed and the indication are not available. However, for most drugs, particularly OACs, each dispensing of the prescribed drug cannot exceed the quantity necessary for one month of treatment. The PMSI database provides detailed information about discharge diagnoses and medical procedures related to all hospitalizations in France. This information regarding morbidities is completed by diagnoses corresponding to patient eligibility for 100% reimbursement of severe and costly long-term diseases (LTD) and disability, such as AF, coronary heart disease, certain debilitating diseases (such as multiple sclerosis or rheumatoid arthritis), HIV infection, cancer, etc. All information concerning medical diagnosis is encoded according to the International Classification of Diseases, 10th revision (ICD-10). Finally, the SNIIRAM-PMSI databases also indicate medical procedures performed in the ambulatory setting, including information about the type and date of all laboratory tests performed, but not including their results.

The French healthcare databases have been previously described and used in epidemiological and pharmacoepidemiological studies [22,24–26].

### Study populations and study designs

Two study populations were defined; one for each objective.

To answer the first objective, a repeated cross-sectional study was performed to describe the trends in OAC use following the introduction of NOAC in AF patients. Patients with AF were identified in 2011 (as none of the NOACs was available for stroke prevention in France) and 2016 (the most recent data available at the time of writing the study protocol; dabigatran, rivaroxaban and apixaban were all reimbursed for stroke prevention in France, as apixaban was reimbursed from January 2014



1  
2  
3 onwards). OAC coverage was also calculated for year 2013 as this year represented the first calendar  
4 year for which the first two NOACs were available in France, i.e. a pivotal year for the  
5 pharmacological management of AF by oral anticoagulants. For each of these calendar years, a  
6 patient was considered to have AF when at least one diagnosis of AF (ICD-10 code I48) was identified  
7 from discharge and LTD diagnoses in the SNIIRAM-PMSI database in the calendar year considered or  
8 during the previous 5 years. Patients with no continuous '*Régime général*' health insurance coverage  
9 for at least six years before the calendar year considered were excluded.

10 To answer the second objective, a population-based cohort study was performed including patients  
11 with AF initiating OAC therapy in 2015-2016. First, OAC new users were identified among patients  
12 with continuous '*Régime général*' health insurance coverage as those with at least one  
13 reimbursement for OAC therapy in 2015-2016 and no reimbursement for any OAC (VKA or NOAC) in  
14 the previous 24 months. The patient's index date was the date of first OAC reimbursement identified  
15 during the 2015-2016 period. Second, the cohort of NOAC news users was restricted to those treated  
16 for AF: (i) patients treated for other OAC indications *i.e.* patients treated for deep vein  
17 thrombosis/pulmonary embolism (DVT/PE) or with lower limb orthopaedic procedures were  
18 excluded; (ii) OAC new users treated for AF were identified from the resulting cohort as the sum of  
19 "OAC new users with confirmed AF" for those with a diagnosis of AF (ICD-10 code I48) or specific AF  
20 management procedures identified from LTD or hospitalization discharge data during a six-year pre-  
21 index period, and "OAC new users with probable AF" for outpatients identified using an algorithm  
22 discriminating AF from DVT/PE with 95% specificity [27]. The remaining patients were not classified  
23 as probable FA patients and were excluded. Codes used for identification of AF and all of the patient  
24 characteristics considered, including comorbidities, are displayed in **Supplementary Table 1**.

#### 41 **Patient and public involvement**

42 Patients and or public were not involved.

#### 45 **Exposure**

46 NOAC (dabigatran, rivaroxaban, apixaban) and VKA therapies (fluindione, warfarin and  
47 acenocoumarol) were identified using ATC codes; edoxaban was not available in France during the  
48 period considered.

#### 52 **Outcomes**

53 Trends in oral anticoagulant therapy use in patients with AF

54 The proportion of AF patients treated by OAC therapy was assessed before and after approval of  
55 NOAC therapies for stroke prevention in France. Trends in the use of antiplatelet agents were also  
56 assessed in AF patients over the same timeframe.

### Patterns of use of NOAC therapy in new users with AF

The description of patterns of NOAC use in new users treated for AF in 2015-2016 included comparison of the baseline characteristics among NOAC new users and compared to those of VKA new users and potential inappropriate use of NOAC therapy was then investigated by identifying:

(i) NOAC off-label use or non-approved indication/dose: contraindications to NOAC therapy according to SmPCs [concomitant coagulopathy, purpura and other haemorrhagic conditions, liver fibrosis and cirrhosis, recent gastrointestinal ulceration or intracranial haemorrhage], valvular atrial fibrillation [NOAC are only approved for non-valvular AF], prosthetic heart valve [contraindicated for dabigatran], cancer [NOAC are not approved for prevention of thromboembolism in patients with cancer] and prescription of NOAC doses not approved for stroke prevention in Europe [dabigatran 75 mg and rivaroxaban 10 mg are not approved for stroke prevention in Europe and are therefore off-label doses in AF patients]; (ii) non-compliance with guidelines with respect to follow-up and clinical work-up of patients during the first year following NOAC initiation: no monitoring of patients' renal function [renal function should be assessed at initiation and annually during NOAC therapy [28]], discontinuation of NOAC therapy [OAC therapy is recommended as lifetime treatment in most patients with AF] (iii) clinically relevant drug-drug interactions at initiation increasing the bleeding risk at initiation; (iv) potential inappropriate underdosing, i.e. patients in whom the NOAC dose prescribed at initiation was inappropriately reduced in view of their individual stroke and bleeding risks.

### Data analysis

Descriptive analyses are expressed as mean and standard deviation (SD) for continuous variables, and numbers and percentages for categorical variables.

### Trends in oral anticoagulant therapy use in patients with AF

For each calendar year, the proportion of patients treated by a drug was defined by the number of patients with at least one reimbursement for this drug in the calendar year considered over the total number of patients identified as having AF in the same year. Proportions are reported according to the type of OAC first reimbursed in the year considered. Antiplatelet drugs and OAC therapies were considered to be coprescribed when they were reimbursed at least once on the same day during the calendar year studied. Analyses were replicated in subgroups of AF patients: (i) aged 75 years and over; (ii) female and male, separately; (iii) with a history of hospitalization for arterial thromboembolic events (ATE); (iv) with concomitant ischaemic heart disease (IHD) or prosthetic heart valve.

### *Patterns of use of NOAC therapy in new users with AF*

Baseline characteristics of NOAC new users with AF included sociodemographic data, including deprivation index of the patient's municipality of residence [29], type of initial prescriber, clinical scores predicting the risk of stroke (CHA<sub>2</sub>DS<sub>2</sub>-VASc score) or bleeding (HAS-BLED score) [30,31], adapted to claims data and the other main comorbidities and comedications, including proxies of frailty. A negative binomial regression analysis for each NOAC therapy and each baseline characteristic was performed to assess the association between these characteristics and the choice of NOAC therapy *versus* VKA therapy, while adjusting for age and sex.

Compliance with guidelines regarding renal function monitoring and treatment persistence patterns were assessed in new users for whom data for at least one year of follow-up were available, i.e. patients included in 2015 and who had not died and had not been hospitalized for 3 months or longer. Compliance with renal function monitoring was assessed at NOAC initiation (no reimbursement for renal function monitoring during the three months before and the three months after NOAC initiation) and during the first year following treatment initiation. OAC non-persistence patterns were assessed over the one-year period following the index date by calculating proxies of OAC discontinuation: number of patients with only one reimbursement and one-year crude discontinuation rates.

Drugs increasing the risk of bleeding were those responsible for clinically relevant pharmacodynamic interactions with OAC therapy, i.e. concomitant reimbursement of other parenteral and oral antithrombotic drugs, non-steroidal anti-inflammatory drugs (NSAIDs); selective serotonin reuptake inhibitors and selective serotonin-norepinephrine reuptake inhibitors (SSRIs and SSNRIs) [7,18,32]. Patients taking concomitant drugs with OAC therapy were defined as those with a reimbursement for the drug of interest during the period corresponding to the index date and the following 45 days. Analyses were replicated in VKA new users for descriptive purposes.

Finally, potential inappropriate underdosing with NOACs was defined as initiation of NOAC therapy in patients at risk of stroke in whom reduced doses of NOAC were prescribed with no identified justification. As this study was based on claims data and as, up until 2016, ESC guidelines recommended prescribing reduced-dose NOAC in patients with HAS-BLED $\geq$ 3 [8], the proportion of AF patients initiating reduced-dose NOAC with an HAS-BLED score $<$ 3 among all NOAC new users with a CHA<sub>2</sub>DS<sub>2</sub>-VASc score  $\geq$ 2 was used to quantify potential inappropriate underdosing in NOAC new users. Analyses were replicated in patients i) with CHA<sub>2</sub>DS<sub>2</sub>-VASc score  $\geq$ 4, ii) aged 75 and over with a history of ATE.

## Results

### Trends in oral anticoagulant therapy use in patients with AF

The number of patients identified from French healthcare databases as having AF increased between 2011 (N=853,440) and 2016 (N=1,098,657). A high proportion of these patients were identified exclusively by hospitalization discharge diagnosis and this proportion decreased only slightly over this time interval from 90.2% (N=770,002) to 86.2% (N=946,657).

Between 2011 and 2016, the proportion of patients with at least one reimbursement for OAC therapy among all AF patients moderately increased (+16%) from 56.7% to 65.8%, corresponding to a steady decrease in VKA use (from 56.6% to 40.8% of all AF patients) associated with the introduction of NOACs (from 0.6% to 27.7%). In 2016, among patients with identified AF, VKA therapy remained the preferred OAC therapy (62.0%), including in patients aged 75 years and over (67.0%) and in those with a history of ATE (63.5%).

Between 2011 and 2016, the use of antiplatelet therapy decreased in AF patients (-22%), but the proportion of patients with concomitant OAC and antiplatelet therapy remained stable (9.7% in 2016). In 2016, 32.5% of AF patients had at least one reimbursement for antiplatelet therapy during the year.

Similar trends were observed in the subgroup analyses. A slightly higher rate of OAC therapy was observed in patients with a history of ATE (68.4% vs 65.8% in the total cohort in 2016). However, OAC coverage was lower in women than in men with AF (64.7% vs 66.8% in 2016) (**Figure 1**).

### Patterns of use of NOAC therapy in new users with AF

#### *Baseline characteristics of OAC new users*

Among 540,914 patients initiating OAC therapy in 2015-2016, a total of 192,851 (35.7%) patients were included in the study population, corresponding to 127,841 NOAC new users and 65,010 VKA new users with AF. The main reasons for ineligibility were other indications or uncertain identification of the indication for NOAC (**Figure 2**).

The mean age of the NOAC new users cohort was 74.1±11.6 years; patients over the age of 80 represented 37.3% of the total cohort. One-half of the NOAC new users were women, and 40.0% received a reduced dose at initiation (62.2% for dabigatran new users). Apixaban was the NOAC most commonly initiated; apixaban new users were older and had more comorbidities than the other two groups of NOAC new users. NOAC therapy was more likely to be initiated than VKA therapy among patients aged 75 years and older (59.4%) and in patients with a history of ATE (57.8%) (**Table 1**).

Characteristics associated with bleeding risk, such as older age, renal impairment, history of bleeding or bleeding predisposition, and treatment with a concomitant drug increasing the risk of bleeding at

1  
2  
3 OAC initiation, were strong predictors of being treated with VKA therapy *versus* NOAC therapies  
4 **(Supplementary Table 2)**.

5  
6  
7 *Potential inappropriate use of NOAC therapy*

8 About 15% of NOAC new users with AF were considered to be using NOAC off-label or for a non-  
9 approved indication. In particular, 8.5% of NOAC new users with AF had valvular heart disease (8.5%),  
10 including prosthetic heart valve (1.5%) and 4.6% had a recently or currently treated cancer **(Table 2)**.

11 About 15% and 9% of NOAC new users had no reimbursement for renal function tests at initiation  
12 and during the one-year period post-initiation, respectively. Discontinuation during the one-year  
13 period following initiation was frequent, as more than 20% of patients had five or less  
14 reimbursements **(Table 2)**.

15 Nearly 30% of NOAC new users were using at least one concomitant drug increasing the risk of  
16 bleeding (52% in VKA new users). The most common concomitant drugs concerned at initiation were  
17 antiplatelet agents or parenteral anticoagulants **(Table 2)**.

18 Among the 116,391 NOAC new users with AF with a CHA<sub>2</sub>DS<sub>2</sub>-VASc score  $\geq 2$ , 29.1% (N=33,845) were  
19 prescribed a reduced dose although they had an HAS-BLED score  $< 3$ . This meant that nearly 1 in 3  
20 NOAC new users with AF and at risk of stroke were therefore potentially prescribed an  
21 inappropriately reduced dose of NOAC at initiation. This proportion was 33% (N=24,281) and 14.5%  
22 when defining patients at risk of stroke as patients with a CHA<sub>2</sub>DS<sub>2</sub>-VASc score  $\geq 4$  and aged 75 and  
23 over with a history of ATE, respectively **(Figure 3)**.

24 Differences in baseline characteristics were observed in patients with HAS-BLED $< 3$  according to the  
25 type of NOAC dose prescribed, e.g. patients with reduced-dose NOAC were older and frailer than  
26 those with standard-dose NOAC **(Supplementary Table 3)**.

## Discussion

### Main findings

OAC therapy use among patients with AF improved in France between 2011 and 2016, but remained suboptimal with about 66% of the 1.1 million patients with identified AF treated by OAC therapy in 2016. Use of antiplatelet therapy in AF patients decreased over the same period, but still concerned 33% of all AF patients in 2016. Patients with AF were more likely to be treated by VKA than NOAC therapy, including older patients and those at higher risk of stroke.

Nearly 193,000 patients with AF were identified as OAC new users in 2015-2016: patients were more likely to be treated by NOAC than VKA therapy, including older patients and those at higher risk of stroke. Results on current patterns of use of NOAC therapy in new users with AF suggest several situations of inappropriate use, including frequent concomitant use of drugs increasing the risk of bleeding and potential inappropriate underdosing.

### Comparison with postmarketing literature and clinical implications

The overall improvement of management of AF patients observed with regards to OAC therapy after the introduction of NOACs has been reported in many countries [33–36]. The same applies to the steady decrease in VKA use in favour of NOAC therapies [12,37,38], and the gaps remaining in optimal OAC coverage and high antiplatelet drug use [39–41].

This study demonstrated channelling of NOAC therapy towards patients at lower risk of stroke and bleeding when considering all patients with AF, in line with what has become a common feature reported worldwide in clinical practice by many observational studies on the current patterns of use of NOACs [15,42–45]. In particular, data from EORP-AF registry showed that younger age and non-valvular heart diseases were also found to be clinical predictors for being treated with NOAC in other South countries (Greece, Italy, Portugal) [46].

However, NOAC therapy is now the preferred OAC therapy at initiation in the oldest patients and those at higher risk of stroke. This French pattern of OAC use has never been previously reported and contrasts with published results concerning earlier periods [47]. This emerging pattern is encouraging for AF management, as older and high-risk patients are those who should derive most benefit from NOAC *versus* VKA therapy [48].

Reduced doses were often prescribed in OAC new users, including dabigatran 75mg and rivaroxaban 10mg, which are not approved for stroke prevention in Europe [49]. In addition to the overall channelling mentioned above, these findings may reflect a “bleeding avoidance” strategy of prescribers (i.e. overestimation of the potential bleeding risk *versus* the likely benefit of stroke reduction) and the differential perception of the comparative safety of NOACs *versus* VKA and

1  
2  
3 between NOACs. The early safety alert on bleeding in dabigatran-treated patients, followed by the  
4 contraindication of this NOAC in patients with prosthetic heart valves, may have reinforced the fears  
5 of prescribers in relation to the safety of dabigatran, which would explain the difference in reduced-  
6 dose prescription rates between the three NOACs in this study, despite the intermediate stroke and  
7 bleeding risk profile of dabigatran compared to that of rivaroxaban and apixaban in new users.  
8 Similarly, among NOAC new users, apixaban was prescribed to the oldest and most severe patients.  
9 Apixaban was the only NOAC found to be superior to warfarin for all types of bleeding outcome and  
10 all-cause mortality, which would also illustrate the tendency of physicians to prescribe OAC therapies  
11 according to bleeding risk [5]. This may also explain the potential inappropriate underdosing  
12 observed in NOAC users in this study. This pattern of NOAC use has been previously reported, but  
13 mostly in field and registry studies based on small sample sizes. The reported inappropriate  
14 underdosing rate varies according to studies and the definition used. NOAC underdosing concerned  
15 30.4% of Turkish patients in the RAMSES study (N=2,086) [50], 18.4% of Japanese patients of the *KiCS*  
16 AF registry (N=1,284) [51,52], between 19.7% and 27.6% of patients in the SAKURA AF registry (N=  
17 3,266) [53], and 9.4% to 16% of patients in the ORBIT-AF II registry (N=7925) [21,54]. In the subgroup  
18 of Dutch patients (N=899) enrolled in the XANTUS registry, 33% of patients were also treated with  
19 reduced-dose rivaroxaban despite presenting normal renal function [55]. Using a large U.S.  
20 administrative database, Yao *et al* found that 13.3% of the 13,392 NOAC new users with no renal  
21 indication for dose reduction were potentially underdosed [56]. Taken together with our results,  
22 these data suggest that inappropriate underdosing might be a common issue in NOAC new users that  
23 should be systematically assessed when studying NOAC patterns of use. This is of particular concern,  
24 as recent data have suggested a relationship between NOAC dose and clinical outcomes [57]. In  
25 particular, NOAC underdosing has been shown to be associated with increased risk for adverse  
26 outcomes [21,56].

27  
28 These patterns of NOAC use contrast with the other patterns concomitantly observed in this study,  
29 such as the high level of concomitant prescription of antiplatelet agents and parenteral  
30 anticoagulants or, to a lesser extent, NOAC use in non-approved indications such as prosthetic heart  
31 valves that are both associated with an increased risk of bleeding [58–60].

### 32 **Strengths and limitations**

33 This study is the first to report the improved trend in OAC coverage in French patients with AF over  
34 the last five years as well as the recent patterns of use of OAC therapy in new users, particularly  
35 including a nationwide assessment of the growing issue of NOAC underdosing, based on health data  
36 for more than 50 million beneficiaries. Moreover, all OAC prescriptions filled in the ambulatory  
37 setting are captured in the databases and are reimbursed with no restriction of coverage: selection  
38  
39  
40  
41  
42  
43  
44  
45  
46  
47  
48  
49  
50  
51  
52  
53  
54  
55  
56  
57  
58  
59  
60

1  
2  
3 bias related to the access of patients to more expensive NOAC therapy is therefore not an issue with  
4 the use of French healthcare databases [22,61].

5  
6 However, several limitations related to the nature of the data used should be underlined. First of all,  
7 it cannot be verified whether patients actually took the drugs for which they were reimbursed.  
8  
9 Secondly, as the indication for treatment is not available in the databases, and despite the use of an  
10 algorithm to identify AF among outpatients in the French healthcare databases, identification of AF  
11 was mostly based on non-validated discharge and LTD diagnoses recorded in the databases.  
12  
13 Moreover, it cannot be excluded that the increase in the identified number of patients with AF over  
14 the 2011-2016 period could be partially explained by changes in LTD legislation in 2011 (e.g.  
15 hypertension was removed from the list of LTD, while access to LTD was facilitated for patients with  
16 severe arrhythmia and valvular heart diseases) which could have helped identify patients with AF.  
17  
18 Thirdly, identification of inappropriate underdosing at NOAC initiation was also indirectly assessed by  
19 using stroke and bleeding risk scores computed from claims data. Important medical data such as  
20 patient's weight, glomerular filtration rate and exact alcohol consumption are not available in the  
21 French healthcare databases, which may have led to underestimation of the HAS-BLED score and  
22 therefore to overestimation of the proportion of patients potentially underdosed at initiation. These  
23 missing clinical data may also explain the prescription of reduced dose NOAC at treatment initiation  
24 in clinical practice. Furthermore, the agreement between these empirical scores in patients with AF  
25 and the prescriber-assessed stroke and bleeding risk is a subject of discussion [62]. Consequently, the  
26 rate of inappropriate underdosing should be interpreted with caution and must be confirmed by  
27 further studies. However, NOAC misuse and underdosing have also been reported in a French  
28 prospective field study based on patients' medical charts [63]. Of note, as INR values were not  
29 available in the databases, underdosing with VKA therapy was not assessed in this study, but has  
30 been frequently reported and must not be overlooked [53,64]. In addition, the results for NOAC and  
31 VKA new users are difficult to compare, as they were not adjusted for significant differences in  
32 baseline characteristics and this comparison was not the purpose of this study.  
33  
34  
35  
36  
37  
38  
39  
40  
41  
42  
43  
44  
45  
46  
47  
48  
49

## 50 **Conclusion**

51 OAC therapy use has modestly increased after the introduction of the NOACs for stroke prevention in  
52 patients with AF in France and NOAC therapy is now the preferred OAC therapy at initiation in older  
53 patients at higher risk of stroke. However, results from this nationwide drug utilization study suggest  
54 the need for improvement in appropriate prescription of OAC therapy in these patients, especially  
55 regarding the use of concomitant interacting drugs and the choice of initial NOAC dose.  
56  
57  
58  
59  
60



### **Contributor ship statement**

GM, AP, CB and AN designed the study. All authors have contributed substantially to the interpretation of results. In addition: GM, AP and AN drafted the article; CB, JD and AN conducted the statistical analysis; GM, AP, AN, CB, JD, AW provided critical revision of the manuscript for important intellectual content. All authors had full access to all of the data (including statistical reports and tables) in the study and can take responsibility for the integrity of the data and the accuracy of the data analysis. All authors approved the version to be published.

### **Competing interests**

All authors have no conflict of interest.

### **Funding**

The authors received no funding.

### **Data sharing statement**

No additional data are available directly from the authors. Permanent access to the French healthcare databases is automatically granted to certain government agencies, public institutions and public service authorities. Temporary access for studies and research is possible upon request from the national health data institute (INDS). All databases used in this study only contained anonymous patient records.

### **Ethics approval**

This observational study based on the French healthcare databases was approved by the French Data Protection Agency (*Commission Nationale de l'Informatique et des Libertés*, Cnil) and did not require patient consents or ethics committee approval.

### **Acknowledgments**

The authors thank Dr Saul, medical translator, for assistance in writing the manuscript.

## References

- 1 Steinberg BA, Piccini JP. Anticoagulation in atrial fibrillation. *BMJ* 2014;**348**:g2116–g2116. doi:10.1136/bmj.g2116
- 2 Verheugt FWA, Granger CB. Oral anticoagulants for stroke prevention in atrial fibrillation: current status, special situations, and unmet needs. *The Lancet* 2015;**386**:303–10. doi:10.1016/S0140-6736(15)60245-8
- 3 Connolly SJ, Ezekowitz MD, Yusuf S, *et al.* Dabigatran versus Warfarin in Patients with Atrial Fibrillation. *N Engl J Med* 2009;**361**:1139–51. doi:10.1056/NEJMoa0905561
- 4 Patel MR, Mahaffey KW, Garg J, *et al.* Rivaroxaban versus Warfarin in Nonvalvular Atrial Fibrillation. *N Engl J Med* 2011;**365**:883–91. doi:10.1056/NEJMoa1009638
- 5 Granger CB, Alexander JH, McMurray JJV, *et al.* Apixaban versus Warfarin in Patients with Atrial Fibrillation. *N Engl J Med* 2011;**365**:981–92. doi:10.1056/NEJMoa1107039
- 6 Giugliano RP, Ruff CT, Braunwald E, *et al.* Edoxaban versus Warfarin in Patients with Atrial Fibrillation. *N Engl J Med* 2013;**369**:2093–104. doi:10.1056/NEJMoa1310907
- 7 Kirchhof P, Benussi S, Kotecha D, *et al.* 2016 ESC Guidelines for the management of atrial fibrillation developed in collaboration with EACTS. *Eur Heart J* 2016;**37**:2893–962. doi:10.1093/eurheartj/ehw210
- 8 Authors/Task Force Members, Camm AJ, Lip GYH, *et al.* 2012 focused update of the ESC Guidelines for the management of atrial fibrillation: An update of the 2010 ESC Guidelines for the management of atrial fibrillation \* Developed with the special contribution of the European Heart Rhythm Association. *Eur Heart J* 2012;**33**:2719–47. doi:10.1093/eurheartj/ehs253
- 9 Desai NR, Krumme AA, Schneeweiss S, *et al.* Patterns of Initiation of Oral Anticoagulants in Patients with Atrial Fibrillation— Quality and Cost Implications. *Am J Med* 2014;**127**:1075-1082.e1. doi:10.1016/j.amjmed.2014.05.013
- 10 Barnes GD, Lucas E, Alexander GC, *et al.* National Trends in Ambulatory Oral Anticoagulant Use. *Am J Med* 2015;**128**:1300-1305.e2. doi:10.1016/j.amjmed.2015.05.044
- 11 Haastrup S, Hellfritzs M, Rasmussen L, *et al.* Use of Non-Vitamin K Antagonist Oral Anticoagulants 2008-2016: A Danish Nationwide Cohort Study. *Basic Clin Pharmacol Toxicol* Published Online First: 17 April 2018. doi:10.1111/bcpt.13024
- 12 Kjerpeseth LJ, Ellekjær H, Selmer R, *et al.* Trends in use of warfarin and direct oral anticoagulants in atrial fibrillation in Norway, 2010 to 2015. *Eur J Clin Pharmacol* Published Online First: 22 July 2017. doi:10.1007/s00228-017-2296-1
- 13 Staerk L, Fosbøl EL, Gadsbøll K, *et al.* Non-vitamin K antagonist oral anticoagulation usage according to age among patients with atrial fibrillation: Temporal trends 2011–2015 in Denmark. *Sci Rep* 2016;**6**. doi:10.1038/srep31477
- 14 Huiart L, Ferdynus C, Renoux C, *et al.* Trends in initiation of direct oral anticoagulant therapies for atrial fibrillation in a national population-based cross-sectional study in the French health insurance databases. *BMJ Open* 2018;**8**:e018180. doi:10.1136/bmjopen-2017-018180

- 1  
2  
3 15 Urbaniak AM, Strøm BO, Krøntveit R, *et al.* Prescription Patterns of Non-Vitamin K Oral  
4 Anticoagulants Across Indications and Factors Associated with Their Increased Prescribing in  
5 Atrial Fibrillation Between 2012–2015: A Study from the Norwegian Prescription Database. *Drugs*  
6 *Aging* 2017;**34**:635–45. doi:10.1007/s40266-017-0476-4  
7  
8  
9 16 Broderick JP, Bonomo JB, Kissela BM, *et al.* Withdrawal of Antithrombotic Agents and Its Impact  
10 on Ischemic Stroke Occurrence. *Stroke* 2011;**42**:2509–14. doi:10.1161/STROKEAHA.110.611905  
11  
12 17 Fang MC, Go AS, Chang Y, *et al.* Warfarin Discontinuation After Starting Warfarin for Atrial  
13 Fibrillation. *Circ Cardiovasc Qual Outcomes* 2010;**3**:624–31.  
14 doi:10.1161/CIRCOUTCOMES.110.937680  
15  
16 18 Heidbuchel H, Verhamme P, Alings M, *et al.* Updated European Heart Rhythm Association  
17 practical guide on the use of non-vitamin-K antagonist anticoagulants in patients with non-  
18 valvular atrial fibrillation: Executive summary. *Eur Heart J* 2016;:ehw058.  
19 doi:10.1093/eurheartj/ehw058  
20  
21 19 Dillinger J-G, Aleil B, Cheggour S, *et al.* Dosing issues with non-vitamin K antagonist oral  
22 anticoagulants for the treatment of non-valvular atrial fibrillation: Why we should not underdose  
23 our patients. *Arch Cardiovasc Dis* 2018;**111**:85–94. doi:10.1016/j.acvd.2017.04.008  
24  
25 20 Marzec LN, Wang J, Shah ND, *et al.* Influence of Direct Oral Anticoagulants on Rates of Oral  
26 Anticoagulation for Atrial Fibrillation. *J Am Coll Cardiol* 2017;**69**:2475–84.  
27 doi:10.1016/j.jacc.2017.03.540  
28  
29 21 Steinberg BA, Shrader P, Thomas L, *et al.* Off-Label Dosing of Non-Vitamin K Antagonist Oral  
30 Anticoagulants and Adverse Outcomes. *J Am Coll Cardiol* 2016;**68**:2597–604.  
31 doi:10.1016/j.jacc.2016.09.966  
32  
33 22 Tuppin P, Rudant J, Constantinou P, *et al.* Value of a national administrative database to guide  
34 public decisions: From the système national d'information interrégimes de l'Assurance Maladie  
35 (SNIIRAM) to the système national des données de santé (SNDS) in France. *Rev Épidémiol Santé*  
36 *Publique* 2017;**65**:S149–67. doi:10.1016/j.respe.2017.05.004  
37  
38 23 Bezin J, Duong M, Lassalle R, *et al.* The national healthcare system claims databases in France,  
39 SNIIRAM and EGB: Powerful tools for pharmacoepidemiology. *Pharmacoepidemiol Drug Saf* 2017  
40 Aug;26(8):954–962. doi:10.1002/pds.4233  
41  
42 24 Maura G, Blotière P-O, Bouillon K, *et al.* Comparison of the Short-Term Risk of Bleeding and  
43 Arterial Thromboembolic Events in Nonvalvular Atrial Fibrillation Patients Newly Treated With  
44 Dabigatran or Rivaroxaban Versus Vitamin K Antagonists: A French Nationwide Propensity-  
45 Matched Cohort Study. *Circulation* 2015;**132**:1252–60.  
46 doi:10.1161/CIRCULATIONAHA.115.015710  
47  
48 25 Weill A, Dalichampt M, Raguideau F, *et al.* Low dose oestrogen combined oral contraception and  
49 risk of pulmonary embolism, stroke, and myocardial infarction in five million French women:  
50 cohort study. *BMJ* 2016;**353**:i2002.  
51  
52 26 Neumann A, Maura G, Weill A, *et al.* Clinical Events After Discontinuation of  $\beta$ -Blockers in  
53 Patients Without Heart Failure Optimally Treated After Acute Myocardial Infarction: A Cohort  
54 Study on the French Healthcare Databases. *Circ Cardiovasc Qual Outcomes* 2018;**11**:e004356.  
55 doi:10.1161/CIRCOUTCOMES.117.004356  
56  
57  
58  
59  
60

- 1  
2  
3 27 Billionnet C, Alla F, Bérigaud É, *et al.* Identifying atrial fibrillation in outpatients initiating oral  
4 anticoagulants based on medico-administrative data: results from the French national healthcare  
5 databases. *Pharmacoepidemiol Drug Saf* 2017;**26**:535–43. doi:10.1002/pds.4192  
6  
7 28 Haute autorité de santé. Guide parcours de soins Fibrillation atriale. 2014. [https://www.has-](https://www.has-sante.fr/portail/jcms/c_1741768/fr/guide-parcours-de-soins-fibrillation-atriale)  
8 [sante.fr/portail/jcms/c\\_1741768/fr/guide-parcours-de-soins-fibrillation-atriale](https://www.has-sante.fr/portail/jcms/c_1741768/fr/guide-parcours-de-soins-fibrillation-atriale) (accessed 18 Jul  
9 2018).  
10  
11 29 Rey G, Jouglu E, Fouillet A, *et al.* Ecological association between a deprivation index and  
12 mortality in France over the period 1997 – 2001: variations with spatial scale, degree of  
13 urbanicity, age, gender and cause of death. *BMC Public Health* 2009;**9**:33. doi:10.1186/1471-  
14 2458-9-33  
15  
16 30 Olesen JB, Lip GYH, Hansen ML, *et al.* Validation of risk stratification schemes for predicting  
17 stroke and thromboembolism in patients with atrial fibrillation: nationwide cohort study. *BMJ*  
18 2011;**342**:d124–d124. doi:10.1136/bmj.d124  
19  
20 31 Pisters R, Lane DA, Nieuwlaet R, *et al.* A novel user-friendly score (HAS-BLED) to assess 1-year risk  
21 of major bleeding in patients with atrial fibrillation: the Euro Heart Survey. *Chest* 2010;**138**:1093–  
22 100. doi:10.1378/chest.10-0134  
23  
24 32 Renoux C, Vahey S, Dell’Aniello S, *et al.* Association of Selective Serotonin Reuptake Inhibitors  
25 With the Risk for Spontaneous Intracranial Hemorrhage. *JAMA Neurol* 2017;**74**:173.  
26 doi:10.1001/jamaneurol.2016.4529  
27  
28 33 Cowan JC, Wu J, Hall M, *et al.* A 10 year study of hospitalized atrial fibrillation-related stroke in  
29 England and its association with uptake of oral anticoagulation. *Eur Heart J* Published Online  
30 First: 5 July 2018. doi:10.1093/eurheartj/ehy411  
31  
32 34 Steinberg BA, Gao H, Shrader P, *et al.* International trends in clinical characteristics and oral  
33 anticoagulation treatment for patients with atrial fibrillation: Results from the GARFIELD-AF,  
34 ORBIT-AF I, and ORBIT-AF II registries. *Am Heart J* 2017;**194**:132–40.  
35 doi:10.1016/j.ahj.2017.08.011  
36  
37 35 Brown JD, Shewale AR, Dherange P, *et al.* A Comparison of Oral Anticoagulant Use for Atrial  
38 Fibrillation in the Pre- and Post-DOAC Eras. *Drugs Aging* 2016;**33**:427–36. doi:10.1007/s40266-  
39 016-0369-y  
40  
41 36 Apenteng PN, Gao H, Hobbs FR, *et al.* Temporal trends in antithrombotic treatment of real-world  
42 UK patients with newly diagnosed atrial fibrillation: findings from the GARFIELD-AF registry. *BMJ*  
43 *Open* 2018;**8**:e018905. doi:10.1136/bmjopen-2017-018905  
44  
45 37 Alalwan AA, Voils SA, Hartzema AG. Trends in utilization of warfarin and direct oral  
46 anticoagulants in older adult patients with atrial fibrillation. *Am J Health Syst Pharm*  
47 2017;**74**:1237–44. doi:10.2146/ajhp160756  
48  
49 38 Olesen JB, Sorensen R, Hansen ML, *et al.* Non-vitamin K antagonist oral anticoagulation agents in  
50 anticoagulant naive atrial fibrillation patients: Danish nationwide descriptive data 2011-2013.  
51 *Europace* 2015;**17**:187–93. doi:10.1093/europace/euu225  
52  
53 39 Lacoïn L, Lumley M, Ridha E, *et al.* Evolving landscape of stroke prevention in atrial fibrillation  
54 within the UK between 2012 and 2016: a cross-sectional analysis study using CPRD. *BMJ Open*  
55 2017;**7**:e015363. doi:10.1136/bmjopen-2016-015363  
56  
57  
58  
59  
60

- 1  
2  
3 40 Averlant L, Ficheur G, Ferret L, *et al.* Underuse of Oral Anticoagulants and Inappropriate  
4 Prescription of Antiplatelet Therapy in Older Inpatients with Atrial Fibrillation. *Drugs Aging*  
5 2017;**34**:701–10. doi:10.1007/s40266-017-0477-3  
6  
7 41 Alamneh EA, Chalmers L, Bereznicki LR. Suboptimal Use of Oral Anticoagulants in Atrial  
8 Fibrillation: Has the Introduction of Direct Oral Anticoagulants Improved Prescribing Practices?  
9 *Am J Cardiovasc Drugs* 2016;**16**:183–200. doi:10.1007/s40256-016-0161-8  
10  
11 42 Douros A, Renoux C, Coulombe J, *et al.* Patterns of long-term use of non-vitamin K antagonist  
12 oral anticoagulants for non-valvular atrial fibrillation: Quebec observational study.  
13 *Pharmacoepidemiol Drug Saf* 2017;**26**:1546–54. doi:10.1002/pds.4333  
14  
15 43 Komen J, Forslund T, Hjemdahl P, *et al.* Factors associated with antithrombotic treatment  
16 decisions for stroke prevention in atrial fibrillation in the Stockholm region after the introduction  
17 of NOACs. *Eur J Clin Pharmacol* 2017;**73**:1315–22. doi:10.1007/s00228-017-2289-0  
18  
19 44 Patel PA, Zhao X, Fonarow GC, *et al.* Novel Oral Anticoagulant Use Among Patients With Atrial  
20 Fibrillation Hospitalized With Ischemic Stroke or Transient Ischemic Attack. *Circ Cardiovasc Qual*  
21 *Outcomes* 2015;**8**:383–92. doi:10.1161/CIRCOUTCOMES.114.000907  
22  
23 45 Lauffenburger JC, Farley JF, Gehi AK, *et al.* Factors Driving Anticoagulant Selection in Patients  
24 With Atrial Fibrillation in the United States. *Am J Cardiol* 2015;**115**:1095–101.  
25 doi:10.1016/j.amjcard.2015.01.539  
26  
27 46 Lip GYH, Laroche C, Boriani G, *et al.* Regional differences in presentation and treatment of  
28 patients with atrial fibrillation in Europe: a report from the EURObservational Research  
29 Programme Atrial Fibrillation (EORP-AF) Pilot General Registry. *Eur Eur Pacing Arrhythm Card*  
30 *Electrophysiol J Work Groups Card Pacing Arrhythm Card Cell Electrophysiol Eur Soc Cardiol*  
31 2015;**17**:194–206. doi:10.1093/europace/euu201  
32  
33 47 Maura G, Billionnet C, Alla F, *et al.* Comparison of Treatment Persistence with Dabigatran or  
34 Rivaroxaban versus Vitamin K Antagonist Oral Anticoagulants in Atrial Fibrillation Patients: A  
35 Competing Risk Analysis in the French National Health Care Databases. *Pharmacother J Hum*  
36 *Pharmacol Drug Ther* 2018;**38**:6–18. doi:10.1002/phar.2046  
37  
38 48 Ruff CT, Giugliano RP, Braunwald E, *et al.* Comparison of the efficacy and safety of new oral  
39 anticoagulants with warfarin in patients with atrial fibrillation: a meta-analysis of randomised  
40 trials. *The Lancet* 2014;**383**:955–62. doi:10.1016/S0140-6736(13)62343-0  
41  
42 49 Sorensen HT, Riis AH, Lash TL, *et al.* Statin Use and Risk of Amyotrophic Lateral Sclerosis and  
43 Other Motor Neuron Disorders. *Circ Cardiovasc Qual Outcomes* 2010;**3**:413–7.  
44 doi:10.1161/CIRCOUTCOMES.110.936278  
45  
46 50 Başaran Ö, Dogan V, Beton O, *et al.* Suboptimal use of non-vitamin K antagonist oral  
47 anticoagulants: Results from the RAMSES study. *Medicine (Baltimore)* 2016;**95**:e4672.  
48 doi:10.1097/MD.0000000000004672  
49  
50 51 Ono T, Kohsaka S, Takatsuki S, *et al.* Inconsistent Dosing of Non-Vitamin K Oral Anticoagulants. *J*  
51 *Am Coll Cardiol* 2017;**70**:118. doi:10.1016/j.jacc.2017.03.609  
52  
53 52 Hsu JC, Akao M, Abe M, *et al.* International Collaborative Partnership for the Study of Atrial  
54 Fibrillation (INTERAF): Rationale, Design, and Initial Descriptives. *J Am Heart Assoc*  
55 2016;**5**:e004037. doi:10.1161/JAHA.116.004037  
56  
57  
58  
59  
60

- 1  
2  
3 53 Okumura Y, Yokoyama K, Matsumoto N, *et al.* Current use of direct oral anticoagulants for atrial  
4 fibrillation in Japan: Findings from the SAKURA AF Registry. *J Arrhythmia* 2017;**33**:289–96.  
5 doi:10.1016/j.joa.2016.11.003  
6
- 7 54 Steinberg BA, Shrader P, Pieper K, *et al.* Frequency and Outcomes of Reduced Dose Non–Vitamin  
8 K Antagonist Anticoagulants: Results From ORBIT-AF II (The Outcomes Registry for Better  
9 Informed Treatment of Atrial Fibrillation II). *J Am Heart Assoc* 2018;**7**:e007633.  
10 doi:10.1161/JAHA.117.007633  
11
- 12 55 Pisters R, van Vugt SPG, Brouwer MA, *et al.* Real-life use of Rivaroxaban in the Netherlands: data  
13 from the Xarelto for Prevention of Stroke in Patients with Atrial Fibrillation (XANTUS) registry.  
14 *Neth Heart J* 2017;**25**:551–8. doi:10.1007/s12471-017-1009-9  
15
- 16 56 Yao X, Shah ND, Sangaralingham LR, *et al.* Non–Vitamin K Antagonist Oral Anticoagulant Dosing  
17 in Patients With Atrial Fibrillation and Renal Dysfunction. *J Am Coll Cardiol* 2017;**69**:2779–90.  
18 doi:10.1016/j.jacc.2017.03.600  
19
- 20 57 Reilly PA, Lehr T, Haertter S, *et al.* The Effect of Dabigatran Plasma Concentrations and Patient  
21 Characteristics on the Frequency of Ischemic Stroke and Major Bleeding in Atrial Fibrillation  
22 Patients. *J Am Coll Cardiol* 2014;**63**:321–8. doi:10.1016/j.jacc.2013.07.104  
23
- 24 58 Bouillon K, Bertrand M, Boudali L, *et al.* Short-Term Risk of Bleeding During Heparin Bridging at  
25 Initiation of Vitamin K Antagonist Therapy in More Than 90 000 Patients With Nonvalvular Atrial  
26 Fibrillation Managed in Outpatient Care. *J Am Heart Assoc* 2016;**5**:e004065.  
27 doi:10.1161/JAHA.116.004065  
28
- 29 59 Chang S-H, Chou I-J, Yeh Y-H, *et al.* Association Between Use of Non–Vitamin K Oral  
30 Anticoagulants With and Without Concurrent Medications and Risk of Major Bleeding in  
31 Nonvalvular Atrial Fibrillation. *JAMA* 2017;**318**:1250. doi:10.1001/jama.2017.13883  
32
- 33 60 Van de Werf F, Brueckmann M, Connolly SJ, *et al.* A comparison of dabigatran etexilate with  
34 warfarin in patients with mechanical heart valves: The Randomized, phase II study to Evaluate  
35 the sAFety and pharmacokinetics of oral dabiGatran etexilate in patients after heart valve  
36 replacemeNt (RE-ALIGN). *Am Heart J* 2012;**163**:931-937.e1. doi:10.1016/j.ahj.2012.03.011  
37
- 38 61 Steffen M. Universalism, Responsiveness, Sustainability — Regulating the French Health Care  
39 System. *N Engl J Med* 2016;**374**:401–5. doi:10.1056/NEJMp1504547  
40
- 41 62 Steinberg BA, Kim S, Thomas L, *et al.* Lack of Concordance Between Empirical Scores and  
42 Physician Assessments of Stroke and Bleeding Risk in Atrial Fibrillation: Results From the  
43 Outcomes Registry for Better Informed Treatment of Atrial Fibrillation (ORBIT-AF) Registry.  
44 *Circulation* 2014;**129**:2005–12. doi:10.1161/CIRCULATIONAHA.114.008643  
45
- 46 63 Lafon T, Vallejo C, Hadj M, *et al.* Mésusage et iatrogénie des anticoagulants oraux directs (AOD) :  
47 étude observationnelle dans le service des urgences du CHU de Limoges. *Thérapie* 2018 May -  
48 Jun;**73**(3):209-215. doi: 10.1016/j.therap.2017.05.004.  
49
- 50 64 Pokorney SD, Simon DN, Thomas L, *et al.* Stability of International Normalized Ratios in Patients  
51 Taking Long-term Warfarin Therapy. *JAMA* 2016;**316**:661–3. doi:10.1001/jama.2016.9356  
52  
53  
54  
55  
56  
57  
58  
59  
60

## Figure titles and legends

**Figure 1.** Time trends in the use of oral antithrombotic therapy between 2011 and 2016 in patients with atrial fibrillation in France

Abbreviations: AF: atrial fibrillation; OAC: oral anticoagulant; VKA: vitamin K antagonist; NOAC: Non vitamin K antagonist oral anticoagulant

Legend: For Figures 1.b., 1.d and 1.e., estimates from all AF patients already presented in figure 1.a. are indicated by dashed lines for the purposes of comparison.

**Figure 2.** Patient flow chart.

Abbreviations: OAC: oral anticoagulant; NOAC: Non-vitamin K antagonist oral anticoagulant; VKA: vitamin K antagonist; DVT/PE: deep vein thrombosis/pulmonary embolism; AF: atrial fibrillation

**Figure 3.** Potential NOAC underdosing in new users with AF

Abbreviations: NOAC: Non-vitamin K antagonist oral anticoagulant; AF: atrial fibrillation

**Table 1. Baseline characteristics of anticoagulant-naive patients with atrial fibrillation initiating oral anticoagulants in 2015-2016**

| Characteristics (N; %*)                                            | NOAC                   |                          |                       |                          | VKA<br>N= 65,010 |
|--------------------------------------------------------------------|------------------------|--------------------------|-----------------------|--------------------------|------------------|
|                                                                    | Dabigatran<br>N= 9,085 | Rivaroxaban<br>N= 54,456 | Apixaban<br>N= 64,300 | Total NOAC<br>N= 127,841 |                  |
| <b>NOAC: reduced doses</b>                                         | 5,652 (62.2)           | 19,429 (35.7)            | 26,003 (40.4)         | 51,084 (40.0)            | NA               |
| <b>Female sex</b>                                                  | 4,546 (50.0)           | 26,147 (48.0)            | 33,375 (51.9)         | 64,068 (50.1)            | 33,865 (52.1)    |
| <b>Age (years), mean (SD)</b>                                      | 74.1 (11.6)            | 72.8 (11.9)              | 75.3 (11.3)           | 74.1 (11.6)              | 78.0 (11.3)      |
| 18-54                                                              | 548 (6.0)              | 4,007 (7.4)              | 3,172 (4.9)           | 7,727 (6.0)              | 2,361 (3.6)      |
| 55-64                                                              | 1,117 (12.3)           | 7,651 (14.0)             | 7,117 (11.1)          | 15,885 (12.4)            | 5,680 (8.7)      |
| 65-74                                                              | 2,514 (27.7)           | 16,057 (29.5)            | 16,645 (25.9)         | 35,216 (27.5)            | 12,969 (19.9)    |
| 75-79                                                              | 1,554 (17.1)           | 9,053 (16.6)             | 10,692 (16.6)         | 21,299 (16.7)            | 9,587 (14.7)     |
| ≥80                                                                | 3,352 (36.9)           | 17,688 (32.5)            | 26,674 (41.5)         | 47,714 (37.3)            | 34,413 (52.9)    |
| ≥90                                                                | 493 (5.4)              | 2,559 (4.7)              | 4,654 (7.2)           | 7,706 (6.0)              | 8,399 (12.9)     |
| <b>Deprivation index</b>                                           |                        |                          |                       |                          |                  |
| Quintile 1 (least deprived)                                        | 1,394 (15.3)           | 10,265 (18.9)            | 11,266 (17.5)         | 22,925 (17.9)            | 10,263 (15.8)    |
| Quintile 2                                                         | 1,586 (17.5)           | 10,678 (19.6)            | 12,496 (19.4)         | 24,760 (19.4)            | 11,884 (18.3)    |
| Quintile 3                                                         | 1,780 (19.6)           | 10,701 (19.7)            | 12,799 (19.9)         | 25,280 (19.8)            | 12,811 (19.7)    |
| Quintile 4                                                         | 1,917 (21.1)           | 10,794 (19.8)            | 13,142 (20.4)         | 25,853 (20.2)            | 14,272 (22.0)    |
| Quintile 5 (most deprived))                                        | 2,113 (23.3)           | 11,172 (20.5)            | 13,825 (21.5)         | 27,110 (21.2)            | 14,699 (22.6)    |
| Overseas departments                                               | 295 (3.2)              | 846 (1.6)                | 772 (1.2)             | 1,913 (1.5)              | 1,081 (1.7)      |
| <b>First prescriber's specialty</b>                                |                        |                          |                       |                          |                  |
| Hospital practitioner                                              | 3,720 (40.9)           | 22,905 (42.1)            | 29,316 (45.6)         | 55,941 (43.8)            | 39,083 (60.1)    |
| General practitioner                                               | 2,062 (22.7)           | 11,145 (20.5)            | 11,590 (18.0)         | 24,797 (19.4)            | 15,539 (23.9)    |
| Private cardiologist                                               | 3,093 (34.0)           | 18,978 (34.9)            | 21,843 (34.0)         | 43,914 (34.4)            | 8,511 (13.1)     |
| Private orthopaedic surgeon                                        | 16 (0.2)               | 100 (0.2)                | 95 (0.1)              | 211 (0.2)                | 73 (0.1)         |
| Other private specialist                                           | 168 (1.8)              | 1,149 (2.1)              | 1,276 (2.0)           | 2,593 (2.0)              | 1,583 (2.4)      |
| <b>CHA<sub>2</sub>DS<sub>2</sub>-VASc score<sup>†</sup></b>        |                        |                          |                       |                          |                  |
| Mean score (SD)                                                    | 3.7 (1.6)              | 3.5 (1.6)                | 3.9 (1.6)             | 3.7 (1.6)                | 4.5 (1.6)        |
| 0                                                                  | 183 (2.0)              | 1,294 (2.4)              | 847 (1.3)             | 2,324 (1.8)              | 309 (0.5)        |
| 1                                                                  | 635 (7.0)              | 4,854 (8.9)              | 3,637 (5.7)           | 9,126 (7.1)              | 1,607 (2.5)      |
| ≥ 2                                                                | 8,267 (91.0)           | 48,308 (88.7)            | 59,816 (93.0)         | 116,391 (90.1)           | 63,094 (97.0)    |
| C (Heart failure)                                                  | 2,849 (31.4)           | 17,805 (32.7)            | 23,548 (36.6)         | 44,202 (34.6)            | 32,727 (50.3)    |
| H (antihypertensive drugs)                                         | 7,547 (83.1)           | 44,260 (81.3)            | 54,596 (84.9)         | 106,403 (83.2)           | 59,139 (91.0)    |
| D(iabetes)                                                         | 1,959 (21.6)           | 11,279 (20.7)            | 14,087 (21.9)         | 27,325 (21.4)            | 18,806 (28.9)    |
| S(troke: ATE)                                                      | 1,207 (13.3)           | 4,930 (9.1)              | 8,448 (13.1)          | 14,585 (11.4)            | 10,638 (16.4)    |
| V(ascular diseases)                                                | 2,242 (24.7)           | 13,924 (25.6)            | 18,766 (29.2)         | 34,932 (27.3)            | 28,894 (44.4)    |
| <b>Age≥75 and arterial thromboembolic events<sup>†</sup></b>       | 769 (8.5)              | 3,126 (5.7)              | 5,608 (8.7)           | 9,503 (7.4)              | 7,762 (11.9)     |
| <b>Age&lt;65 and no arterial thromboembolic events<sup>†</sup></b> | 1,510 (16.6)           | 11,074 (20.3)            | 9,396 (14.6)          | 21,980 (17.2)            | 7,035 (10.8)     |



Table 1. (continued)

| Characteristics (N; %)                 | NOAC                   |                          |                       |                          | VKA<br>N= 65,010 |
|----------------------------------------|------------------------|--------------------------|-----------------------|--------------------------|------------------|
|                                        | Dabigatran<br>N= 9,085 | Rivaroxaban<br>N= 54,456 | Apixaban<br>N= 64,300 | Total NOAC<br>N= 127,841 |                  |
| <b>HAS-BLED score<sup>†</sup></b>      |                        |                          |                       |                          |                  |
| Mean score (SD)                        | 2.0 (0.9)              | 1.9 (0.9)                | 2.1 (0.9)             | 2.0 (0.9)                | 2.7 (1.0)        |
| ≥ 3                                    | 2,169 (23.9)           | 11,388 (20.9)            | 16,834 (26.2)         | 30,391 (23.8)            | 36,417 (56.0)    |
| <b>A(bnormal)</b>                      |                        |                          |                       |                          |                  |
| Renal function                         | 345 (3.8)              | 2,426 (4.5)              | 3,822 (5.9)           | 6,593 (5.2)              | 14,260 (21.9)    |
| Liver function                         | 169 (1.9)              | 967 (1.8)                | 1,106 (1.7)           | 2,242 (1.8)              | 2,372 (3.6)      |
| <b>B(leeding)</b>                      |                        |                          |                       |                          |                  |
| Predisposition                         | 182 (2.0)              | 1,161 (2.1)              | 1,605 (2.5)           | 2,948 (2.3)              | 5,873 (9.0)      |
| Major bleeding                         | 692 (7.6)              | 3,729 (6.8)              | 5,134 (8)             | 9,555 (7.5)              | 9,348 (14.4)     |
| <b>D(rug/alcohol)</b>                  |                        |                          |                       |                          |                  |
| Alcohol abuse <sup>‡</sup>             | 272 (3.0)              | 1,698 (3.1)              | 1,730 (2.7)           | 3,700 (2.9)              | 2,923 (4.5)      |
| <b>Drug-drug interactions</b>          |                        |                          |                       |                          |                  |
| Parenteral anticoagulant (heparin)     | 64 (0.7)               | 331 (0.6)                | 361 (0.6)             | 756 (0.6)                | 9,824 (15.1)     |
| Antiplatelet drugs                     | 826 (9.1)              | 5,225 (9.6)              | 6,951 (10.8)          | 13,002 (10.2)            | 15,433 (23.7)    |
| NSAIDs                                 | 72 (0.8)               | 365 (0.7)                | 344 (0.5)             | 781 (0.6)                | 212 (0.3)        |
| <b>Other comorbidities<sup>†</sup></b> |                        |                          |                       |                          |                  |
| Ischaemic heart disease                | 1,821 (20.0)           | 11,321 (20.8)            | 15,439 (24.0)         | 28,581 (22.4)            | 23,657 (36.4)    |
| Frailty (proxies)                      | 1,666 (18.3)           | 8,971 (16.5)             | 12,730 (19.8)         | 23,367 (18.3)            | 24,175 (37.2)    |
| Dementia or Parkinson's disease        | 524 (5.8)              | 3,204 (5.9)              | 4,125 (6.4)           | 7,853 (6.1)              | 7,437 (11.4)     |
| Psychiatric disorders                  | 1,722 (19.0)           | 10,593 (19.5)            | 12,844 (20.0)         | 25,159 (19.7)            | 16,598 (25.5)    |
| Smoking <sup>‡</sup>                   | 1,024 (11.3)           | 6,481 (11.9)             | 7,442 (11.6)          | 14,947 (11.7)            | 11,434 (17.6)    |
| <b>Comedications<sup>§</sup></b>       |                        |                          |                       |                          |                  |
| Antiarrhythmics or cardiac glycosides  | 5,996 (66.0)           | 35,761 (65.7)            | 41,031 (63.8)         | 82,788 (64.8)            | 35,600 (54.8)    |
| Lipid-lowering agents                  | 3,913 (43.1)           | 22,250 (40.9)            | 28,812 (44.8)         | 54,975 (43.0)            | 31,903 (49.1)    |
| Oral corticosteroids                   | 1,105 (12.2)           | 6,964 (12.8)             | 8,079 (12.6)          | 16,148 (12.6)            | 8,967 (13.8)     |
| Antiulcer agents                       | 4,295 (47.3)           | 24,842 (45.6)            | 31,469 (48.9)         | 60,606 (47.4)            | 39,842 (61.3)    |
| Polymedication (≥5 ATC classes)        | 3,750 (41.3)           | 21,725 (39.9)            | 28,196 (43.9)         | 53,671 (42.0)            | 45,153 (69.5)    |
| Polymedication (≥10 ATC classes)       | 738 (8.1)              | 4,653 (8.5)              | 6,246 (9.7)           | 11,637 (9.1)             | 14,947 (23.0)    |

NOAC: Non-vitamin K antagonist oral anticoagulant; VKA: vitamin K antagonist; SD: standard deviation; ATE: arterial thromboembolic events (ischaemic stroke, arterial systemic embolism or transient ischaemic attack); NSAIDs: non-steroidal anti-inflammatory drugs

\* Unless otherwise stated

† Comorbidities were defined using a rolling 1-year period following the initiation of OAC therapy

‡ Smoking or alcohol data: measured by using proxies such as reimbursements for specific therapy or hospitalizations related to smoking or alcohol consumption/diseases

§ Comorbidities were defined using a rolling 4-month period preceding the initiation of OAC therapy

**Table 2. Potential inappropriate use of NOAC therapy in oral anticoagulant-naïve patients with atrial fibrillation in 2015-2016**

| Characteristics (N; %)                                                             | NOAC                   |                          |                       |                          | VKA<br>N= 65,010     |
|------------------------------------------------------------------------------------|------------------------|--------------------------|-----------------------|--------------------------|----------------------|
|                                                                                    | Dabigatran<br>N= 9,085 | Rivaroxaban<br>N= 54,456 | Apixaban<br>N= 64,300 | Total NOAC<br>N= 127,841 |                      |
| <b>Contraindications or non-approved indication/dose</b>                           | <b>1,457 (16.0)</b>    | <b>8,614 (15.8)</b>      | <b>9,542 (14.8)</b>   | <b>19,613 (15.3)</b>     | <b>NA</b>            |
| Any valvular heart disease                                                         | 649 (7.1)              | 4,146 (7.6)              | 6,122 (9.5)           | 10,917 (8.5)             | 16,461 (25.3)        |
| Prosthetic heart valve (mechanical or bioprosthetic valves)                        | 106 (1.2)              | 665 (1.2)                | 1,096 (1.7)           | 1,867 (1.5)              | 6,726 (10.3)         |
| Recently hospitalized for coagulopathy, purpura and other haemorrhagic conditions* | 90 (1.0)               | 479 (0.9)                | 596 (0.9)             | 1,165 (0.9)              | 2,142 (3.3)          |
| Liver fibrosis and cirrhosis*                                                      | 50 (0.6)               | 282 (0.5)                | 367 (0.6)             | 699 (0.5)                | 1,174 (1.8)          |
| Recent gastrointestinal ulceration or intracranial haemorrhage†                    | 40 (0.4)               | 120 (0.2)                | 248 (0.4)             | 408 (0.3)                | 350 (0.5)            |
| Recently or currently treated cancer*                                              | 417 (4.6)              | 2,531 (4.6)              | 2,898 (4.5)           | 5,846 (4.6)              | 4,252 (6.5)          |
| Reduced-dose NOAC not approved for stroke prevention in AF patients in Europe      | 357 (3.9)              | 1,844 (3.4)              | NA                    | 2,201 (3.5)              | NA                   |
| <b>Inappropriate use during follow-up‡</b>                                         |                        |                          |                       |                          |                      |
| No monitoring of renal function at initiation                                      | 637 (16.8)             | 3804 (15.5)              | 3642 (14.5)           | 8083 (15.1)              | 5401 (17.0)          |
| No monitoring of renal function in the year post-initiation                        | 378 (10.0)             | 2,347 (9.6)              | 2,138 (8.5)           | 4,863 (9.1)              | 2,984 (9.4)          |
| Non-persistence patterns, N (%)                                                    |                        |                          |                       |                          |                      |
| One reimbursement only                                                             | 605 (15.9)             | 2,666 (10.9)             | 1,771 (7.1)           | 5,042 (9.4)              | 2,426 (7.6)          |
| One-year treatment discontinuation rates§                                          | 984 (25.9)             | 6210 (25.4)              | 4524 (18.0)           | 11,718 (21.9)            | 8399 (26.4)          |
| <b>Concomitant use of drug increasing the risk of bleeding¶</b>                    | <b>2,639 (29.3)</b>    | <b>15,797 (29.3)</b>     | <b>18,556 (29.2)</b>  | <b>36,992 (29.3)</b>     | <b>33,025 (52.3)</b> |
| Antiplatelet agents or parenteral anticoagulants                                   | 1,728 (19.2)           | 10,386 (19.3)            | 12,382 (19.5)         | 24,496 (19.4)            | 28,112 (44.5)        |
| Parenteral anticoagulants                                                          | 287 (3.2)              | 1,577 (2.9)              | 1,520 (2.4)           | 3,384 (2.7)              | 12,078 (19.1)        |
| Antiplatelet agents                                                                | 1,490 (16.6)           | 9,179 (17.0)             | 11,170 (17.6)         | 21,839 (17.3)            | 19,710 (31.2)        |
| Aspirin                                                                            | 1,336 (14.8)           | 8,215 (15.2)             | 10,026 (15.8)         | 19,577 (15.5)            | 17,770 (28.1)        |
| NSAIDs                                                                             | 375 (4.2)              | 2,111 (3.9)              | 2,017 (3.2)           | 4,503 (3.6)              | 1,030 (1.6)          |
| SSRIs and SSNRIs                                                                   | 836 (9.3)              | 4,852 (9.0)              | 5,880 (9.2)           | 11,568 (9.1)             | 7,317 (11.6)         |

NOAC: Non-vitamin K antagonist oral anticoagulant; VKA: vitamin K antagonist; AF: atrial fibrillation; NA: not applicable; NSAIDs: non-steroidal anti-inflammatory drugs; SSRIs: selective serotonin reuptake inhibitors and SSNRIs: selective serotonin-norepinephrine reuptake inhibitors

\* Comorbidities identified using hospitalization and/or LTD data, and/or specific procedures during a rolling 1-year period preceding the initiation of OAC therapy

† Comorbidities identified using hospitalization data during a rolling 6-week period preceding the initiation of OAC therapy

‡ Data on patients with at least a one year of follow-up i.e. patients initiating OAC in 2015 after excluding patients who died and those hospitalized for 3 months or longer (N= 3,796; 24,483; 25,118; 53,397 and 31,777 for dabigatran-, rivaroxaban, apixaban, total NOAC- and total VKA new users, respectively); period considered (unless otherwise stated): rolling 1-year period following the initiation of OAC therapy (index date included)

§ One-year crude discontinuation rate for patients initiating OAC in 2015 who died and those hospitalized for 3 months or longer, defined as prolonged treatment discontinuation i.e. 90-day gap with no medication coverage after the 30-day coverage period of a refill

¶ Data for new users still alive after a 45-day period following the index date (N= 9,001; 53,885; 63,578; 126,464 and 63,180 for dabigatran-, rivaroxaban, apixaban, total NOAC- and total VKA new users , respectively); period considered: rolling 6-week period following the initiation of OAC therapy (index date included)

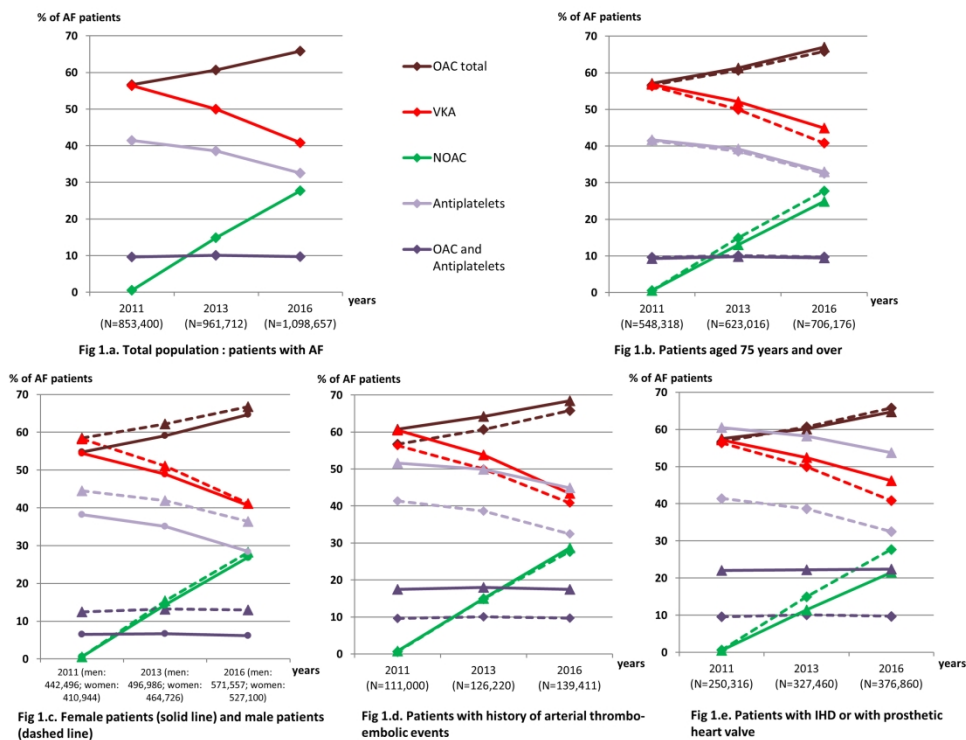

Figure 1

253x190mm (300 x 300 DPI)

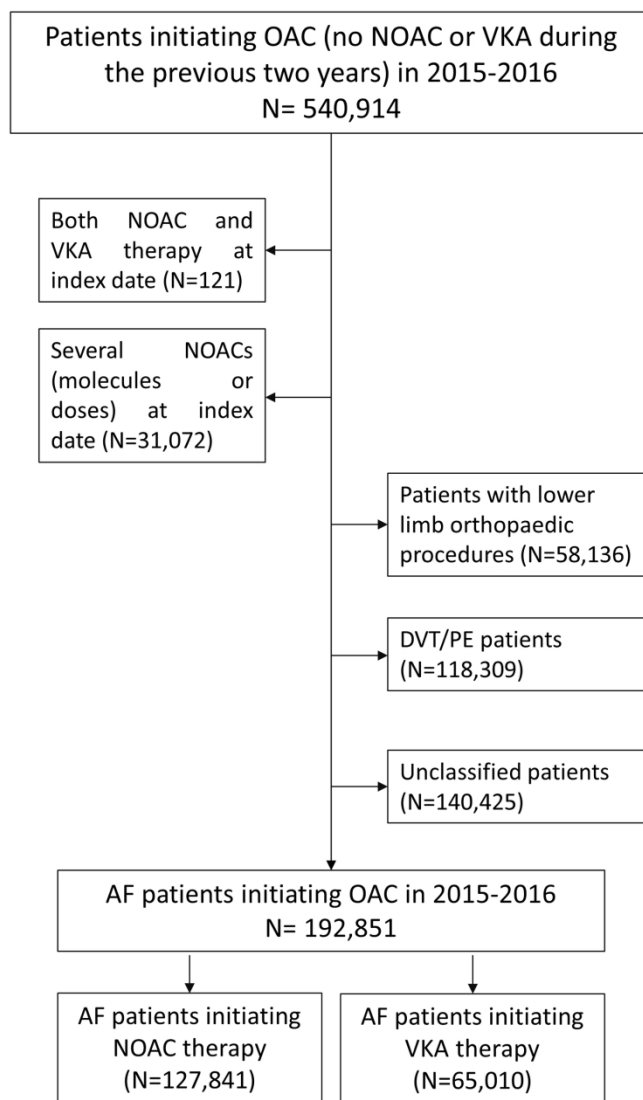

Figure 2

190x253mm (300 x 300 DPI)

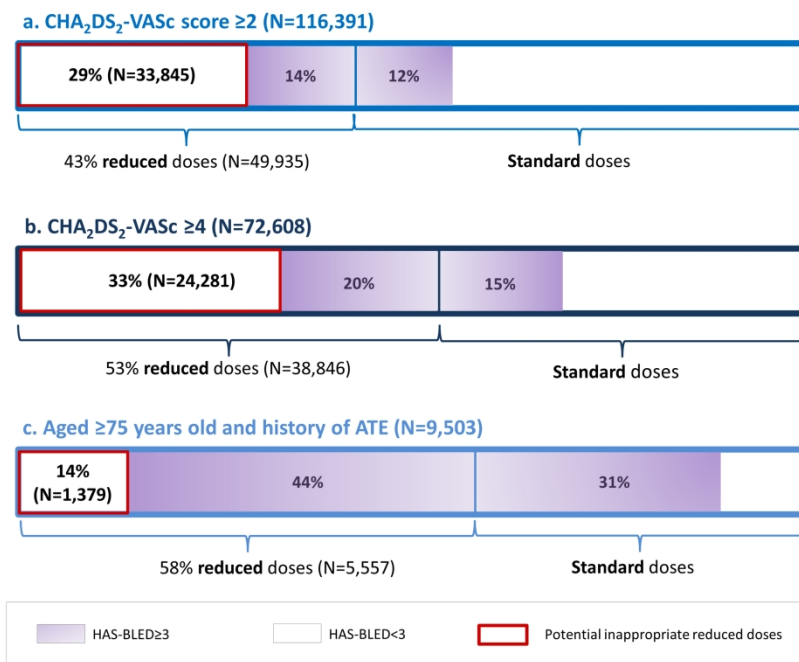

Figure 3

253x190mm (300 x 300 DPI)

## Supplementary Materials

Supplementary Table 1. Definitions used to identify comorbid conditions and comedications in the French healthcare databases.

Supplementary Table 2. Age- and sex-adjusted association between baseline characteristics and the choice of NOAC therapy compared to VKA therapy in OAC new users.

Supplementary Table 3. Comparison of selected baseline characteristics of DOAC new users with AF at risk of stroke according to level of HAS-BLED score and type of DOAC dose.

For peer review only

**Supplementary Table 1. Definitions used to identify comorbid conditions and comedications in the SNIIRAM-PMSI databases.**

| Covariates*                                                                               | Hospital discharge diagnoses†                                                                                                                               | LTD diagnoses†          | Specific procedures or drug reimbursements                                                                                                                                            |
|-------------------------------------------------------------------------------------------|-------------------------------------------------------------------------------------------------------------------------------------------------------------|-------------------------|---------------------------------------------------------------------------------------------------------------------------------------------------------------------------------------|
| <b>AF definition (Patterns of use of DOAC therapy in new users with AF)</b>               |                                                                                                                                                             |                         |                                                                                                                                                                                       |
| Nonvalvular atrial fibrillation                                                           | I48                                                                                                                                                         | I48                     | Radiofrequency ablation, cardioversion                                                                                                                                                |
| Lower limb orthopaedic procedures                                                         |                                                                                                                                                             |                         | Lower limb orthopaedic surgery or procedures                                                                                                                                          |
| History of valvular heart disease/Prosthetic heart valve                                  | I05-I09, I33-I39/ Z95.2, Z95.3 ou Z95.4                                                                                                                     |                         | Heart valve surgery                                                                                                                                                                   |
| Deep vein thrombosis/pulmonary embolism                                                   | I26, I80 (except I80.0), I81, I82                                                                                                                           | I26, I80-I82            | Lower limb venous ultrasonography, pulmonary/lower limb angiography, ventilation/perfusion scan                                                                                       |
| <b>CHA<sub>2</sub>DS<sub>2</sub>-VASc and HAS-BLED scores</b>                             |                                                                                                                                                             |                         |                                                                                                                                                                                       |
| Heart failure                                                                             | I50 or I11.0, I13.0, I13.2, I13.9, K76.1, J81 related to I50                                                                                                | I50                     | Specific medications approved for heart failure including beta-blockers (bisoprolol, carvedilol, metoprolol), eplerenone, bumetanide, furosemide when licensed for heart failure only |
| Antihypertensive drugs                                                                    |                                                                                                                                                             |                         | Diuretics, beta blockers, calcium channel blockers, agents acting on the renin-angiotensin system and other antiadrenergic agents                                                     |
| Diabetes                                                                                  | E10-E14                                                                                                                                                     | E10-E14                 | Insulins and blood glucose lowering drugs                                                                                                                                             |
| History of ATE (ischemic stroke, arterial systemic embolism or transient ischemic attack) | I63 (except I63.6), G46 related to I63 or I69.3; I74, G45 (except G45.4)                                                                                    | I63, I74, G45           |                                                                                                                                                                                       |
| Peripheral vascular disease                                                               | I20, I21, I22, I23, I24, I25, I70, I71, I72, I73, E10.5, E11.5, E12.5, E13.5, E14.5                                                                         | I70-I73, I20-I25        |                                                                                                                                                                                       |
| Abnormal renal function                                                                   | N18, I12.0, I13.1, I13.2, E10.2, E11.2, E13.2, E14.2, N08.3                                                                                                 | N18, I12                |                                                                                                                                                                                       |
| Abnormal liver function                                                                   | R18, I85, K70, K71.3, K71.4, K71.5, K71.7, K72.1, K73, K74, K76.1, B18, C22, C78.7                                                                          | K70, K73, K74, B18, C22 | Antiviral agents for systemic use HCV (ribavirin, [peg]interferon alpha and DAA), and against HCB ([peg]interferon alpha and NnRTIs).                                                 |
| Major bleeding                                                                            | I60-I62, S06.3-S06.6, I85, K25-K29, K62.5, K92, D62, N02, R31, R58, H11.3, H35.6, H43.1, H45.0, H92.2, J94.2, K66.1, M25.0, N92, N93.8, N93.9, N95.0, R04.0 |                         |                                                                                                                                                                                       |
| Predisposition for bleeding                                                               | Anemias : D50, D51, D52, D53, D55, D56, D57, D58, D59, D60, D62, D63, D64 or coagulation defects, purpura and other hemorrhagic: D65, D66, D67, D68, D69    |                         |                                                                                                                                                                                       |
| Alcohol abuse                                                                             | F10, K70, T51, K6, G31.2, G62.1, G72.1, I42.6, K29.2, Z71.4, Z72.1, Z50.2.                                                                                  |                         | disulfiram, acamprosate, nalmefene and products with naltrexone licensed in adult patients with alcohol dependence                                                                    |
| Drug-drug interaction                                                                     |                                                                                                                                                             |                         | Platelet aggregation inhibitors (including low-dose acetylsalicylic acid ), heparins, NSAIDs                                                                                          |
| <b>Other comorbidities</b>                                                                |                                                                                                                                                             |                         |                                                                                                                                                                                       |
| Ischemic heart disease (including myocardial infarction)                                  | I20-I25                                                                                                                                                     | I20-I25                 | Nitrovasodilator agents                                                                                                                                                               |
| Frailty                                                                                   | G81-G83                                                                                                                                                     | G81-G83                 | Home hospital bed, wheelchair, high level of nursing home stay                                                                                                                        |
| Dementia or Parkinson's disease                                                           | F00-F03, G30, G20                                                                                                                                           | F00-F03, G30, G20       | Anticholinesterases or NMDA receptor antagonists: anticholinergic and dopaminergic agents                                                                                             |
| Psychiatric disorders                                                                     | F20-29, F30-39                                                                                                                                              | F20-29, F30-39          | Antidepressants, antipsychotics, conventional mood stabilizers                                                                                                                        |
| Smoking                                                                                   | F17, Z71.6, Z72.0; J43-J44                                                                                                                                  | J43-J44                 | Nicotine replacement therapy                                                                                                                                                          |
| Recently hospitalized for coagulopathy, purpura and other haemorrhagic conditions         | D65-D69                                                                                                                                                     |                         |                                                                                                                                                                                       |
| Liver fibrosis and cirrhosis                                                              | K70.0, K70.2, K70.3, K70.4, K71.7, K72, K74                                                                                                                 |                         |                                                                                                                                                                                       |

1  
2  
3  
4  
5  
6  
7  
8  
9  
10  
11  
12  
13  
14  
15  
16  
17  
18  
19  
20  
21  
22  
23  
24  
25  
26  
27  
28  
29  
30  
31  
32  
33  
34  
35  
36  
37  
38  
39  
40  
41  
42  
43  
44  
45  
46

|                                                                |                                                               |                  |                                                                         |
|----------------------------------------------------------------|---------------------------------------------------------------|------------------|-------------------------------------------------------------------------|
| Recent gastrointestinal ulceration or intracranial haemorrhage | K25, K26, K27, K28, K29.0, I60, I61, I62, S06.4, S06.5, S06.6 |                  |                                                                         |
| Recently or currently treated cancer                           | C00-D09, D37-D48, Z510, Z511                                  | C00-D09, D37-D48 | Radiotherapy procedures                                                 |
| <b>Baseline comedications</b>                                  |                                                               |                  |                                                                         |
| Antiarrhythmics and cardiac glycosides                         |                                                               |                  | Antiarrhythmics: class I and III, verapamil, digitalis glycosides       |
| Lipid-lowering agents                                          |                                                               |                  | HMG CoA reductase inhibitors, fibrates, ezetimibe                       |
| Antiplatelet drugs                                             |                                                               |                  | Platelet aggregation inhibitors including low-dose acetylsalicylic acid |
| Oral corticosteroids                                           |                                                               |                  | Mineralo- and gluco-corticoids                                          |
| Antiulcer agents                                               |                                                               |                  | Mainly proton pump inhibitors and H2-receptor antagonists               |

LTD: long-term diseases; ATE: arterial thromboembolic events (mainly stroke); DVT/PE: deep vein thrombosis/pulmonary embolism; NMDA: N-methyl-D-aspartate; HIV: human immunodeficiency virus; PI: Protease inhibitor; NNRTIs: Non-nucleoside reverse transcriptase inhibitors; NnRTI: Nucleoside and nucleotide reverse transcriptase inhibitors; DAA: direct-acting antiviral; HMG CoA: 3-hydroxy-3-methyl-glutaryl-CoA; NSAIDs: Non-steroidal anti-inflammatory drugs.

\* Comorbidities were identified using ICD-10 diagnosis codes for hospital discharge/LTD, or specific procedures, or drug reimbursements. Concomitant medications were identified as those dispensed at least once during the 4-month period preceding the index date. Influenza vaccination was determined during the first 'flu vaccination campaign preceding the index date.

†ICD-10 codes



**Supplementary Table 2. Age- and sex-adjusted association between baseline characteristics and the choice of NOAC therapy compared to VKA therapy in OAC new users.**

| Baseline characteristics                             | Dabigatran vs VKA |        |      |          | Rivaroxaban vs VKA |        |      | Apixaban vs VKA |      |        |      |          |
|------------------------------------------------------|-------------------|--------|------|----------|--------------------|--------|------|-----------------|------|--------|------|----------|
|                                                      | RR*               | 95% CI |      | p-value† | RR*                | 95% CI |      | p-value†        | RR*  | 95% CI |      | p-value† |
| <b>Female sex</b>                                    | 1.11              | 1.05   | 1.17 | ***      | 1.03               | 1.00   | 1.07 | *               | 1.07 | 1.04   | 1.09 | ***      |
| <b>Age (years)</b>                                   |                   |        |      |          |                    |        |      |                 |      |        |      |          |
| 18-54 (Ref)                                          | 1.00              | 1.00   | 1.00 |          | 1.00               | 1.00   | 1.00 |                 | 1.00 | 1.00   | 1.00 |          |
| 55-64                                                | 0.87              | 0.78   | 0.98 | *        | 0.92               | 0.87   | 0.97 | **              | 0.97 | 0.92   | 1.02 |          |
| 65-74                                                | 0.86              | 0.77   | 0.95 | **       | 0.89               | 0.84   | 0.94 | ***             | 0.98 | 0.93   | 1.03 |          |
| 75-79                                                | 0.73              | 0.65   | 0.81 | ***      | 0.77               | 0.73   | 0.82 | ***             | 0.91 | 0.87   | 0.96 | ***      |
| 80-84                                                | 0.58              | 0.52   | 0.65 | ***      | 0.65               | 0.61   | 0.68 | ***             | 0.83 | 0.79   | 0.87 | ***      |
| 85-89                                                | 0.44              | 0.39   | 0.49 | ***      | 0.50               | 0.48   | 0.54 | ***             | 0.74 | 0.70   | 0.77 | ***      |
| >=90                                                 | 0.28              | 0.25   | 0.32 | ***      | 0.37               | 0.35   | 0.40 | ***             | 0.61 | 0.57   | 0.65 | ***      |
| <b>Deprivation index</b>                             |                   |        |      |          |                    |        |      |                 |      |        |      |          |
| quintile 1 (least deprived) (Ref)                    | 1.00              | 1.00   | 1.00 |          | 1.00               | 1.00   | 1.00 |                 | 1.00 | 1.00   | 1.00 |          |
| quintile 2                                           | 0.97              | 0.91   | 1.05 |          | 0.94               | 0.92   | 0.97 | ***             | 0.97 | 0.95   | 1.00 | *        |
| quintile 3                                           | 0.99              | 0.93   | 1.07 |          | 0.90               | 0.87   | 0.92 | ***             | 0.94 | 0.92   | 0.97 | ***      |
| quintile 4                                           | 0.96              | 0.89   | 1.03 |          | 0.85               | 0.83   | 0.87 | ***             | 0.90 | 0.88   | 0.93 | ***      |
| quintile 5 (most deprived)                           | 1.00              | 0.94   | 1.07 |          | 0.85               | 0.83   | 0.87 | ***             | 0.91 | 0.89   | 0.93 | ***      |
| Overseas departments                                 | 1.60              | 1.41   | 1.82 | ***      | 0.83               | 0.77   | 0.89 | ***             | 0.77 | 0.72   | 0.83 | ***      |
| <b>First prescriber's specialty</b>                  |                   |        |      |          |                    |        |      |                 |      |        |      |          |
| Hospital practitioner (Ref)                          | 1.00              | 1.00   | 1.00 |          | 1.00               | 1.00   | 1.00 |                 | 1.00 | 1.00   | 1.00 |          |
| General practitioner                                 | 1.37              | 1.29   | 1.46 | ***      | 1.16               | 1.10   | 1.23 | ***             | 1.00 | 0.96   | 1.04 |          |
| Private cardiologist                                 | 2.92              | 2.76   | 3.08 | ***      | 1.80               | 1.70   | 1.90 | ***             | 1.65 | 1.59   | 1.71 | ***      |
| Private orthopedic surgeon                           | 1.96              | 1.20   | 3.21 | **       | 1.48               | 1.20   | 1.81 | ***             | 1.32 | 1.07   | 1.61 | **       |
| Other private specialist                             | 1.07              | 0.93   | 1.24 |          | 1.12               | 1.04   | 1.21 | **              | 1.03 | 0.97   | 1.10 |          |
| <b>From CHA<sub>2</sub>DS<sub>2</sub>-VASc score</b> |                   |        |      |          |                    |        |      |                 |      |        |      |          |
| Heart Failure                                        | 0.52              | 0.49   | 0.54 | ***      | 0.70               | 0.68   | 0.71 | ***             | 0.77 | 0.75   | 0.78 | ***      |
| Antihypertensive drugs                               | 0.60              | 0.57   | 0.63 | ***      | 0.74               | 0.72   | 0.76 | ***             | 0.80 | 0.78   | 0.82 | ***      |
| Diabetes                                             | 0.67              | 0.63   | 0.71 | ***      | 0.76               | 0.74   | 0.77 | ***             | 0.80 | 0.79   | 0.82 | ***      |
| ATE                                                  | 0.85              | 0.79   | 0.92 | ***      | 0.71               | 0.68   | 0.74 | ***             | 0.90 | 0.88   | 0.92 | ***      |

1  
2  
3  
4  
5  
6  
7  
8  
9  
10  
11  
12  
13  
14  
15  
16  
17  
18  
19  
20  
21  
22  
23  
24  
25  
26  
27  
28  
29  
30  
31  
32  
33  
34  
35  
36  
37  
38  
39  
40  
41  
42  
43  
44  
45  
46

|                                       |      |      |      |     |      |      |      |     |      |      |      |     |
|---------------------------------------|------|------|------|-----|------|------|------|-----|------|------|------|-----|
| Vascular diseases                     | 0.47 | 0.42 | 0.53 | *** | 0.63 | 0.61 | 0.66 | *** | 0.71 | 0.67 | 0.74 | *** |
| <b>From HAS-BLED score</b>            |      |      |      |     |      |      |      |     |      |      |      |     |
| Abnormal renal function               | 0.17 | 0.15 | 0.19 | *** | 0.31 | 0.30 | 0.33 | *** | 0.40 | 0.38 | 0.42 | *** |
| Abnormal liver function               | 0.46 | 0.39 | 0.54 | *** | 0.58 | 0.54 | 0.62 | *** | 0.60 | 0.57 | 0.64 | *** |
| Bleeding predisposition               | 0.53 | 0.47 | 0.59 | *** | 0.63 | 0.60 | 0.65 | *** | 0.70 | 0.67 | 0.72 | *** |
| Major bleeding                        | 0.23 | 0.20 | 0.26 | *** | 0.36 | 0.33 | 0.39 | *** | 0.41 | 0.38 | 0.45 | *** |
| Alcohol abuse                         | 0.55 | 0.48 | 0.62 | *** | 0.69 | 0.65 | 0.72 | *** | 0.68 | 0.65 | 0.72 | *** |
| Drug-drug interactions                | 0.22 | 0.20 | 0.24 | *** | 0.36 | 0.34 | 0.37 | *** | 0.40 | 0.37 | 0.43 | *** |
| Parenteral anticoagulants             | 0.04 | 0.03 | 0.06 | *** | 0.07 | 0.06 | 0.07 | *** | 0.07 | 0.06 | 0.07 | *** |
| Antiplatelets drugs                   | 0.34 | 0.31 | 0.37 | *** | 0.49 | 0.47 | 0.51 | *** | 0.56 | 0.53 | 0.60 | *** |
| NSAIDs                                | 1.80 | 1.43 | 2.28 | *** | 1.24 | 1.12 | 1.38 | *** | 1.18 | 1.06 | 1.32 | **  |
| <b>Other comorbidities</b>            |      |      |      |     |      |      |      |     |      |      |      |     |
| Valvular heart diseases               | 0.25 | 0.20 | 0.31 | *** | 0.40 | 0.36 | 0.45 | *** | 0.47 | 0.41 | 0.54 | *** |
| Ischemic heart diseases               | 0.51 | 0.46 | 0.56 | *** | 0.65 | 0.63 | 0.67 | *** | 0.74 | 0.71 | 0.77 | *** |
| Frailty (proxies)                     | 0.48 | 0.45 | 0.51 | *** | 0.58 | 0.55 | 0.61 | *** | 0.64 | 0.62 | 0.66 | *** |
| Dementia or Parkinson's disease       | 0.66 | 0.60 | 0.72 | *** | 0.82 | 0.78 | 0.85 | *** | 0.77 | 0.75 | 0.80 | *** |
| Psychiatric disorders                 | 0.74 | 0.70 | 0.78 | *** | 0.86 | 0.84 | 0.88 | *** | 0.86 | 0.84 | 0.88 | *** |
| Smoking                               | 0.56 | 0.52 | 0.60 | *** | 0.71 | 0.69 | 0.74 | *** | 0.74 | 0.71 | 0.76 | *** |
| <b>Comedications</b>                  |      |      |      |     |      |      |      |     |      |      |      |     |
| Antiarrhythmics or cardiac glycosides | 1.42 | 1.35 | 1.50 | *** | 1.22 | 1.19 | 1.25 | *** | 1.18 | 1.16 | 1.20 | *** |
| Lipid-lowering agents                 | 0.76 | 0.71 | 0.81 | *** | 0.81 | 0.79 | 0.84 | *** | 0.90 | 0.87 | 0.92 | *** |
| Oral corticosteroids                  | 0.85 | 0.80 | 0.91 | *** | 0.94 | 0.91 | 0.97 | *** | 0.94 | 0.91 | 0.96 | *** |
| Antiulcer agents                      | 0.61 | 0.56 | 0.66 | *** | 0.73 | 0.71 | 0.75 | *** | 0.78 | 0.75 | 0.81 | *** |
| Polymedication (≥5 ATC classes)       | 0.37 | 0.35 | 0.40 | *** | 0.55 | 0.54 | 0.57 | *** | 0.60 | 0.59 | 0.62 | *** |
| Polymedication (≥10 ATC classes)      | 0.33 | 0.30 | 0.36 | *** | 0.49 | 0.46 | 0.52 | *** | 0.54 | 0.51 | 0.57 | *** |

NOAC: Non vitamin K antagonist oral anticoagulant; VKA: vitamin K antagonist; OAC: oral anticoagulant; RR: Relative risk; IC: Confidence interval; ATE: arterial thromboembolic events (ischaemic stroke, arterial systemic embolism or transient ischaemic attack); NSAIDs: non-steroidal anti-inflammatory drugs  
 \* RR determined using negative binomial regression analysis adjusting for age and sex(except for age and sex covariates, adjusted for sex and for age only, respectively).  
 † p-values : \*\*\*  $p < 0,001$  ; \*\*  $p < 0,01$  ; \*  $p < 0,05$   
 Reading example: Age and sex being equal, frailty reduced the probability for a prescription of dabigatran (instead of VKA) by 52% (1 minus the estimated RR of 0.48). For rivaroxaban and apixaban, this reduction was 42% and 36%, respectively.

**Supplementary Table 3. Comparison of selected baseline characteristics of DOAC new users with AF at risk of stroke according to level of HAS-BLED score and type of DOAC dose.**

| N (%)                                         | Patients with CHA2DS2-VASc $\geq 2$ (N=116,391) |                               |                              |                               | Patients aged $\geq 75$ years old and history of ATE (N=9,503) |                              |                             |                            |
|-----------------------------------------------|-------------------------------------------------|-------------------------------|------------------------------|-------------------------------|----------------------------------------------------------------|------------------------------|-----------------------------|----------------------------|
|                                               | HAS-BLED $\geq 3$ (N=30 273)                    |                               | HAS-BLED $<3$ (N=86 118)     |                               | HAS-BLED $\geq 3$ (N=7,143)                                    |                              | HAS-BLED $<3$ (N=2,360)     |                            |
|                                               | Reduced doses*<br>(N=16,090)                    | Standard doses*<br>(N=14,183) | Reduced doses*<br>(N=33,845) | Standard doses*<br>(N=52,273) | Reduced doses*<br>(N=4,178)                                    | Standard doses*<br>(N=2,965) | Reduced doses*<br>(N=1,379) | Standard doses*<br>(N=981) |
| Age (years), mean                             | 81.8                                            | 74.8                          | 81.3                         | 70.9                          | 84.8                                                           | 81.1                         | 81.3                        | 70.9                       |
| Age $\geq 80$ years                           | 10,786 (67.0)                                   | 3,982 (28.1)                  | 22,962 (67.8)                | 9,984 (19.1)                  | 3,496 (83.7)                                                   | 1,720 (58.0)                 | 1,188 (86.1)                | 567 (57.8)                 |
| First prescriber's specialty                  |                                                 |                               |                              |                               |                                                                |                              |                             |                            |
| Hospital practitioner or private cardiologist | 12,315 (76.6)                                   | 11,364 (80.1)                 | 25,221 (74.5)                | 41,728 (79.8)                 | 3216 (77.0)                                                    | 2965 (80.2)                  | 1013 (73.5)                 | 798 (81.3)                 |
| General practitioner                          | 3321 (20.6)                                     | 2426 (17.1)                   | 7836 (23.2)                  | 9302 (17.8)                   | 860 (20.6)                                                     | 503 (17.0)                   | 322 (23.4)                  | 157 (16.0)                 |
| Frailty (proxies)                             | 6,689 (41.6)                                    | 4,600 (32.4)                  | 6,932 (20.5)                 | 4,779 (9.1)                   | 2,599 (62.2)                                                   | 1,642 (55.4)                 | 589 (42.7)                  | 316 (32.2)                 |
| Dementia or Parkinson's disease               | 2121 (13.2)                                     | 935 (6.6)                     | 3169 (9.4)                   | 1555 (3.0)                    | 789 (18.9)                                                     | 355 (12.0)                   | 259 (18.8)                  | 111 (11.3)                 |
| Any valvular diseases†                        | 2,640 (16.4)                                    | 1,809 (12.8)                  | 2,740 (8.1)                  | 3,342 (6.4)                   | 566 (13.5)                                                     | 330 (11.1)                   | 144 (10.4)                  | 95 (9.7)                   |
| Prosthetic heart valve†                       | 544 (3.4)                                       | 384 (2.7)                     | 425 (1.3)                    | 474 (0.9)                     | 94 (2.2)                                                       | 52 (1.8)                     | 19 (1.4)                    | 14 (1.4)                   |
| Ischaemic heart disease                       | 7,232 (44.9)                                    | 5,274 (37.2)                  | 6,827 (20.2)                 | 9,142 (17.5)                  | 1,338 (32.0)                                                   | 758 (25.6)                   | 336 (24.4)                  | 185 (18.9)                 |
| Antiplatelet agents at initiation             | 6,035 (37.5)                                    | 4,891 (34.5)                  | 620 (1.8)                    | 1,264 (2.4)                   | 874 (20.9)                                                     | 510 (17.2)                   | 11 (0.8)                    | 7 (0.7)                    |
| Lipid-lowering agents                         | 9252 (57.5)                                     | 9213 (65.0)                   | 12836 (37.9)                 | 21820 (41.7)                  | 2606 (62.4)                                                    | 2132 (71.9)                  | 697 (50.5)                  | 611 (62.3)                 |
| Polymedication ( $\geq 10$ ATC classes)       | 3,627 (22.5)                                    | 2,946 (20.8)                  | 2,150 (6.4)                  | 2,798 (5.4)                   | 788 (18.9)                                                     | 473 (16.0)                   | 104 (7.5)                   | 67 (6.8)                   |

\* Reduced-dose DOAC: dabigatran 150mg, Rivaroxaban 20 and apixaban 5mg; reduced-dose DOAC: dabigatran 75mg and 110mg, rivaroxaban 10mg and 15mg and apixaban 2.5mg

† Covariates defined by hospitalization data only

## STROBE Statement—checklist of items that should be included in reports of observational studies

|                              | Item No | Recommendation                                                                                                                                                                                                                                                                                                                                                                                                                                                         | Page No  |
|------------------------------|---------|------------------------------------------------------------------------------------------------------------------------------------------------------------------------------------------------------------------------------------------------------------------------------------------------------------------------------------------------------------------------------------------------------------------------------------------------------------------------|----------|
| <b>Title and abstract</b>    | 1       | (a) Indicate the study's design with a commonly used term in the title or the abstract                                                                                                                                                                                                                                                                                                                                                                                 | 1        |
|                              |         | (b) Provide in the abstract an informative and balanced summary of what was done and what was found                                                                                                                                                                                                                                                                                                                                                                    | 2        |
| <b>Introduction</b>          |         |                                                                                                                                                                                                                                                                                                                                                                                                                                                                        |          |
| Background/rationale         | 2       | Explain the scientific background and rationale for the investigation being reported                                                                                                                                                                                                                                                                                                                                                                                   | 4        |
| Objectives                   | 3       | State specific objectives, including any prespecified hypotheses                                                                                                                                                                                                                                                                                                                                                                                                       | 4        |
| <b>Methods</b>               |         |                                                                                                                                                                                                                                                                                                                                                                                                                                                                        |          |
| Study design                 | 4       | Present key elements of study design early in the paper                                                                                                                                                                                                                                                                                                                                                                                                                | 5,6      |
| Setting                      | 5       | Describe the setting, locations, and relevant dates, including periods of recruitment, exposure, follow-up, and data collection                                                                                                                                                                                                                                                                                                                                        | 5        |
| Participants                 | 6       | (a) <i>Cohort study</i> —Give the eligibility criteria, and the sources and methods of selection of participants. Describe methods of follow-up<br><i>Case-control study</i> —Give the eligibility criteria, and the sources and methods of case ascertainment and control selection. Give the rationale for the choice of cases and controls<br><i>Cross-sectional study</i> —Give the eligibility criteria, and the sources and methods of selection of participants | 5,6      |
|                              |         | (b) <i>Cohort study</i> —For matched studies, give matching criteria and number of exposed and unexposed<br><i>Case-control study</i> —For matched studies, give matching criteria and the number of controls per case                                                                                                                                                                                                                                                 | NA       |
| Variables                    | 7       | Clearly define all outcomes, exposures, predictors, potential confounders, and effect modifiers. Give diagnostic criteria, if applicable                                                                                                                                                                                                                                                                                                                               | 6        |
| Data sources/<br>measurement | 8*      | For each variable of interest, give sources of data and details of methods of assessment (measurement). Describe comparability of assessment methods if there is more than one group                                                                                                                                                                                                                                                                                   | 6,7,8    |
| Bias                         | 9       | Describe any efforts to address potential sources of bias                                                                                                                                                                                                                                                                                                                                                                                                              | 7,8      |
| Study size                   | 10      | Explain how the study size was arrived at                                                                                                                                                                                                                                                                                                                                                                                                                              | 9, Fig 2 |
| Quantitative variables       | 11      | Explain how quantitative variables were handled in the analyses. If applicable, describe which groupings were chosen and why                                                                                                                                                                                                                                                                                                                                           | 7        |
| Statistical methods          | 12      | (a) Describe all statistical methods, including those used to control for confounding                                                                                                                                                                                                                                                                                                                                                                                  | 7,8      |
|                              |         | (b) Describe any methods used to examine subgroups and interactions                                                                                                                                                                                                                                                                                                                                                                                                    | 7,8      |
|                              |         | (c) Explain how missing data were addressed                                                                                                                                                                                                                                                                                                                                                                                                                            | NA       |
|                              |         | (d) <i>Cohort study</i> —If applicable, explain how loss to follow-up was addressed<br><i>Case-control study</i> —If applicable, explain how matching of cases and controls was addressed<br><i>Cross-sectional study</i> —If applicable, describe analytical methods taking account of sampling strategy                                                                                                                                                              | NA       |
|                              |         | (e) Describe any sensitivity analyses                                                                                                                                                                                                                                                                                                                                                                                                                                  | 7,8      |

Continued on next page

| <b>Results</b>           |     |                                                                                                                                                                                                              |                     |
|--------------------------|-----|--------------------------------------------------------------------------------------------------------------------------------------------------------------------------------------------------------------|---------------------|
| Participants             | 13* | (a) Report numbers of individuals at each stage of study—eg numbers potentially eligible, examined for eligibility, confirmed eligible, included in the study, completing follow-up, and analysed            | 9<br>Fig 2          |
|                          |     | (b) Give reasons for non-participation at each stage                                                                                                                                                         | 9                   |
|                          |     | (c) Consider use of a flow diagram                                                                                                                                                                           | Fig 2               |
| Descriptive data         | 14* | (a) Give characteristics of study participants (eg demographic, clinical, social) and information on exposures and potential confounders                                                                     | Table 1             |
|                          |     | (b) Indicate number of participants with missing data for each variable of interest                                                                                                                          | NA                  |
|                          |     | (c) <i>Cohort study</i> —Summarise follow-up time (eg, average and total amount)                                                                                                                             | NA                  |
| Outcome data             | 15* | <i>Cohort study</i> —Report numbers of outcome events or summary measures over time                                                                                                                          | NA                  |
|                          |     | <i>Case-control study</i> —Report numbers in each exposure category, or summary measures of exposure                                                                                                         | NA                  |
|                          |     | <i>Cross-sectional study</i> —Report numbers of outcome events or summary measures                                                                                                                           | Fig 2, 3<br>Table 2 |
| Main results             | 16  | (a) Give unadjusted estimates and, if applicable, confounder-adjusted estimates and their precision (eg, 95% confidence interval). Make clear which confounders were adjusted for and why they were included | Table 2             |
|                          |     | (b) Report category boundaries when continuous variables were categorized                                                                                                                                    | Table 2             |
|                          |     | (c) If relevant, consider translating estimates of relative risk into absolute risk for a meaningful time period                                                                                             | NA                  |
| Other analyses           | 17  | Report other analyses done—eg analyses of subgroups and interactions, and sensitivity analyses                                                                                                               | 9, 10               |
| <b>Discussion</b>        |     |                                                                                                                                                                                                              |                     |
| Key results              | 18  | Summarise key results with reference to study objectives                                                                                                                                                     | 11                  |
| Limitations              | 19  | Discuss limitations of the study, taking into account sources of potential bias or imprecision. Discuss both direction and magnitude of any potential bias                                                   | 13                  |
| Interpretation           | 20  | Give a cautious overall interpretation of results considering objectives, limitations, multiplicity of analyses, results from similar studies, and other relevant evidence                                   | 11, 12              |
| Generalisability         | 21  | Discuss the generalisability (external validity) of the study results                                                                                                                                        | 12                  |
| <b>Other information</b> |     |                                                                                                                                                                                                              |                     |
| Funding                  | 22  | Give the source of funding and the role of the funders for the present study and, if applicable, for the original study on which the present article is based                                                | 14                  |

\*Give information separately for cases and controls in case-control studies and, if applicable, for exposed and unexposed groups in cohort and cross-sectional studies.

**Note:** An Explanation and Elaboration article discusses each checklist item and gives methodological background and published examples of transparent reporting. The STROBE checklist is best used in conjunction with this article (freely available on the Web sites of PLoS Medicine at <http://www.plosmedicine.org/>, Annals of Internal Medicine at <http://www.annals.org/>, and Epidemiology at <http://www.epidem.com/>). Information on the STROBE Initiative is available at [www.strobe-statement.org](http://www.strobe-statement.org).

# BMJ Open

## Oral anticoagulation therapy use in patients with atrial fibrillation after the introduction of non-vitamin K antagonist oral anticoagulants: findings from the French healthcare databases, 2011-2016

|                                 |                                                                                                                                                                                                                                                                                                                                                                                                                                                                                                                                                                                                                                                                                                                                                                                                                                                                                                                                                                             |
|---------------------------------|-----------------------------------------------------------------------------------------------------------------------------------------------------------------------------------------------------------------------------------------------------------------------------------------------------------------------------------------------------------------------------------------------------------------------------------------------------------------------------------------------------------------------------------------------------------------------------------------------------------------------------------------------------------------------------------------------------------------------------------------------------------------------------------------------------------------------------------------------------------------------------------------------------------------------------------------------------------------------------|
| Journal:                        | <i>BMJ Open</i>                                                                                                                                                                                                                                                                                                                                                                                                                                                                                                                                                                                                                                                                                                                                                                                                                                                                                                                                                             |
| Manuscript ID                   | bmjopen-2018-026645.R2                                                                                                                                                                                                                                                                                                                                                                                                                                                                                                                                                                                                                                                                                                                                                                                                                                                                                                                                                      |
| Article Type:                   | Research                                                                                                                                                                                                                                                                                                                                                                                                                                                                                                                                                                                                                                                                                                                                                                                                                                                                                                                                                                    |
| Date Submitted by the Author:   | 04-Feb-2019                                                                                                                                                                                                                                                                                                                                                                                                                                                                                                                                                                                                                                                                                                                                                                                                                                                                                                                                                                 |
| Complete List of Authors:       | MAURA, Géric; French National Health Insurance (Caisse Nationale de l'Assurance Maladie/Cnam), Department of Studies in Public Health; University of Bordeaux, Inserm, Bordeaux Population Health Research Center, team Pharmacoepidemiology - UMR 1219, Billionnet, Cécile; French National Health Insurance (Caisse Nationale de l'Assurance Maladie/Cnam), Department of Studies in Public Health Drouin, Jérôme; French National Health Insurance (Caisse Nationale de l'Assurance Maladie/Cnam), Department of Studies in Public Health Weill, Alain; French National Health Insurance (Caisse Nationale de l'Assurance Maladie/Cnam), Department of Studies in Public Health Neumann, Anke; French National Health Insurance (Caisse Nationale de l'Assurance Maladie/Cnam), Department of Studies in Public Health Pariente, Antoine; University of Bordeaux, Inserm, Bordeaux Population Health Research Center, team Pharmacoepidemiology - UMR 1219; CHU Bordeaux |
| <b>Primary Subject Heading</b>: | Cardiovascular medicine                                                                                                                                                                                                                                                                                                                                                                                                                                                                                                                                                                                                                                                                                                                                                                                                                                                                                                                                                     |
| Secondary Subject Heading:      | Cardiovascular medicine, Epidemiology, Pharmacology and therapeutics, Public health                                                                                                                                                                                                                                                                                                                                                                                                                                                                                                                                                                                                                                                                                                                                                                                                                                                                                         |
| Keywords:                       | Anticoagulation < HAEMATOLOGY, dabigatran, rivaroxaban, apixaban, claims database, France                                                                                                                                                                                                                                                                                                                                                                                                                                                                                                                                                                                                                                                                                                                                                                                                                                                                                   |
|                                 |                                                                                                                                                                                                                                                                                                                                                                                                                                                                                                                                                                                                                                                                                                                                                                                                                                                                                                                                                                             |

SCHOLARONE™  
Manuscripts

**Title page**

**Oral anticoagulation therapy use in patients with atrial fibrillation after the introduction of non-vitamin K antagonist oral anticoagulants: findings from the French healthcare databases, 2011-2016.**

**Running title:** Patterns of OAC use

Géric Maura PharmD, PhD<sup>1,2</sup>, Cécile Billionnet MSc, PhD<sup>1</sup>, Jérôme Drouin, MSc<sup>1</sup>, Alain Weill MD<sup>1</sup>,  
Anke Neumann MSc, PhD<sup>1</sup>, Antoine Pariente MD, PhD<sup>2,3</sup>

<sup>1</sup> Department of Studies in Public Health, French National Health Insurance (Caisse Nationale de l'Assurance Maladie/Cnam), 75 986 Paris Cedex 20, France.

<sup>2</sup> University of Bordeaux, Inserm, Bordeaux Population Health Research Center, team  
Pharmacoepidemiology - UMR 1219, F-33000 Bordeaux, France

<sup>3</sup> CHU de Bordeaux, Pharmacologie, F-33000 Bordeaux, France

**Address for correspondence:** Géric MAURA, Cnam/DSES/DESP, National Health Insurance, 50 avenue du Pr. André Lemierre, 75986 Paris cedex 20; E-mail: geric.maura@assurance-maladie.fr; Telephone: +33(0)172602338; Fax: +33(0)172601724

Word count of text: (excluding the title page, abstract, tables, acknowledgements, contributions and references): 4,231

Word count of abstract: 300/300

Number of references: 64

Number of tables: 2

Number of figures: 3

Number of supplementary tables: 3

## Abstract

**Objectives:** To describe i) the trend in oral anticoagulant (OAC) use following the introduction of Non-vitamin K antagonist oral anticoagulant (NOAC) therapy for stroke prevention in atrial fibrillation (AF) patients; ii) the current patterns of use of NOAC therapy in new users with AF in France.

**Design:** i) Repeated cross-sectional study; ii) Population-based cohort study.

**Setting:** French National Healthcare databases (50 million beneficiaries).

**Participants:** i) Patients with identified AF in 2011, 2013, and 2016; ii) Patients with AF initiating OAC therapy in 2015-2016.

**Primary and secondary outcome measures:** i) Trend in oral anticoagulant therapy use in patients with AF; ii) Patterns of use of NOAC therapy in new users with AF.

**Results:** Between 2011 and 2016, use of OAC therapy moderately increased (+16%), while use of antiplatelet therapy decreased (-22%) among all patients with identified AF. In 2016, among the 1.1 million AF patients, 66% used OAC therapy and were more likely to be treated by VKA than NOAC therapy, including patients at higher risk of stroke (63.5%), while 33% used antiplatelet therapy. Among 192,851 new users of OAC therapy in 2015-2016 with identified AF, NOAC therapy (66.3%) was initiated more frequently than VKA therapy, including in patients at higher risk of stroke (57.8%). Reduced doses were prescribed in 40% of NOAC new users. Several situations of inappropriate use at NOAC initiation were identified, including concomitant use of drugs increasing the risk of bleeding (one in three new users) and potential NOAC underdosing.

**Conclusions:** OAC therapy use in AF patients remains suboptimal 4 years after the introduction of NOACs for stroke prevention in France and improvement in appropriate prescribing regarding NOAC initiation is needed. However, NOAC therapy is now the preferred drug class for initiation of OAC therapy in patients with AF, including in patients at higher risk of stroke.



**Strengths and limitations of this study**

- This study is the first to report both the 2011-2016 trend in oral anticoagulant (OAC) coverage in patients with atrial fibrillation (AF) following the introduction of Non-vitamin K antagonist oral anticoagulant (NOAC) therapy in France and the current patterns of use of NOACs in new users including assessment of potential inappropriate use;
- This study is based on reimbursement data for 50 million beneficiaries with access to all OAC prescriptions filled in the ambulatory setting;
- As indications for treatment are not available in the databases, AF was mostly identified on the basis of discharge and long-term disease diagnosis codes and an algorithm previously validated in the French healthcare databases that helped to further identify AF in outpatients.

## Introduction

Non-vitamin K antagonist Oral AntiCoagulants (NOACs) have been gradually introduced over the past decade as a more convenient, fixed-dose alternative to vitamin K antagonists (VKAs), the only oral anticoagulant therapy available up until now for long-term stroke prevention in patients with non-valvular atrial fibrillation (AF) [1]. Compared to VKA, NOAC therapy avoids the need for regular laboratory monitoring of patients by INR testing due to a wider therapeutic window, allows once (rivaroxaban, edoxaban) or twice (dabigatran, apixaban) daily intake and is associated with fewer drug-drug interactions to date [2–6]. NOACs have been demonstrated to have similar or superior efficacy to warfarin for stroke prevention in nv-AF patients, and these findings have recently been implemented in the 2016 European Society of Cardiology (ESC) guidelines that recommended NOAC over VKA therapy in this indication [7]. Moreover, antiplatelet therapy is no longer recommended in these patients [7,8]. The use of NOAC therapy, massively adopted worldwide including in France [9–15], is expected to overcome the suboptimal use of oral anticoagulant (OAC) therapy extensively reported with VKA therapy, including underprescribing and high discontinuation rates [16,17].

Despite their improved ease of use, NOAC prescribed dose needs to be adjusted to the patient's clinical profile with regards to age, renal function, weight, and risks of bleeding and drug-drug interactions. Two dose regimens are therefore proposed for each NOAC: standard dose regimen (*i.e.* dabigatran 150mg/12h, rivaroxaban 20mg/24h; apixaban 5mg/12h), and reduced-dose regimen (*i.e.* dabigatran 75mg or 110mg/12h, rivaroxaban 10mg or 15mg/24h; apixaban 2.5mg/12h). The reasons for prescribing a reduced-dose regimen are listed in the summary of product characteristics (SmPCs) of each NOAC with differences across NOACs as well as in the ESC [7,8] and European Heart Rhythm Association (EHRA) guidelines [18]. Recent publications have suggested that the frequency of use of reduced-dose NOACs in clinical practice could largely exceed that expected on the basis of the conditions summarized in these guidelines [11,19–21]. However, national data are lacking concerning the current French patterns of NOAC use, including the potential issue of NOAC underdosing.

A steady increase in the initiation of NOAC therapy has already been reported in AF patients in France [14], but trends in OAC coverage of AF patients following the introduction of NOACs and a description of the current national patterns of NOAC use have not yet been reported. This study, based on the French nationwide healthcare databases, therefore had a twofold objective: 1) to describe the trends in OAC use following the introduction of NOAC for stroke prevention in AF patients during the 2011-2016 period; 2) to describe the current patterns of use of OAC therapies with particular focus on NOAC use in new users with AF.

## Methods

### Data source

French national health insurance (*Assurance Maladie*) covers the entire French population by means of several specific schemes according to the beneficiary's occupational sector, the largest scheme being the '*Régime général*' (around 50 million beneficiaries).

This study was conducted using data from the French health insurance system database (*Système national d'information inter-régimes de l'Assurance maladie*, SNIIRAM) linked to the French hospital discharge database (*Programme de médicalisation des systèmes d'information*, PMSI) [22,23]. The SNIIRAM database contains individualized, anonymous, and comprehensive data on health spending reimbursements. Demographic data include date of birth, gender, and vital status. Drugs are coded according to the Anatomical Therapeutic Chemical (ATC) classification. Each packaging of each product is identified by means of a national specific pack identifier code providing information on the name of the product, active ingredient and dose per unit, number of units, and route of administration; but, the exact dosage prescribed and the indication are not available. However, for most drugs, particularly OACs, each dispensing of the prescribed drug cannot exceed the quantity necessary for one month of treatment. The PMSI database provides detailed information about discharge diagnoses and medical procedures related to all hospitalizations in France. This information regarding morbidities is completed by diagnoses corresponding to patient eligibility for 100% reimbursement of severe and costly long-term diseases (LTD) and disability, such as AF, coronary heart disease, certain debilitating diseases (such as multiple sclerosis or rheumatoid arthritis), HIV infection, cancer, etc. All information concerning medical diagnosis is encoded according to the International Classification of Diseases, 10th revision (ICD-10). Finally, the SNIIRAM-PMSI databases also indicate medical procedures performed in the ambulatory setting, including information about the type and date of all laboratory tests performed, but not including their results.

The French healthcare databases have been previously described and used in epidemiological and pharmacoepidemiological studies [22,24–26].

### Study populations and study designs

Two study populations were defined; one for each objective.

To answer the first objective, a repeated cross-sectional study was performed to describe the trends in OAC use following the introduction of NOAC in AF patients. Patients with AF were identified in 2011 (as none of the NOACs was available for stroke prevention in France) and 2016 (the most recent data available at the time of writing the study protocol; dabigatran, rivaroxaban and apixaban were all reimbursed for stroke prevention in France, as apixaban was reimbursed from January 2014

1  
2  
3 onwards). OAC coverage was also calculated for year 2013 as this year represented the first calendar  
4 year for which the first two NOACs were available in France, i.e. a pivotal year for the  
5 pharmacological management of AF by oral anticoagulants. For each of these calendar years, a  
6 patient was considered to have AF when at least one diagnosis of AF (ICD-10 code I48) was identified  
7 from discharge and LTD diagnoses in the SNIIRAM-PMSI database in the calendar year considered or  
8 during the previous 5 years. Patients with no continuous '*Régime général*' health insurance coverage  
9 for at least six years before the calendar year considered were excluded.

10 To answer the second objective, a population-based cohort study was performed including patients  
11 with AF initiating OAC therapy in 2015-2016. First, OAC new users were identified among patients  
12 with continuous '*Régime général*' health insurance coverage as those with at least one  
13 reimbursement for OAC therapy in 2015-2016 and no reimbursement for any OAC (VKA or NOAC) in  
14 the previous 24 months. The patient's index date was the date of first OAC reimbursement identified  
15 during the 2015-2016 period. Second, the cohort of NOAC news users was restricted to those treated  
16 for AF: (i) patients treated for other OAC indications *i.e.* patients treated for deep vein  
17 thrombosis/pulmonary embolism (DVT/PE) or with lower limb orthopaedic procedures were  
18 excluded; (ii) OAC new users treated for AF were identified from the resulting cohort as the sum of  
19 "OAC new users with confirmed AF" for those with a diagnosis of AF (ICD-10 code I48) or specific AF  
20 management procedures identified from LTD or hospitalization discharge data during a six-year pre-  
21 index period, and "OAC new users with probable AF" for outpatients identified using an algorithm  
22 discriminating AF from DVT/PE with 95% specificity [27]. The remaining patients were not classified  
23 as probable FA patients and were excluded. Codes used for identification of AF and all of the patient  
24 characteristics considered, including comorbidities, are displayed in **Supplementary Table 1**.

### 41 **Patient and public involvement**

42 Patients and or public were not involved.

### 45 **Exposure**

46 NOAC (dabigatran, rivaroxaban, apixaban) and VKA therapies (fluindione, warfarin and  
47 acenocoumarol) were identified using ATC codes; edoxaban was not available in France during the  
48 period considered.

### 52 **Outcomes**

53 Trends in oral anticoagulant therapy use in patients with AF

54 The proportion of AF patients treated by OAC therapy was assessed before and after approval of  
55 NOAC therapies for stroke prevention in France. Trends in the use of antiplatelet agents were also  
56 assessed in AF patients over the same timeframe.

### Patterns of use of NOAC therapy in new users with AF

The description of patterns of NOAC use in new users treated for AF in 2015-2016 included comparison of the baseline characteristics among NOAC new users and compared to those of VKA new users and potential inappropriate use of NOAC therapy was then investigated by identifying:

(i) NOAC off-label use or non-approved indication/dose: contraindications to NOAC therapy according to SmPCs [concomitant coagulopathy, purpura and other haemorrhagic conditions, liver fibrosis and cirrhosis, recent gastrointestinal ulceration or intracranial haemorrhage], valvular atrial fibrillation [NOAC are only approved for non-valvular AF], prosthetic heart valve [contraindicated for dabigatran], cancer [NOAC are not approved for prevention of thromboembolism in patients with cancer] and prescription of NOAC doses not approved for stroke prevention in Europe [dabigatran 75 mg and rivaroxaban 10 mg are not approved for stroke prevention in Europe and are therefore off-label doses in AF patients]; (ii) non-compliance with guidelines with respect to follow-up and clinical work-up of patients during the first year following NOAC initiation: no monitoring of patients' renal function [renal function should be assessed at initiation and annually during NOAC therapy [28]], discontinuation of NOAC therapy [OAC therapy is recommended as lifetime treatment in most patients with AF] (iii) clinically relevant drug-drug interactions at initiation increasing the bleeding risk at initiation; (iv) potential inappropriate underdosing, i.e. patients in whom the NOAC dose prescribed at initiation was inappropriately reduced in view of their individual stroke and bleeding risks.

### Data analysis

Descriptive analyses are expressed as mean and standard deviation (SD) for continuous variables, and numbers and percentages for categorical variables.

### Trends in oral anticoagulant therapy use in patients with AF

For each calendar year, the proportion of patients treated by a drug was defined by the number of patients with at least one reimbursement for this drug in the calendar year considered over the total number of patients identified as having AF in the same year. Proportions are reported according to the type of OAC first reimbursed in the year considered. Antiplatelet drugs and OAC therapies were considered to be coprescribed when they were reimbursed at least once on the same day during the calendar year studied. Analyses were replicated in subgroups of AF patients: (i) aged 75 years and over; (ii) female and male, separately; (iii) with a history of hospitalization for arterial thromboembolic events (ATE); (iv) with concomitant ischaemic heart disease (IHD) or prosthetic heart valve.

### *Patterns of use of NOAC therapy in new users with AF*

Baseline characteristics of NOAC new users with AF included sociodemographic data, including deprivation index of the patient's municipality of residence [29], type of initial prescriber, clinical scores predicting the risk of stroke (CHA<sub>2</sub>DS<sub>2</sub>-VASc score) or bleeding (HAS-BLED score) [30,31], adapted to claims data and the other main comorbidities and comedications, including proxies of frailty. A negative binomial regression analysis for each NOAC therapy and each baseline characteristic was performed to assess the association between these characteristics and the choice of NOAC therapy *versus* VKA therapy, while adjusting for age and sex.

Compliance with guidelines regarding renal function monitoring and treatment persistence patterns were assessed in new users for whom data for at least one year of follow-up were available, i.e. patients included in 2015 and who had not died and had not been hospitalized for 3 months or longer. Compliance with renal function monitoring was assessed at NOAC initiation (no reimbursement for renal function monitoring during the three months before and the three months after NOAC initiation) and during the first year following treatment initiation. OAC non-persistence patterns were assessed over the one-year period following the index date by calculating proxies of OAC discontinuation: number of patients with only one reimbursement and one-year crude discontinuation rates.

Drugs increasing the risk of bleeding were those responsible for clinically relevant pharmacodynamic interactions with OAC therapy, i.e. concomitant reimbursement of other parenteral and oral antithrombotic drugs, non-steroidal anti-inflammatory drugs (NSAIDs); selective serotonin reuptake inhibitors and selective serotonin-norepinephrine reuptake inhibitors (SSRIs and SSNRIs) [7,18,32]. Patients taking concomitant drugs with OAC therapy were defined as those with a reimbursement for the drug of interest during the period corresponding to the index date and the following 45 days. Analyses were replicated in VKA new users for descriptive purposes.

Finally, potential inappropriate underdosing with NOACs was defined as initiation of NOAC therapy in patients at risk of stroke in whom reduced doses of NOAC were prescribed with no identified justification. As this study was based on claims data and as, up until 2016, ESC guidelines recommended prescribing reduced-dose NOAC in patients with HAS-BLED $\geq$ 3 [8], the proportion of AF patients initiating reduced-dose NOAC with an HAS-BLED score $<$ 3 among all NOAC new users with a CHA<sub>2</sub>DS<sub>2</sub>-VASc score  $\geq$ 2 was used to quantify potential inappropriate underdosing in NOAC new users. Analyses were replicated in patients i) with CHA<sub>2</sub>DS<sub>2</sub>-VASc score  $\geq$ 4, ii) aged 75 and over with a history of ATE.

## Results

### Trends in oral anticoagulant therapy use in patients with AF

The number of patients identified from French healthcare databases as having AF increased between 2011 (N=853,440) and 2016 (N=1,098,657). A high proportion of these patients were identified exclusively by hospitalization discharge diagnosis and this proportion decreased only slightly over this time interval from 90.2% (N=770,002) to 86.2% (N=946,657).

Between 2011 and 2016, the proportion of patients with at least one reimbursement for OAC therapy among all AF patients moderately increased (+16%) from 56.7% to 65.8%, corresponding to a steady decrease in VKA use (from 56.6% to 40.8% of all AF patients) associated with the introduction of NOACs (from 0.6% to 27.7%). In 2016, among patients with identified AF, VKA therapy remained the preferred OAC therapy (62.0%), including in patients aged 75 years and over (67.0%) and in those with a history of ATE (63.5%).

Between 2011 and 2016, the use of antiplatelet therapy decreased in AF patients (-22%), but the proportion of patients with concomitant OAC and antiplatelet therapy remained stable (9.7% in 2016). In 2016, 32.5% of AF patients had at least one reimbursement for antiplatelet therapy during the year.

Similar trends were observed in the subgroup analyses. A slightly higher rate of OAC therapy was observed in patients with a history of ATE (68.4% vs 65.8% in the total cohort in 2016). However, OAC coverage was lower in women than in men with AF (64.7% vs 66.8% in 2016) (**Figure 1**).

### Patterns of use of NOAC therapy in new users with AF

#### *Baseline characteristics of OAC new users*

Among 540,914 patients initiating OAC therapy in 2015-2016, a total of 192,851 (35.7%) patients were included in the study population, corresponding to 127,841 NOAC new users and 65,010 VKA new users with AF. The main reasons for ineligibility were other indications or uncertain identification of the indication for NOAC (**Figure 2**).

The mean age of the NOAC new users cohort was 74.1±11.6 years; patients over the age of 80 represented 37.3% of the total cohort. One-half of the NOAC new users were women, and 40.0% received a reduced dose at initiation (62.2% for dabigatran new users). Apixaban was the NOAC most commonly initiated; apixaban new users were older and had more comorbidities than the other two groups of NOAC new users. NOAC therapy was more likely to be initiated than VKA therapy among patients aged 75 years and older (59.4%) and in patients with a history of ATE (57.8%) (**Table 1**).

Characteristics associated with bleeding risk, such as older age, renal impairment, history of bleeding or bleeding predisposition, and treatment with a concomitant drug increasing the risk of bleeding at

1  
2  
3 OAC initiation, were strong predictors of being treated with VKA therapy *versus* NOAC therapies  
4 **(Supplementary Table 2)**.

5  
6  
7 *Potential inappropriate use of NOAC therapy*

8 About 15% of NOAC new users with AF were considered to be using NOAC off-label or for a non-  
9 approved indication. In particular, 8.5% of NOAC new users with AF had valvular heart disease (8.5%),  
10 including prosthetic heart valve (1.5%) and 4.6% had a recently or currently treated cancer **(Table 2)**.

11  
12 About 15% and 9% of NOAC new users had no reimbursement for renal function tests at initiation  
13 and during the one-year period post-initiation, respectively. Discontinuation during the one-year  
14 period following initiation was frequent, as more than 20% of patients had five or less  
15 reimbursements **(Table 2)**.

16  
17 Nearly 30% of NOAC new users were using at least one concomitant drug increasing the risk of  
18 bleeding (52% in VKA new users). The most common concomitant drugs concerned at initiation were  
19 antiplatelet agents or parenteral anticoagulants **(Table 2)**.

20  
21 Among the 116,391 NOAC new users with AF with a CHA<sub>2</sub>DS<sub>2</sub>-VASc score  $\geq 2$ , 29.1% (N=33,845) were  
22 prescribed a reduced dose although they had an HAS-BLED score  $< 3$ . This meant that nearly 1 in 3  
23 NOAC new users with AF and at risk of stroke were therefore potentially prescribed an  
24 inappropriately reduced dose of NOAC at initiation. This proportion was 33% (N=24,281) and 14.5%  
25 when defining patients at risk of stroke as patients with a CHA<sub>2</sub>DS<sub>2</sub>-VASc score  $\geq 4$  and aged 75 and  
26 over with a history of ATE, respectively **(Figure 3)**.

27  
28 Differences in baseline characteristics were observed in patients with HAS-BLED $< 3$  according to the  
29 type of NOAC dose prescribed, e.g. patients with reduced-dose NOAC were older and frailer than  
30 those with standard-dose NOAC **(Supplementary Table 3)**.



## Discussion

### Main findings

OAC therapy use among patients with AF improved in France between 2011 and 2016, but remained suboptimal with about 66% of the 1.1 million patients with identified AF treated by OAC therapy in 2016. Use of antiplatelet therapy in AF patients decreased over the same period, but still concerned 33% of all AF patients in 2016. Patients with AF were more likely to be treated by VKA than NOAC therapy, including older patients and those at higher risk of stroke.

Nearly 193,000 patients with AF were identified as OAC new users in 2015-2016: patients were more likely to be treated by NOAC than VKA therapy, including older patients and those at higher risk of stroke. Results on current patterns of use of NOAC therapy in new users with AF suggest several situations of inappropriate use, including frequent concomitant use of drugs increasing the risk of bleeding and potential inappropriate underdosing.

### Comparison with postmarketing literature and clinical implications

The overall improvement of management of AF patients observed with regards to OAC therapy after the introduction of NOACs has been reported in many countries [33–36]. The same applies to the steady decrease in VKA use in favour of NOAC therapies [12,37,38], and the gaps remaining in optimal OAC coverage and high antiplatelet drug use [39–41].

This study demonstrated channelling of NOAC therapy towards patients at lower risk of stroke and bleeding when considering all patients with AF, in line with what has become a common feature reported worldwide in clinical practice by many observational studies on the current patterns of use of NOACs [15,42–45]. In particular, data from the ESC-sponsored 'EURObservational Research Programme on AF' (EORP-AF) General Long-Term Registry showed that younger age, having fewer risk factors or a history of non-valvular heart diseases were also found to be clinical predictors for being treated with NOACs vs. VKAs [46].

However, NOAC therapy is now the preferred OAC therapy at initiation in the oldest patients and those at higher risk of stroke. This French pattern of OAC use has never been previously reported and contrasts with published results concerning earlier periods [47]. This emerging pattern is encouraging for AF management, as older and high-risk patients are those who should derive most benefit from NOAC *versus* VKA therapy [48].

Reduced doses were often prescribed in OAC new users, including dabigatran 75mg and rivaroxaban 10mg, which are not approved for stroke prevention in Europe [49]. In addition to the overall channelling mentioned above, these findings may reflect a "bleeding avoidance" strategy of prescribers (i.e. overestimation of the potential bleeding risk *versus* the likely benefit of stroke

1  
2  
3 reduction) and the differential perception of the comparative safety of NOACs *versus* VKA and  
4 between NOACs. The early safety alert on bleeding in dabigatran-treated patients, followed by the  
5 contraindication of this NOAC in patients with prosthetic heart valves, may have reinforced the fears  
6 of prescribers in relation to the safety of dabigatran, which would explain the difference in reduced-  
7 dose prescription rates between the three NOACs in this study, despite the intermediate stroke and  
8 bleeding risk profile of dabigatran compared to that of rivaroxaban and apixaban in new users.  
9 Similarly, among NOAC new users, apixaban was prescribed to the oldest and most severe patients.  
10 Apixaban was the only NOAC found to be superior to warfarin for all types of bleeding outcome and  
11 all-cause mortality, which would also illustrate the tendency of physicians to prescribe OAC therapies  
12 according to bleeding risk [5]. This may also explain the potential inappropriate underdosing  
13 observed in NOAC users in this study. This pattern of NOAC use has been previously reported, but  
14 mostly in field and registry studies based on small sample sizes. The reported inappropriate  
15 underdosing rate varies according to studies and the definition used. NOAC underdosing concerned  
16 30.4% of Turkish patients in the RAMSES study (N=2,086) [50], 18.4% of Japanese patients of the *KiCS*  
17 AF registry (N=1,284) [51,52], between 19.7% and 27.6% of patients in the SAKURA AF registry (N=  
18 3,266) [53], and 9.4% to 16% of patients in the ORBIT-AF II registry (N=7925) [21,54]. In the subgroup  
19 of Dutch patients (N=899) enrolled in the XANTUS registry, 33% of patients were also treated with  
20 reduced-dose rivaroxaban despite presenting normal renal function [55]. Using a large U.S.  
21 administrative database, Yao *et al* found that 13.3% of the 13,392 NOAC new users with no renal  
22 indication for dose reduction were potentially underdosed [56]. Taken together with our results,  
23 these data suggest that inappropriate underdosing might be a common issue in NOAC new users that  
24 should be systematically assessed when studying NOAC patterns of use. This is of particular concern,  
25 as recent data have suggested a relationship between NOAC dose and clinical outcomes [57]. In  
26 particular, NOAC underdosing has been shown to be associated with increased risk for adverse  
27 outcomes [21,56].

28  
29  
30  
31  
32  
33  
34  
35  
36  
37  
38  
39  
40  
41  
42  
43  
44  
45  
46  
47  
48  
49  
50  
51  
52  
53  
54  
55  
56  
57  
58  
59  
60  
These patterns of NOAC use contrast with the other patterns concomitantly observed in this study,  
such as the high level of concomitant prescription of antiplatelet agents and parenteral  
anticoagulants or, to a lesser extent, NOAC use in non-approved indications such as prosthetic heart  
valves that are both associated with an increased risk of bleeding [58–60].

### Strengths and limitations

This study is the first to report the improved trend in OAC coverage in French patients with AF over  
the last five years as well as the recent patterns of use of OAC therapy in new users, particularly  
including a nationwide assessment of the growing issue of NOAC underdosing, based on health data  
for more than 50 million beneficiaries. Moreover, all OAC prescriptions filled in the ambulatory

1  
2  
3 setting are captured in the databases and are reimbursed with no restriction of coverage: selection  
4 bias related to the access of patients to more expensive NOAC therapy is therefore not an issue with  
5 the use of French healthcare databases [22,61].  
6  
7

8 However, several limitations related to the nature of the data used should be underlined. First of all,  
9 it cannot be verified whether patients actually took the drugs for which they were reimbursed.  
10 Secondly, as the indication for treatment is not available in the databases, and despite the use of an  
11 algorithm to identify AF among outpatients in the French healthcare databases, identification of AF  
12 was mostly based on non-validated discharge and LTD diagnoses recorded in the databases.  
13 Moreover, it cannot be excluded that the increase in the identified number of patients with AF over  
14 the 2011-2016 period could be partially explained by changes in LTD legislation in 2011 (e.g.  
15 hypertension was removed from the list of LTD, while access to LTD was facilitated for patients with  
16 severe arrhythmia and valvular heart diseases) which could have helped identify patients with AF.  
17 Thirdly, identification of inappropriate underdosing at NOAC initiation was also indirectly assessed by  
18 using stroke and bleeding risk scores computed from claims data. Important medical data such as  
19 patient's weight, glomerular filtration rate and exact alcohol consumption are not available in the  
20 French healthcare databases, which may have led to underestimation of the HAS-BLED score and  
21 therefore to overestimation of the proportion of patients potentially underdosed at initiation. These  
22 missing clinical data may also explain the prescription of reduced dose NOAC at treatment initiation  
23 in clinical practice. Furthermore, the agreement between these empirical scores in patients with AF  
24 and the prescriber-assessed stroke and bleeding risk is a subject of discussion [62]. Consequently, the  
25 rate of inappropriate underdosing should be interpreted with caution and must be confirmed by  
26 further studies. However, NOAC misuse and underdosing have also been reported in a French  
27 prospective field study based on patients' medical charts [63]. Of note, as INR values were not  
28 available in the databases, underdosing with VKA therapy was not assessed in this study, but has  
29 been frequently reported and must not be overlooked [53,64]. In addition, as stated in the 2016 ESC  
30 guidelines [7], HAS-BLED score is not designed to evaluate prescription of NOAC type and dosage and  
31 no longer must be used for this purpose in clinical practice.  
32  
33

34  
35  
36  
37  
38  
39  
40  
41  
42  
43  
44  
45  
46  
47  
48 Finally, the results for NOAC and VKA new users are difficult to compare, as they were not adjusted  
49 for significant differences in baseline characteristics and this comparison was not the purpose of this  
50 study.  
51  
52  
53

## 54 55 56 **Conclusion**

57 OAC therapy use has modestly increased after the introduction of the NOACs for stroke prevention in  
58 patients with AF in France and NOAC therapy is now the preferred OAC therapy at initiation in older  
59  
60

1  
2  
3 patients at higher risk of stroke. However, results from this nationwide drug utilization study suggest  
4 the need for improvement in appropriate prescription of OAC therapy in these patients, especially  
5 regarding the use of concomitant interacting drugs and the choice of initial NOAC dose.  
6  
7  
8  
9  
10  
11  
12  
13  
14  
15  
16  
17  
18  
19  
20  
21  
22  
23  
24  
25  
26  
27  
28  
29  
30  
31  
32  
33  
34  
35  
36  
37  
38  
39  
40  
41  
42  
43  
44  
45  
46  
47  
48  
49  
50  
51  
52  
53  
54  
55  
56  
57  
58  
59  
60

For peer review only

### **Contributor ship statement**

GM, AP, CB and AN designed the study. All authors have contributed substantially to the interpretation of results. In addition: GM, AP and AN drafted the article; CB, JD and AN conducted the statistical analysis; GM, AP, AN, CB, JD, AW provided critical revision of the manuscript for important intellectual content. All authors had full access to all of the data (including statistical reports and tables) in the study and can take responsibility for the integrity of the data and the accuracy of the data analysis. All authors approved the version to be published.

### **Competing interests**

All authors have no conflict of interest.

### **Funding**

The authors received no funding.

### **Data sharing statement**

No additional data are available directly from the authors. Permanent access to the French healthcare databases is automatically granted to certain government agencies, public institutions and public service authorities. Temporary access for studies and research is possible upon request from the national health data institute (INDS). All databases used in this study only contained anonymous patient records.

### **Ethics approval**

This observational study based on the French healthcare databases was approved by the French Data Protection Agency (*Commission Nationale de l'Informatique et des Libertés*, Cnil) and did not require patient consents or ethics committee approval.

### **Acknowledgments**

The authors thank Dr Saul, medical translator, for assistance in writing the manuscript.

## References

- 1 Steinberg BA, Piccini JP. Anticoagulation in atrial fibrillation. *BMJ* 2014;**348**:g2116–g2116. doi:10.1136/bmj.g2116
- 2 Verheugt FWA, Granger CB. Oral anticoagulants for stroke prevention in atrial fibrillation: current status, special situations, and unmet needs. *The Lancet* 2015;**386**:303–10. doi:10.1016/S0140-6736(15)60245-8
- 3 Connolly SJ, Ezekowitz MD, Yusuf S, *et al.* Dabigatran versus Warfarin in Patients with Atrial Fibrillation. *N Engl J Med* 2009;**361**:1139–51. doi:10.1056/NEJMoa0905561
- 4 Patel MR, Mahaffey KW, Garg J, *et al.* Rivaroxaban versus Warfarin in Nonvalvular Atrial Fibrillation. *N Engl J Med* 2011;**365**:883–91. doi:10.1056/NEJMoa1009638
- 5 Granger CB, Alexander JH, McMurray JJV, *et al.* Apixaban versus Warfarin in Patients with Atrial Fibrillation. *N Engl J Med* 2011;**365**:981–92. doi:10.1056/NEJMoa1107039
- 6 Giugliano RP, Ruff CT, Braunwald E, *et al.* Edoxaban versus Warfarin in Patients with Atrial Fibrillation. *N Engl J Med* 2013;**369**:2093–104. doi:10.1056/NEJMoa1310907
- 7 Kirchhof P, Benussi S, Kotecha D, *et al.* 2016 ESC Guidelines for the management of atrial fibrillation developed in collaboration with EACTS. *Eur Heart J* 2016;**37**:2893–962. doi:10.1093/eurheartj/ehw210
- 8 Authors/Task Force Members, Camm AJ, Lip GYH, *et al.* 2012 focused update of the ESC Guidelines for the management of atrial fibrillation: An update of the 2010 ESC Guidelines for the management of atrial fibrillation \* Developed with the special contribution of the European Heart Rhythm Association. *Eur Heart J* 2012;**33**:2719–47. doi:10.1093/eurheartj/ehs253
- 9 Desai NR, Krumme AA, Schneeweiss S, *et al.* Patterns of Initiation of Oral Anticoagulants in Patients with Atrial Fibrillation— Quality and Cost Implications. *Am J Med* 2014;**127**:1075-1082.e1. doi:10.1016/j.amjmed.2014.05.013
- 10 Barnes GD, Lucas E, Alexander GC, *et al.* National Trends in Ambulatory Oral Anticoagulant Use. *Am J Med* 2015;**128**:1300-1305.e2. doi:10.1016/j.amjmed.2015.05.044
- 11 Haastrup S, Hellfritzschi M, Rasmussen L, *et al.* Use of Non-Vitamin K Antagonist Oral Anticoagulants 2008-2016: A Danish Nationwide Cohort Study. *Basic Clin Pharmacol Toxicol* Published Online First: 17 April 2018. doi:10.1111/bcpt.13024
- 12 Kjerpeseth LJ, Ellekjær H, Selmer R, *et al.* Trends in use of warfarin and direct oral anticoagulants in atrial fibrillation in Norway, 2010 to 2015. *Eur J Clin Pharmacol* 2017;**73**:1417–25. doi:10.1007/s00228-017-2296-1
- 13 Staerk L, Fosbøl EL, Gadsbøll K, *et al.* Non-vitamin K antagonist oral anticoagulation usage according to age among patients with atrial fibrillation: Temporal trends 2011–2015 in Denmark. *Sci Rep* 2016;**6**. doi:10.1038/srep31477
- 14 Huiart L, Ferdynus C, Renoux C, *et al.* Trends in initiation of direct oral anticoagulant therapies for atrial fibrillation in a national population-based cross-sectional study in the French health insurance databases. *BMJ Open* 2018;**8**:e018180. doi:10.1136/bmjopen-2017-018180

- 1  
2  
3 15 Urbaniak AM, Strøm BO, Krøntveit R, *et al.* Prescription Patterns of Non-Vitamin K Oral  
4 Anticoagulants Across Indications and Factors Associated with Their Increased Prescribing in  
5 Atrial Fibrillation Between 2012–2015: A Study from the Norwegian Prescription Database. *Drugs*  
6 *Aging* 2017;**34**:635–45. doi:10.1007/s40266-017-0476-4  
7
- 8 16 Broderick JP, Bonomo JB, Kissela BM, *et al.* Withdrawal of Antithrombotic Agents and Its Impact  
9 on Ischemic Stroke Occurrence. *Stroke* 2011;**42**:2509–14. doi:10.1161/STROKEAHA.110.611905  
10
- 11 17 Fang MC, Go AS, Chang Y, *et al.* Warfarin Discontinuation After Starting Warfarin for Atrial  
12 Fibrillation. *Circ Cardiovasc Qual Outcomes* 2010;**3**:624–31.  
13 doi:10.1161/CIRCOUTCOMES.110.937680  
14
- 15 18 Heidbuchel H, Verhamme P, Alings M, *et al.* Updated European Heart Rhythm Association  
16 practical guide on the use of non-vitamin-K antagonist anticoagulants in patients with non-  
17 valvular atrial fibrillation: Executive summary. *Eur Heart J* 2016;:ehw058.  
18 doi:10.1093/eurheartj/ehw058  
19
- 20 19 Dillinger J-G, Aleil B, Cheggour S, *et al.* Dosing issues with non-vitamin K antagonist oral  
21 anticoagulants for the treatment of non-valvular atrial fibrillation: Why we should not underdose  
22 our patients. *Arch Cardiovasc Dis* 2018;**111**:85–94. doi:10.1016/j.acvd.2017.04.008  
23
- 24 20 Marzec LN, Wang J, Shah ND, *et al.* Influence of Direct Oral Anticoagulants on Rates of Oral  
25 Anticoagulation for Atrial Fibrillation. *J Am Coll Cardiol* 2017;**69**:2475–84.  
26 doi:10.1016/j.jacc.2017.03.540  
27
- 28 21 Steinberg BA, Shrader P, Thomas L, *et al.* Off-Label Dosing of Non-Vitamin K Antagonist Oral  
29 Anticoagulants and Adverse Outcomes. *J Am Coll Cardiol* 2016;**68**:2597–604.  
30 doi:10.1016/j.jacc.2016.09.966  
31
- 32 22 Tuppin P, Rudant J, Constantinou P, *et al.* Value of a national administrative database to guide  
33 public decisions: From the système national d'information interrégimes de l'Assurance Maladie  
34 (SNIIRAM) to the système national des données de santé (SNDS) in France. *Rev Épidémiologie*  
35 *Santé Publique* 2017;**65**:S149–67. doi:10.1016/j.respe.2017.05.004  
36
- 37 23 Bezin J, Duong M, Lassalle R, *et al.* The national healthcare system claims databases in France,  
38 SNIIRAM and EGB: Powerful tools for pharmacoepidemiology. *Pharmacoepidemiol Drug Saf*  
39 Published Online First: 24 May 2017. doi:10.1002/pds.4233  
40
- 41 24 Maura G, Blotière P-O, Bouillon K, *et al.* Comparison of the Short-Term Risk of Bleeding and  
42 Arterial Thromboembolic Events in Nonvalvular Atrial Fibrillation Patients Newly Treated With  
43 Dabigatran or Rivaroxaban Versus Vitamin K Antagonists  
44 CLINICAL PERSPECTIVES: A French  
45 Nationwide Propensity-Matched Cohort Study. *Circulation* 2015;**132**:1252–60.  
46 doi:10.1161/CIRCULATIONAHA.115.015710  
47
- 48 25 Weill A, Dalichampt M, Raguideau F, *et al.* Low dose oestrogen combined oral contraception and  
49 risk of pulmonary embolism, stroke, and myocardial infarction in five million French women:  
50 cohort study. *BMJ* 2016;**353**:i2002.  
51
- 52 26 Neumann A, Maura G, Weill A, *et al.* Clinical Events After Discontinuation of  $\beta$ -Blockers in  
53 Patients Without Heart Failure Optimally Treated After Acute Myocardial Infarction: A Cohort  
54 Study on the French Healthcare Databases. *Circ Cardiovasc Qual Outcomes* 2018;**11**:e004356.  
55 doi:10.1161/CIRCOUTCOMES.117.004356  
56  
57  
58  
59  
60

- 1  
2  
3 27 Billionnet C, Alla F, Bérigaud É, *et al.* Identifying atrial fibrillation in outpatients initiating oral  
4 anticoagulants based on medico-administrative data: results from the French national healthcare  
5 databases: Identification of Atrial Fibrillation in Claims. *Pharmacoepidemiol Drug Saf*  
6 2017;**26**:535–43. doi:10.1002/pds.4192  
7  
8  
9 28 Haute autorité de santé. Guide parcours de soins Fibrillation atriale. 2014. [https://www.has-](https://www.has-sante.fr/portail/jcms/c_1741768/fr/guide-parcours-de-soins-fibrillation-atriale)  
10 [sante.fr/portail/jcms/c\\_1741768/fr/guide-parcours-de-soins-fibrillation-atriale](https://www.has-sante.fr/portail/jcms/c_1741768/fr/guide-parcours-de-soins-fibrillation-atriale) (accessed 18 Jul  
11 2018).  
12  
13 29 Rey G, Jouglu E, Fouillet A, *et al.* Ecological association between a deprivation index and  
14 mortality in France over the period 1997 – 2001: variations with spatial scale, degree of  
15 urbanicity, age, gender and cause of death. *BMC Public Health* 2009;**9**:33. doi:10.1186/1471-  
16 2458-9-33  
17  
18 30 Olesen JB, Lip GYH, Hansen ML, *et al.* Validation of risk stratification schemes for predicting  
19 stroke and thromboembolism in patients with atrial fibrillation: nationwide cohort study. *BMJ*  
20 2011;**342**:d124–d124. doi:10.1136/bmj.d124  
21  
22 31 Pisters R, Lane DA, Nieuwlaat R, *et al.* A novel user-friendly score (HAS-BLED) to assess 1-year risk  
23 of major bleeding in patients with atrial fibrillation: the Euro Heart Survey. *Chest* 2010;**138**:1093–  
24 100. doi:10.1378/chest.10-0134  
25  
26 32 Renoux C, Vahey S, Dell’Aniello S, *et al.* Association of Selective Serotonin Reuptake Inhibitors  
27 With the Risk for Spontaneous Intracranial Hemorrhage. *JAMA Neurol* 2017;**74**:173.  
28 doi:10.1001/jamaneurol.2016.4529  
29  
30 33 Cowan JC, Wu J, Hall M, *et al.* A 10 year study of hospitalized atrial fibrillation-related stroke in  
31 England and its association with uptake of oral anticoagulation. *Eur Heart J* Published Online  
32 First: 5 July 2018. doi:10.1093/eurheartj/ehy411  
33  
34 34 Steinberg BA, Gao H, Shrader P, *et al.* International trends in clinical characteristics and oral  
35 anticoagulation treatment for patients with atrial fibrillation: Results from the GARFIELD-AF,  
36 ORBIT-AF I, and ORBIT-AF II registries. *Am Heart J* 2017;**194**:132–40.  
37 doi:10.1016/j.ahj.2017.08.011  
38  
39 35 Brown JD, Shewale AR, Dherange P, *et al.* A Comparison of Oral Anticoagulant Use for Atrial  
40 Fibrillation in the Pre- and Post-DOAC Eras. *Drugs Aging* 2016;**33**:427–36. doi:10.1007/s40266-  
41 016-0369-y  
42  
43 36 Apenteng PN, Gao H, Hobbs FR, *et al.* Temporal trends in antithrombotic treatment of real-world  
44 UK patients with newly diagnosed atrial fibrillation: findings from the GARFIELD-AF registry. *BMJ*  
45 *Open* 2018;**8**:e018905. doi:10.1136/bmjopen-2017-018905  
46  
47 37 Alalwan AA, Voils SA, Hartzema AG. Trends in utilization of warfarin and direct oral  
48 anticoagulants in older adult patients with atrial fibrillation. *Am J Health Syst Pharm*  
49 2017;**74**:1237–44. doi:10.2146/ajhp160756  
50  
51 38 Olesen JB, Sorensen R, Hansen ML, *et al.* Non-vitamin K antagonist oral anticoagulation agents in  
52 anticoagulant naive atrial fibrillation patients: Danish nationwide descriptive data 2011-2013.  
53 *Europace* 2015;**17**:187–93. doi:10.1093/europace/euu225  
54  
55  
56  
57  
58  
59  
60



- 1  
2  
3 39 Lacoïn L, Lumley M, Ridha E, *et al.* Evolving landscape of stroke prevention in atrial fibrillation  
4 within the UK between 2012 and 2016: a cross-sectional analysis study using CPRD. *BMJ Open*  
5 2017;**7**:e015363. doi:10.1136/bmjopen-2016-015363  
6  
7 40 Averlant L, Ficheur G, Ferret L, *et al.* Underuse of Oral Anticoagulants and Inappropriate  
8 Prescription of Antiplatelet Therapy in Older Inpatients with Atrial Fibrillation. *Drugs Aging*  
9 2017;**34**:701–10. doi:10.1007/s40266-017-0477-3  
10  
11 41 Alamneh EA, Chalmers L, Bereznicki LR. Suboptimal Use of Oral Anticoagulants in Atrial  
12 Fibrillation: Has the Introduction of Direct Oral Anticoagulants Improved Prescribing Practices?  
13 *Am J Cardiovasc Drugs* 2016;**16**:183–200. doi:10.1007/s40256-016-0161-8  
14  
15 42 Douros A, Renoux C, Coulombe J, *et al.* Patterns of long-term use of non-vitamin K antagonist  
16 oral anticoagulants for non-valvular atrial fibrillation: Quebec observational study.  
17 *Pharmacoepidemiol Drug Saf* 2017;**26**:1546–54. doi:10.1002/pds.4333  
18  
19 43 Komen J, Forslund T, Hjemdahl P, *et al.* Factors associated with antithrombotic treatment  
20 decisions for stroke prevention in atrial fibrillation in the Stockholm region after the introduction  
21 of NOACs. *Eur J Clin Pharmacol* 2017;**73**:1315–22. doi:10.1007/s00228-017-2289-0  
22  
23 44 Patel PA, Zhao X, Fonarow GC, *et al.* Novel Oral Anticoagulant Use Among Patients With Atrial  
24 Fibrillation Hospitalized With Ischemic Stroke or Transient Ischemic Attack. *Circ Cardiovasc Qual*  
25 *Outcomes* 2015;**8**:383–92. doi:10.1161/CIRCOUTCOMES.114.000907  
26  
27 45 Lauffenburger JC, Farley JF, Gehi AK, *et al.* Factors Driving Anticoagulant Selection in Patients  
28 With Atrial Fibrillation in the United States. *Am J Cardiol* 2015;**115**:1095–101.  
29 doi:10.1016/j.amjcard.2015.01.539  
30  
31 46 Boriani G, Proietti M, Laroche C, *et al.* Contemporary stroke prevention strategies in 11 096  
32 European patients with atrial fibrillation: a report from the EURObservational Research  
33 Programme on Atrial Fibrillation (EORP-AF) Long-Term General Registry. *Eur Eur Pacing Arrhythm*  
34 *Card Electrophysiol J Work Groups Card Pacing Arrhythm Card Cell Electrophysiol Eur Soc Cardiol*  
35 2018;**20**:747–57. doi:10.1093/europace/eux301  
36  
37 47 Maura G, Billionnet C, Alla F, *et al.* Comparison of Treatment Persistence with Dabigatran or  
38 Rivaroxaban versus Vitamin K Antagonist Oral Anticoagulants in Atrial Fibrillation Patients: A  
39 Competing Risk Analysis in the French National Health Care Databases. *Pharmacother J Hum*  
40 *Pharmacol Drug Ther* 2018;**38**:6–18. doi:10.1002/phar.2046  
41  
42 48 Ruff CT, Giugliano RP, Braunwald E, *et al.* Comparison of the efficacy and safety of new oral  
43 anticoagulants with warfarin in patients with atrial fibrillation: a meta-analysis of randomised  
44 trials. *The Lancet* 2014;**383**:955–62. doi:10.1016/S0140-6736(13)62343-0  
45  
46 49 Sorensen HT, Riis AH, Lash TL, *et al.* Statin Use and Risk of Amyotrophic Lateral Sclerosis and  
47 Other Motor Neuron Disorders. *Circ Cardiovasc Qual Outcomes* 2010;**3**:413–7.  
48 doi:10.1161/CIRCOUTCOMES.110.936278  
49  
50 50 Başaran Ö, Dogan V, Beton O, *et al.* Suboptimal use of non-vitamin K antagonist oral  
51 anticoagulants: Results from the RAMSES study. *Medicine (Baltimore)* 2016;**95**:e4672.  
52 doi:10.1097/MD.0000000000004672  
53  
54 51 Ono T, Kohsaka S, Takatsuki S, *et al.* Inconsistent Dosing of Non-Vitamin K Oral Anticoagulants. *J*  
55 *Am Coll Cardiol* 2017;**70**:118. doi:10.1016/j.jacc.2017.03.609  
56  
57  
58  
59  
60

- 1  
2  
3 52 Hsu JC, Akao M, Abe M, *et al.* International Collaborative Partnership for the Study of Atrial  
4 Fibrillation (INTERAF): Rationale, Design, and Initial Descriptives. *J Am Heart Assoc*  
5 2016;**5**:e004037. doi:10.1161/JAHA.116.004037  
6
- 7 53 Okumura Y, Yokoyama K, Matsumoto N, *et al.* Current use of direct oral anticoagulants for atrial  
8 fibrillation in Japan: Findings from the SAKURA AF Registry. *J Arrhythmia* 2017;**33**:289–96.  
9 doi:10.1016/j.joa.2016.11.003  
10
- 11 54 Steinberg BA, Shrader P, Pieper K, *et al.* Frequency and Outcomes of Reduced Dose Non–Vitamin  
12 K Antagonist Anticoagulants: Results From ORBIT-AF II (The Outcomes Registry for Better  
13 Informed Treatment of Atrial Fibrillation II). *J Am Heart Assoc* 2018;**7**:e007633.  
14 doi:10.1161/JAHA.117.007633  
15
- 16 55 Pisters R, van Vugt SPG, Brouwer MA, *et al.* Real-life use of Rivaroxaban in the Netherlands: data  
17 from the Xarelto for Prevention of Stroke in Patients with Atrial Fibrillation (XANTUS) registry.  
18 *Neth Heart J* 2017;**25**:551–8. doi:10.1007/s12471-017-1009-9  
19
- 20 56 Yao X, Shah ND, Sangaralingham LR, *et al.* Non–Vitamin K Antagonist Oral Anticoagulant Dosing  
21 in Patients With Atrial Fibrillation and Renal Dysfunction. *J Am Coll Cardiol* 2017;**69**:2779–90.  
22 doi:10.1016/j.jacc.2017.03.600  
23
- 24 57 Reilly PA, Lehr T, Haertter S, *et al.* The Effect of Dabigatran Plasma Concentrations and Patient  
25 Characteristics on the Frequency of Ischemic Stroke and Major Bleeding in Atrial Fibrillation  
26 Patients. *J Am Coll Cardiol* 2014;**63**:321–8. doi:10.1016/j.jacc.2013.07.104  
27
- 28 58 Bouillon K, Bertrand M, Boudali L, *et al.* Short-Term Risk of Bleeding During Heparin Bridging at  
29 Initiation of Vitamin K Antagonist Therapy in More Than 90 000 Patients With Nonvalvular Atrial  
30 Fibrillation Managed in Outpatient Care. *J Am Heart Assoc* 2016;**5**:e004065.  
31 doi:10.1161/JAHA.116.004065  
32
- 33 59 Chang S-H, Chou I-J, Yeh Y-H, *et al.* Association Between Use of Non–Vitamin K Oral  
34 Anticoagulants With and Without Concurrent Medications and Risk of Major Bleeding in  
35 Nonvalvular Atrial Fibrillation. *JAMA* 2017;**318**:1250. doi:10.1001/jama.2017.13883  
36
- 37 60 Van de Werf F, Brueckmann M, Connolly SJ, *et al.* A comparison of dabigatran etexilate with  
38 warfarin in patients with mechanical heart valves: The Randomized, phase II study to Evaluate  
39 the sAFety and pharmacokinetics of oral dabiGatran etexilate in patients after heart valve  
40 replacemeNt (RE-ALIGN). *Am Heart J* 2012;**163**:931-937.e1. doi:10.1016/j.ahj.2012.03.011  
41
- 42 61 Steffen M. Universalism, Responsiveness, Sustainability — Regulating the French Health Care  
43 System. *N Engl J Med* 2016;**374**:401–5. doi:10.1056/NEJMp1504547  
44
- 45 62 Steinberg BA, Kim S, Thomas L, *et al.* Lack of Concordance Between Empirical Scores and  
46 Physician Assessments of Stroke and Bleeding Risk in Atrial Fibrillation: Results From the  
47 Outcomes Registry for Better Informed Treatment of Atrial Fibrillation (ORBIT-AF) Registry.  
48 *Circulation* 2014;**129**:2005–12. doi:10.1161/CIRCULATIONAHA.114.008643  
49
- 50 63 Lafon T, Vallejo C, Hadj M, *et al.* Mésusage et iatrogénie des anticoagulants oraux directs (AOD) :  
51 étude observationnelle dans le service des urgences du CHU de Limoges. *Thérapie* Published  
52 Online First: July 2017. doi:10.1016/j.therap.2017.05.004  
53
- 54 64 Pokorney SD, Simon DN, Thomas L, *et al.* Stability of International Normalized Ratios in Patients  
55 Taking Long-term Warfarin Therapy. *JAMA* 2016;**316**:661–3. doi:10.1001/jama.2016.9356  
56  
57  
58  
59  
60

1  
2  
3  
4  
5  
6  
7  
8  
9  
10  
11  
12  
13  
14  
15  
16  
17  
18  
19  
20  
21  
22  
23  
24  
25  
26  
27  
28  
29  
30  
31  
32  
33  
34  
35  
36  
37  
38  
39  
40  
41  
42  
43  
44  
45  
46  
47  
48  
49  
50  
51  
52  
53  
54  
55  
56  
57  
58  
59  
60

For peer review only

## Figure titles and legends

**Figure 1.** Time trends in the use of oral antithrombotic therapy between 2011 and 2016 in patients with atrial fibrillation in France

Abbreviations: AF: atrial fibrillation; OAC: oral anticoagulant; VKA: vitamin K antagonist; NOAC: Non vitamin K antagonist oral anticoagulant

Legend: For Figures 1.b., 1.d and 1.e., estimates from all AF patients already presented in figure 1.a. are indicated by dashed lines for the purposes of comparison.

**Figure 2.** Patient flow chart.

Abbreviations: OAC: oral anticoagulant; NOAC: Non-vitamin K antagonist oral anticoagulant; VKA: vitamin K antagonist; DVT/PE: deep vein thrombosis/pulmonary embolism; AF: atrial fibrillation

**Figure 3.** Potential NOAC underdosing in new users with AF

Abbreviations: NOAC: Non-vitamin K antagonist oral anticoagulant; AF: atrial fibrillation

**Table 1. Baseline characteristics of anticoagulant-naive patients with atrial fibrillation initiating oral anticoagulants in 2015-2016**

| Characteristics (N; %*)                                            | NOAC                   |                          |                       |                          | VKA<br>N= 65,010 |
|--------------------------------------------------------------------|------------------------|--------------------------|-----------------------|--------------------------|------------------|
|                                                                    | Dabigatran<br>N= 9,085 | Rivaroxaban<br>N= 54,456 | Apixaban<br>N= 64,300 | Total NOAC<br>N= 127,841 |                  |
| <b>NOAC: reduced doses</b>                                         | 5,652 (62.2)           | 19,429 (35.7)            | 26,003 (40.4)         | 51,084 (40.0)            | NA               |
| <b>Female sex</b>                                                  | 4,546 (50.0)           | 26,147 (48.0)            | 33,375 (51.9)         | 64,068 (50.1)            | 33,865 (52.1)    |
| <b>Age (years), mean (SD)</b>                                      | 74.1 (11.6)            | 72.8 (11.9)              | 75.3 (11.3)           | 74.1 (11.6)              | 78.0 (11.3)      |
| 18-54                                                              | 548 (6.0)              | 4,007 (7.4)              | 3,172 (4.9)           | 7,727 (6.0)              | 2,361 (3.6)      |
| 55-64                                                              | 1,117 (12.3)           | 7,651 (14.0)             | 7,117 (11.1)          | 15,885 (12.4)            | 5,680 (8.7)      |
| 65-74                                                              | 2,514 (27.7)           | 16,057 (29.5)            | 16,645 (25.9)         | 35,216 (27.5)            | 12,969 (19.9)    |
| 75-79                                                              | 1,554 (17.1)           | 9,053 (16.6)             | 10,692 (16.6)         | 21,299 (16.7)            | 9,587 (14.7)     |
| ≥80                                                                | 3,352 (36.9)           | 17,688 (32.5)            | 26,674 (41.5)         | 47,714 (37.3)            | 34,413 (52.9)    |
| ≥90                                                                | 493 (5.4)              | 2,559 (4.7)              | 4,654 (7.2)           | 7,706 (6.0)              | 8,399 (12.9)     |
| <b>Deprivation index</b>                                           |                        |                          |                       |                          |                  |
| Quintile 1 (least deprived)                                        | 1,394 (15.3)           | 10,265 (18.9)            | 11,266 (17.5)         | 22,925 (17.9)            | 10,263 (15.8)    |
| Quintile 2                                                         | 1,586 (17.5)           | 10,678 (19.6)            | 12,496 (19.4)         | 24,760 (19.4)            | 11,884 (18.3)    |
| Quintile 3                                                         | 1,780 (19.6)           | 10,701 (19.7)            | 12,799 (19.9)         | 25,280 (19.8)            | 12,811 (19.7)    |
| Quintile 4                                                         | 1,917 (21.1)           | 10,794 (19.8)            | 13,142 (20.4)         | 25,853 (20.2)            | 14,272 (22.0)    |
| Quintile 5 (most deprived))                                        | 2,113 (23.3)           | 11,172 (20.5)            | 13,825 (21.5)         | 27,110 (21.2)            | 14,699 (22.6)    |
| Overseas departments                                               | 295 (3.2)              | 846 (1.6)                | 772 (1.2)             | 1,913 (1.5)              | 1,081 (1.7)      |
| <b>First prescriber's specialty</b>                                |                        |                          |                       |                          |                  |
| Hospital practitioner                                              | 3,720 (40.9)           | 22,905 (42.1)            | 29,316 (45.6)         | 55,941 (43.8)            | 39,083 (60.1)    |
| General practitioner                                               | 2,062 (22.7)           | 11,145 (20.5)            | 11,590 (18.0)         | 24,797 (19.4)            | 15,539 (23.9)    |
| Private cardiologist                                               | 3,093 (34.0)           | 18,978 (34.9)            | 21,843 (34.0)         | 43,914 (34.4)            | 8,511 (13.1)     |
| Private orthopaedic surgeon                                        | 16 (0.2)               | 100 (0.2)                | 95 (0.1)              | 211 (0.2)                | 73 (0.1)         |
| Other private specialist                                           | 168 (1.8)              | 1,149 (2.1)              | 1,276 (2.0)           | 2,593 (2.0)              | 1,583 (2.4)      |
| <b>CHA<sub>2</sub>DS<sub>2</sub>-VASc score<sup>†</sup></b>        |                        |                          |                       |                          |                  |
| Mean score (SD)                                                    | 3.7 (1.6)              | 3.5 (1.6)                | 3.9 (1.6)             | 3.7 (1.6)                | 4.5 (1.6)        |
| 0                                                                  | 183 (2.0)              | 1,294 (2.4)              | 847 (1.3)             | 2,324 (1.8)              | 309 (0.5)        |
| 1                                                                  | 635 (7.0)              | 4,854 (8.9)              | 3,637 (5.7)           | 9,126 (7.1)              | 1,607 (2.5)      |
| ≥ 2                                                                | 8,267 (91.0)           | 48,308 (88.7)            | 59,816 (93.0)         | 116,391 (90.1)           | 63,094 (97.0)    |
| C (Heart failure)                                                  | 2,849 (31.4)           | 17,805 (32.7)            | 23,548 (36.6)         | 44,202 (34.6)            | 32,727 (50.3)    |
| H (antihypertensive drugs)                                         | 7,547 (83.1)           | 44,260 (81.3)            | 54,596 (84.9)         | 106,403 (83.2)           | 59,139 (91.0)    |
| D(iabetes)                                                         | 1,959 (21.6)           | 11,279 (20.7)            | 14,087 (21.9)         | 27,325 (21.4)            | 18,806 (28.9)    |
| S(troke: ATE)                                                      | 1,207 (13.3)           | 4,930 (9.1)              | 8,448 (13.1)          | 14,585 (11.4)            | 10,638 (16.4)    |
| V(ascular diseases)                                                | 2,242 (24.7)           | 13,924 (25.6)            | 18,766 (29.2)         | 34,932 (27.3)            | 28,894 (44.4)    |
| <b>Age≥75 and arterial thromboembolic events<sup>†</sup></b>       | 769 (8.5)              | 3,126 (5.7)              | 5,608 (8.7)           | 9,503 (7.4)              | 7,762 (11.9)     |
| <b>Age&lt;65 and no arterial thromboembolic events<sup>†</sup></b> | 1,510 (16.6)           | 11,074 (20.3)            | 9,396 (14.6)          | 21,980 (17.2)            | 7,035 (10.8)     |

Table 1. (continued)

| Characteristics (N; %)                 | NOAC                   |                          |                       |                          | VKA<br>N= 65,010 |
|----------------------------------------|------------------------|--------------------------|-----------------------|--------------------------|------------------|
|                                        | Dabigatran<br>N= 9,085 | Rivaroxaban<br>N= 54,456 | Apixaban<br>N= 64,300 | Total NOAC<br>N= 127,841 |                  |
| <b>HAS-BLED score<sup>†</sup></b>      |                        |                          |                       |                          |                  |
| Mean score (SD)                        | 2.0 (0.9)              | 1.9 (0.9)                | 2.1 (0.9)             | 2.0 (0.9)                | 2.7 (1.0)        |
| ≥ 3                                    | 2,169 (23.9)           | 11,388 (20.9)            | 16,834 (26.2)         | 30,391 (23.8)            | 36,417 (56.0)    |
| A(bnormal)                             |                        |                          |                       |                          |                  |
| Renal function                         | 345 (3.8)              | 2,426 (4.5)              | 3,822 (5.9)           | 6,593 (5.2)              | 14,260 (21.9)    |
| Liver function                         | 169 (1.9)              | 967 (1.8)                | 1,106 (1.7)           | 2,242 (1.8)              | 2,372 (3.6)      |
| B(leeding)                             |                        |                          |                       |                          |                  |
| Predisposition                         | 182 (2.0)              | 1,161 (2.1)              | 1,605 (2.5)           | 2,948 (2.3)              | 5,873 (9.0)      |
| Major bleeding                         | 692 (7.6)              | 3,729 (6.8)              | 5,134 (8)             | 9,555 (7.5)              | 9,348 (14.4)     |
| D(rug/alcohol)                         |                        |                          |                       |                          |                  |
| Alcohol abuse <sup>‡</sup>             | 272 (3.0)              | 1,698 (3.1)              | 1,730 (2.7)           | 3,700 (2.9)              | 2,923 (4.5)      |
| Drug-drug interactions                 | 947 (10.4)             | 5,838 (10.7)             | 7,570 (11.8)          | 14,355 (11.2)            | 23,451 (36.1)    |
| Parenteral anticoagulant (heparin)     | 64 (0.7)               | 331 (0.6)                | 361 (0.6)             | 756 (0.6)                | 9,824 (15.1)     |
| Antiplatelet drugs                     | 826 (9.1)              | 5,225 (9.6)              | 6,951 (10.8)          | 13,002 (10.2)            | 15,433 (23.7)    |
| NSAIDs                                 | 72 (0.8)               | 365 (0.7)                | 344 (0.5)             | 781 (0.6)                | 212 (0.3)        |
| <b>Other comorbidities<sup>†</sup></b> |                        |                          |                       |                          |                  |
| Ischaemic heart disease                | 1,821 (20.0)           | 11,321 (20.8)            | 15,439 (24.0)         | 28,581 (22.4)            | 23,657 (36.4)    |
| Frailty (proxies)                      | 1,666 (18.3)           | 8,971 (16.5)             | 12,730 (19.8)         | 23,367 (18.3)            | 24,175 (37.2)    |
| Dementia or Parkinson's disease        | 524 (5.8)              | 3,204 (5.9)              | 4,125 (6.4)           | 7,853 (6.1)              | 7,437 (11.4)     |
| Psychiatric disorders                  | 1,722 (19.0)           | 10,593 (19.5)            | 12,844 (20.0)         | 25,159 (19.7)            | 16,598 (25.5)    |
| Smoking <sup>‡</sup>                   | 1,024 (11.3)           | 6,481 (11.9)             | 7,442 (11.6)          | 14,947 (11.7)            | 11,434 (17.6)    |
| <b>Comedications<sup>§</sup></b>       |                        |                          |                       |                          |                  |
| Antiarrhythmics or cardiac glycosides  | 5,996 (66.0)           | 35,761 (65.7)            | 41,031 (63.8)         | 82,788 (64.8)            | 35,600 (54.8)    |
| Lipid-lowering agents                  | 3,913 (43.1)           | 22,250 (40.9)            | 28,812 (44.8)         | 54,975 (43.0)            | 31,903 (49.1)    |
| Oral corticosteroids                   | 1,105 (12.2)           | 6,964 (12.8)             | 8,079 (12.6)          | 16,148 (12.6)            | 8,967 (13.8)     |
| Antiulcer agents                       | 4,295 (47.3)           | 24,842 (45.6)            | 31,469 (48.9)         | 60,606 (47.4)            | 39,842 (61.3)    |
| Polymedication (≥5 ATC classes)        | 3,750 (41.3)           | 21,725 (39.9)            | 28,196 (43.9)         | 53,671 (42.0)            | 45,153 (69.5)    |
| Polymedication (≥10 ATC classes)       | 738 (8.1)              | 4,653 (8.5)              | 6,246 (9.7)           | 11,637 (9.1)             | 14,947 (23.0)    |

NOAC: Non-vitamin K antagonist oral anticoagulant; VKA: vitamin K antagonist; SD: standard deviation; ATE: arterial thromboembolic events (ischaemic stroke, arterial systemic embolism or transient ischaemic attack); NSAIDs: non-steroidal anti-inflammatory drugs

\* Unless otherwise stated

† Comorbidities were defined using a rolling 1-year period following the initiation of OAC therapy

‡ Smoking or alcohol data: measured by using proxies such as reimbursements for specific therapy or hospitalizations related to smoking or alcohol consumption/diseases

§ Comorbidities were defined using a rolling 4-month period preceding the initiation of OAC therapy

**Table 2. Potential inappropriate use of NOAC therapy in oral anticoagulant-naïve patients with atrial fibrillation in 2015-2016**

| Characteristics (N; %)                                                             | NOAC                   |                          |                       |                          | VKA<br>N= 65,010     |
|------------------------------------------------------------------------------------|------------------------|--------------------------|-----------------------|--------------------------|----------------------|
|                                                                                    | Dabigatran<br>N= 9,085 | Rivaroxaban<br>N= 54,456 | Apixaban<br>N= 64,300 | Total NOAC<br>N= 127,841 |                      |
| <b>Contraindications or non-approved indication/dose</b>                           | <b>1,457 (16.0)</b>    | <b>8,614 (15.8)</b>      | <b>9,542 (14.8)</b>   | <b>19,613 (15.3)</b>     | <b>NA</b>            |
| Any valvular heart disease                                                         | 649 (7.1)              | 4,146 (7.6)              | 6,122 (9.5)           | 10,917 (8.5)             | 16,461 (25.3)        |
| Prosthetic heart valve (mechanical or bioprosthetic valves)                        | 106 (1.2)              | 665 (1.2)                | 1,096 (1.7)           | 1,867 (1.5)              | 6,726 (10.3)         |
| Recently hospitalized for coagulopathy, purpura and other haemorrhagic conditions* | 90 (1.0)               | 479 (0.9)                | 596 (0.9)             | 1,165 (0.9)              | 2,142 (3.3)          |
| Liver fibrosis and cirrhosis*                                                      | 50 (0.6)               | 282 (0.5)                | 367 (0.6)             | 699 (0.5)                | 1,174 (1.8)          |
| Recent gastrointestinal ulceration or intracranial haemorrhage†                    | 40 (0.4)               | 120 (0.2)                | 248 (0.4)             | 408 (0.3)                | 350 (0.5)            |
| Recently or currently treated cancer*                                              | 417 (4.6)              | 2,531 (4.6)              | 2,898 (4.5)           | 5,846 (4.6)              | 4,252 (6.5)          |
| Reduced-dose NOAC not approved for stroke prevention in AF patients in Europe      | 357 (3.9)              | 1,844 (3.4)              | NA                    | 2,201 (3.5)              | NA                   |
| <b>Inappropriate use during follow-up‡</b>                                         |                        |                          |                       |                          |                      |
| No monitoring of renal function at initiation                                      | 637 (16.8)             | 3804 (15.5)              | 3642 (14.5)           | 8083 (15.1)              | 5401 (17.0)          |
| No monitoring of renal function in the year post-initiation                        | 378 (10.0)             | 2,347 (9.6)              | 2,138 (8.5)           | 4,863 (9.1)              | 2,984 (9.4)          |
| Non-persistence patterns, N (%)                                                    |                        |                          |                       |                          |                      |
| One reimbursement only                                                             | 605 (15.9)             | 2,666 (10.9)             | 1,771 (7.1)           | 5,042 (9.4)              | 2,426 (7.6)          |
| One-year treatment discontinuation rates§                                          | 984 (25.9)             | 6210 (25.4)              | 4524 (18.0)           | 11,718 (21.9)            | 8399 (26.4)          |
| <b>Concomitant use of drug increasing the risk of bleeding¶</b>                    | <b>2,639 (29.3)</b>    | <b>15,797 (29.3)</b>     | <b>18,556 (29.2)</b>  | <b>36,992 (29.3)</b>     | <b>33,025 (52.3)</b> |
| Antiplatelet agents or parenteral anticoagulants                                   | 1,728 (19.2)           | 10,386 (19.3)            | 12,382 (19.5)         | 24,496 (19.4)            | 28,112 (44.5)        |
| Parenteral anticoagulants                                                          | 287 (3.2)              | 1,577 (2.9)              | 1,520 (2.4)           | 3,384 (2.7)              | 12,078 (19.1)        |
| Antiplatelet agents                                                                | 1,490 (16.6)           | 9,179 (17.0)             | 11,170 (17.6)         | 21,839 (17.3)            | 19,710 (31.2)        |
| Aspirin                                                                            | 1,336 (14.8)           | 8,215 (15.2)             | 10,026 (15.8)         | 19,577 (15.5)            | 17,770 (28.1)        |
| NSAIDs                                                                             | 375 (4.2)              | 2,111 (3.9)              | 2,017 (3.2)           | 4,503 (3.6)              | 1,030 (1.6)          |
| SSRIs and SSNRIs                                                                   | 836 (9.3)              | 4,852 (9.0)              | 5,880 (9.2)           | 11,568 (9.1)             | 7,317 (11.6)         |

NOAC: Non-vitamin K antagonist oral anticoagulant; VKA: vitamin K antagonist; AF: atrial fibrillation; NA: not applicable; NSAIDs: non-steroidal anti-inflammatory drugs; SSRIs: selective serotonin reuptake inhibitors and SSNRIs: selective serotonin-norepinephrine reuptake inhibitors

\* Comorbidities identified using hospitalization and/or LTD data, and/or specific procedures during a rolling 1-year period preceding the initiation of OAC therapy

† Comorbidities identified using hospitalization data during a rolling 6-week period preceding the initiation of OAC therapy

‡ Data on patients with at least a one year of follow-up i.e. patients initiating OAC in 2015 after excluding patients who died and those hospitalized for 3 months or longer (N= 3,796; 24,483; 25,118; 53,397 and 31,777 for dabigatran-, rivaroxaban, apixaban, total NOAC- and total VKA new users, respectively); period considered (unless otherwise stated): rolling 1-year period following the initiation of OAC therapy (index date included)

§ One-year crude discontinuation rate for patients initiating OAC in 2015 who died and those hospitalized for 3 months or longer, defined as prolonged treatment discontinuation i.e. 90-day gap with no medication coverage after the 30-day coverage period of a refill

¶ Data for new users still alive after a 45-day period following the index date (N= 9,001; 53,885; 63,578; 126,464 and 63,180 for dabigatran-, rivaroxaban, apixaban, total NOAC- and total VKA new users , respectively); period considered: rolling 6-week period following the initiation of OAC therapy (index date included)



Figure 1

253x190mm (300 x 300 DPI)



1  
2  
3  
4  
5  
6  
7  
8  
9  
10  
11  
12  
13  
14  
15  
16  
17  
18  
19  
20  
21  
22  
23  
24  
25  
26  
27  
28  
29  
30  
31  
32  
33  
34  
35  
36  
37  
38  
39  
40  
41  
42  
43  
44  
45  
46  
47  
48  
49  
50  
51  
52  
53  
54  
55  
56  
57  
58  
59  
60

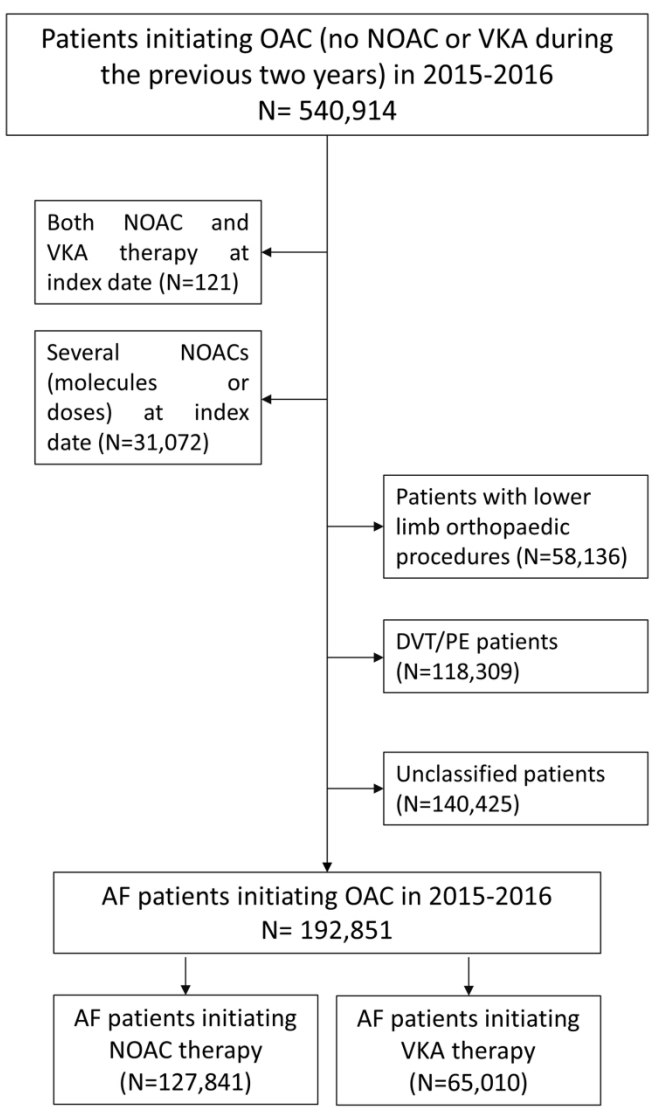

Figure 2

190x253mm (300 x 300 DPI)

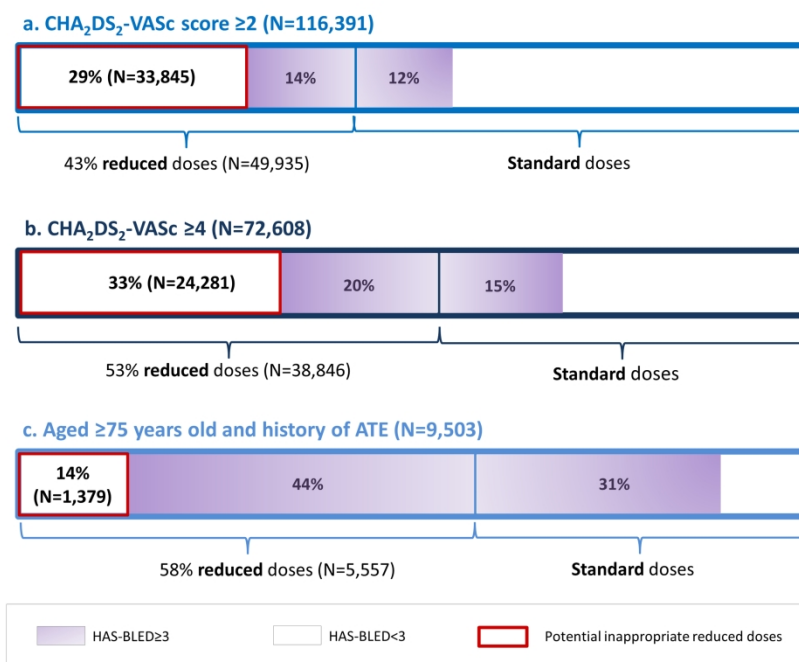

Figure 3

253x190mm (300 x 300 DPI)

## Supplementary Materials

Supplementary Table 1. Definitions used to identify comorbid conditions and comedications in the French healthcare databases.

Supplementary Table 2. Age- and sex-adjusted association between baseline characteristics and the choice of NOAC therapy compared to VKA therapy in OAC new users.

Supplementary Table 3. Comparison of selected baseline characteristics of DOAC new users with AF at risk of stroke according to level of HAS-BLED score and type of DOAC dose.

For peer review only

**Supplementary Table 1. Definitions used to identify comorbid conditions and comedications in the SNIIRAM-PMSI databases.**

| Covariates*                                                                               | Hospital discharge diagnoses†                                                                                                                               | LTD diagnoses†          | Specific procedures or drug reimbursements                                                                                                                                            |
|-------------------------------------------------------------------------------------------|-------------------------------------------------------------------------------------------------------------------------------------------------------------|-------------------------|---------------------------------------------------------------------------------------------------------------------------------------------------------------------------------------|
| <b>AF definition (Patterns of use of DOAC therapy in new users with AF)</b>               |                                                                                                                                                             |                         |                                                                                                                                                                                       |
| Nonvalvular atrial fibrillation                                                           | I48                                                                                                                                                         | I48                     | Radiofrequency ablation, cardioversion                                                                                                                                                |
| Lower limb orthopaedic procedures                                                         |                                                                                                                                                             |                         | Lower limb orthopaedic surgery or procedures                                                                                                                                          |
| History of valvular heart disease/Prosthetic heart valve                                  | I05-I09, I33-I39/ Z95.2, Z95.3 ou Z95.4                                                                                                                     |                         | Heart valve surgery                                                                                                                                                                   |
| Deep vein thrombosis/pulmonary embolism                                                   | I26, I80 (except I80.0), I81, I82                                                                                                                           | I26, I80-I82            | Lower limb venous ultrasonography, pulmonary/lower limb angiography, ventilation/perfusion scan                                                                                       |
| <b>CHA<sub>2</sub>DS<sub>2</sub>-VASc and HAS-BLED scores</b>                             |                                                                                                                                                             |                         |                                                                                                                                                                                       |
| Heart failure                                                                             | I50 or I11.0, I13.0, I13.2, I13.9, K76.1, J81 related to I50                                                                                                | I50                     | Specific medications approved for heart failure including beta-blockers (bisoprolol, carvedilol, metoprolol), eplerenone, bumetanide, furosemide when licensed for heart failure only |
| Antihypertensive drugs                                                                    |                                                                                                                                                             |                         | Diuretics, beta blockers, calcium channel blockers, agents acting on the renin-angiotensin system and other antiadrenergic agents                                                     |
| Diabetes                                                                                  | E10-E14                                                                                                                                                     | E10-E14                 | Insulins and blood glucose lowering drugs                                                                                                                                             |
| History of ATE (ischemic stroke, arterial systemic embolism or transient ischemic attack) | I63 (except I63.6), G46 related to I63 or I69.3; I74, G45 (except G45.4)                                                                                    | I63, I74, G45           |                                                                                                                                                                                       |
| Peripheral vascular disease                                                               | I20, I21, I22, I23, I24, I25, I70, I71, I72, I73, E10.5, E11.5, E12.5, E13.5, E14.5                                                                         | I70-I73, I20-I25        |                                                                                                                                                                                       |
| Abnormal renal function                                                                   | N18, I12.0, I13.1, I13.2, E10.2, E11.2, E13.2, E14.2, N08.3                                                                                                 | N18, I12                |                                                                                                                                                                                       |
| Abnormal liver function                                                                   | R18, I85, K70, K71.3, K71.4, K71.5, K71.7, K72.1, K73, K74, K76.1, B18, C22, C78.7                                                                          | K70, K73, K74, B18, C22 | Antiviral agents for systemic use HCV (ribavirin, [peg]interferon alpha and DAA), and against HCB ([peg]interferon alpha and NnRTIs).                                                 |
| Major bleeding                                                                            | I60-I62, S06.3-S06.6, I85, K25-K29, K62.5, K92, D62, N02, R31, R58, H11.3, H35.6, H43.1, H45.0, H92.2, J94.2, K66.1, M25.0, N92, N93.8, N93.9, N95.0, R04.0 |                         |                                                                                                                                                                                       |
| Predisposition for bleeding                                                               | Anemias : D50, D51, D52, D53, D55, D56, D57, D58, D59, D60, D62, D63, D64 or coagulation defects, purpura and other hemorrhagic: D65, D66, D67, D68, D69    |                         |                                                                                                                                                                                       |
| Alcohol abuse                                                                             | F10, K70, T51, K6, G31.2, G62.1, G72.1, I42.6, K29.2, Z71.4, Z72.1, Z50.2.                                                                                  |                         | disulfiram, acamprosate, nalmefene and products with naltrexone licensed in adult patients with alcohol dependence                                                                    |
| Drug-drug interaction                                                                     |                                                                                                                                                             |                         | Platelet aggregation inhibitors (including low-dose acetylsalicylic acid ), heparins, NSAIDs                                                                                          |
| <b>Other comorbidities</b>                                                                |                                                                                                                                                             |                         |                                                                                                                                                                                       |
| Ischemic heart disease (including myocardial infarction)                                  | I20-I25                                                                                                                                                     | I20-I25                 | Nitrovasodilator agents                                                                                                                                                               |
| Frailty                                                                                   | G81-G83                                                                                                                                                     | G81-G83                 | Home hospital bed, wheelchair, high level of nursing home stay                                                                                                                        |
| Dementia or Parkinson's disease                                                           | F00-F03, G30, G20                                                                                                                                           | F00-F03, G30, G20       | Anticholinesterases or NMDA receptor antagonists: anticholinergic and dopaminergic agents                                                                                             |
| Psychiatric disorders                                                                     | F20-29, F30-39                                                                                                                                              | F20-29, F30-39          | Antidepressants, antipsychotics, conventional mood stabilizers                                                                                                                        |
| Smoking                                                                                   | F17, Z71.6, Z72.0; J43-J44                                                                                                                                  | J43-J44                 | Nicotine replacement therapy                                                                                                                                                          |
| Recently hospitalized for coagulopathy, purpura and other haemorrhagic conditions         | D65-D69                                                                                                                                                     |                         |                                                                                                                                                                                       |
| Liver fibrosis and cirrhosis                                                              | K70.0, K70.2, K70.3, K70.4, K71.7, K72, K74                                                                                                                 |                         |                                                                                                                                                                                       |

1  
2  
3  
4  
5  
6  
7  
8  
9  
10  
11  
12  
13  
14  
15  
16  
17  
18  
19  
20  
21  
22  
23  
24  
25  
26  
27  
28  
29  
30  
31  
32  
33  
34  
35  
36  
37  
38  
39  
40  
41  
42  
43  
44  
45  
46

|                                                                |                                                               |                  |                                                                         |
|----------------------------------------------------------------|---------------------------------------------------------------|------------------|-------------------------------------------------------------------------|
| Recent gastrointestinal ulceration or intracranial haemorrhage | K25, K26, K27, K28, K29.0, I60, I61, I62, S06.4, S06.5, S06.6 |                  |                                                                         |
| Recently or currently treated cancer                           | C00-D09, D37-D48, Z510, Z511                                  | C00-D09, D37-D48 | Radiotherapy procedures                                                 |
| <b>Baseline comedications</b>                                  |                                                               |                  |                                                                         |
| Antiarrhythmics and cardiac glycosides                         |                                                               |                  | Antiarrhythmics: class I and III, verapamil, digitalis glycosides       |
| Lipid-lowering agents                                          |                                                               |                  | HMG CoA reductase inhibitors, fibrates, ezetimibe                       |
| Antiplatelet drugs                                             |                                                               |                  | Platelet aggregation inhibitors including low-dose acetylsalicylic acid |
| Oral corticosteroids                                           |                                                               |                  | Mineralo- and gluco-corticoids                                          |
| Antiulcer agents                                               |                                                               |                  | Mainly proton pump inhibitors and H2-receptor antagonists               |

LTD: long-term diseases; ATE: arterial thromboembolic events (mainly stroke); DVT/PE: deep vein thrombosis/pulmonary embolism; NMDA: N-methyl-D-aspartate; HIV: human immunodeficiency virus; PI: Protease inhibitor; NNRTIs: Non-nucleoside reverse transcriptase inhibitors; NnRTI: Nucleoside and nucleotide reverse transcriptase inhibitors; DAA: direct-acting antiviral; HMG CoA: 3-hydroxy-3-methyl-glutaryl-CoA; NSAIDs: Non-steroidal anti-inflammatory drugs.

\* Comorbidities were identified using ICD-10 diagnosis codes for hospital discharge/LTD, or specific procedures, or drug reimbursements. Concomitant medications were identified as those dispensed at least once during the 4-month period preceding the index date. Influenza vaccination was determined during the first 'flu vaccination campaign preceding the index date.

†ICD-10 codes

**Supplementary Table 2. Age- and sex-adjusted association between baseline characteristics and the choice of NOAC therapy compared to VKA therapy in OAC new users.**

| Baseline characteristics                             | Dabigatran vs VKA |        |      |          | Rivaroxaban vs VKA |        |      | Apixaban vs VKA |      |        |      |          |
|------------------------------------------------------|-------------------|--------|------|----------|--------------------|--------|------|-----------------|------|--------|------|----------|
|                                                      | RR*               | 95% CI |      | p-value† | RR*                | 95% CI |      | p-value†        | RR*  | 95% CI |      | p-value† |
| <b>Female sex</b>                                    | 1.11              | 1.05   | 1.17 | ***      | 1.03               | 1.00   | 1.07 | *               | 1.07 | 1.04   | 1.09 | ***      |
| <b>Age (years)</b>                                   |                   |        |      |          |                    |        |      |                 |      |        |      |          |
| 18-54 (Ref)                                          | 1.00              | 1.00   | 1.00 |          | 1.00               | 1.00   | 1.00 |                 | 1.00 | 1.00   | 1.00 |          |
| 55-64                                                | 0.87              | 0.78   | 0.98 | *        | 0.92               | 0.87   | 0.97 | **              | 0.97 | 0.92   | 1.02 |          |
| 65-74                                                | 0.86              | 0.77   | 0.95 | **       | 0.89               | 0.84   | 0.94 | ***             | 0.98 | 0.93   | 1.03 |          |
| 75-79                                                | 0.73              | 0.65   | 0.81 | ***      | 0.77               | 0.73   | 0.82 | ***             | 0.91 | 0.87   | 0.96 | ***      |
| 80-84                                                | 0.58              | 0.52   | 0.65 | ***      | 0.65               | 0.61   | 0.68 | ***             | 0.83 | 0.79   | 0.87 | ***      |
| 85-89                                                | 0.44              | 0.39   | 0.49 | ***      | 0.50               | 0.48   | 0.54 | ***             | 0.74 | 0.70   | 0.77 | ***      |
| >=90                                                 | 0.28              | 0.25   | 0.32 | ***      | 0.37               | 0.35   | 0.40 | ***             | 0.61 | 0.57   | 0.65 | ***      |
| <b>Deprivation index</b>                             |                   |        |      |          |                    |        |      |                 |      |        |      |          |
| quintile 1 (least deprived) (Ref)                    | 1.00              | 1.00   | 1.00 |          | 1.00               | 1.00   | 1.00 |                 | 1.00 | 1.00   | 1.00 |          |
| quintile 2                                           | 0.97              | 0.91   | 1.05 |          | 0.94               | 0.92   | 0.97 | ***             | 0.97 | 0.95   | 1.00 | *        |
| quintile 3                                           | 0.99              | 0.93   | 1.07 |          | 0.90               | 0.87   | 0.92 | ***             | 0.94 | 0.92   | 0.97 | ***      |
| quintile 4                                           | 0.96              | 0.89   | 1.03 |          | 0.85               | 0.83   | 0.87 | ***             | 0.90 | 0.88   | 0.93 | ***      |
| quintile 5 (most deprived)                           | 1.00              | 0.94   | 1.07 |          | 0.85               | 0.83   | 0.87 | ***             | 0.91 | 0.89   | 0.93 | ***      |
| Overseas departments                                 | 1.60              | 1.41   | 1.82 | ***      | 0.83               | 0.77   | 0.89 | ***             | 0.77 | 0.72   | 0.83 | ***      |
| <b>First prescriber's specialty</b>                  |                   |        |      |          |                    |        |      |                 |      |        |      |          |
| Hospital practitioner (Ref)                          | 1.00              | 1.00   | 1.00 |          | 1.00               | 1.00   | 1.00 |                 | 1.00 | 1.00   | 1.00 |          |
| General practitioner                                 | 1.37              | 1.29   | 1.46 | ***      | 1.16               | 1.10   | 1.23 | ***             | 1.00 | 0.96   | 1.04 |          |
| Private cardiologist                                 | 2.92              | 2.76   | 3.08 | ***      | 1.80               | 1.70   | 1.90 | ***             | 1.65 | 1.59   | 1.71 | ***      |
| Private orthopedic surgeon                           | 1.96              | 1.20   | 3.21 | **       | 1.48               | 1.20   | 1.81 | ***             | 1.32 | 1.07   | 1.61 | **       |
| Other private specialist                             | 1.07              | 0.93   | 1.24 |          | 1.12               | 1.04   | 1.21 | **              | 1.03 | 0.97   | 1.10 |          |
| <b>From CHA<sub>2</sub>DS<sub>2</sub>-VASc score</b> |                   |        |      |          |                    |        |      |                 |      |        |      |          |
| Heart Failure                                        | 0.52              | 0.49   | 0.54 | ***      | 0.70               | 0.68   | 0.71 | ***             | 0.77 | 0.75   | 0.78 | ***      |
| Antihypertensive drugs                               | 0.60              | 0.57   | 0.63 | ***      | 0.74               | 0.72   | 0.76 | ***             | 0.80 | 0.78   | 0.82 | ***      |
| Diabetes                                             | 0.67              | 0.63   | 0.71 | ***      | 0.76               | 0.74   | 0.77 | ***             | 0.80 | 0.79   | 0.82 | ***      |
| ATE                                                  | 0.85              | 0.79   | 0.92 | ***      | 0.71               | 0.68   | 0.74 | ***             | 0.90 | 0.88   | 0.92 | ***      |

1  
2  
3  
4  
5  
6  
7  
8  
9  
10  
11  
12  
13  
14  
15  
16  
17  
18  
19  
20  
21  
22  
23  
24  
25  
26  
27  
28  
29  
30  
31  
32  
33  
34  
35  
36  
37  
38  
39  
40  
41  
42  
43  
44  
45  
46

|                                       |      |      |      |     |      |      |      |     |      |      |      |     |
|---------------------------------------|------|------|------|-----|------|------|------|-----|------|------|------|-----|
| Vascular diseases                     | 0.47 | 0.42 | 0.53 | *** | 0.63 | 0.61 | 0.66 | *** | 0.71 | 0.67 | 0.74 | *** |
| <b>From HAS-BLED score</b>            |      |      |      |     |      |      |      |     |      |      |      |     |
| Abnormal renal function               | 0.17 | 0.15 | 0.19 | *** | 0.31 | 0.30 | 0.33 | *** | 0.40 | 0.38 | 0.42 | *** |
| Abnormal liver function               | 0.46 | 0.39 | 0.54 | *** | 0.58 | 0.54 | 0.62 | *** | 0.60 | 0.57 | 0.64 | *** |
| Bleeding predisposition               | 0.53 | 0.47 | 0.59 | *** | 0.63 | 0.60 | 0.65 | *** | 0.70 | 0.67 | 0.72 | *** |
| Major bleeding                        | 0.23 | 0.20 | 0.26 | *** | 0.36 | 0.33 | 0.39 | *** | 0.41 | 0.38 | 0.45 | *** |
| Alcohol abuse                         | 0.55 | 0.48 | 0.62 | *** | 0.69 | 0.65 | 0.72 | *** | 0.68 | 0.65 | 0.72 | *** |
| Drug-drug interactions                | 0.22 | 0.20 | 0.24 | *** | 0.36 | 0.34 | 0.37 | *** | 0.40 | 0.37 | 0.43 | *** |
| Parenteral anticoagulants             | 0.04 | 0.03 | 0.06 | *** | 0.07 | 0.06 | 0.07 | *** | 0.07 | 0.06 | 0.07 | *** |
| Antiplatelets drugs                   | 0.34 | 0.31 | 0.37 | *** | 0.49 | 0.47 | 0.51 | *** | 0.56 | 0.53 | 0.60 | *** |
| NSAIDs                                | 1.80 | 1.43 | 2.28 | *** | 1.24 | 1.12 | 1.38 | *** | 1.18 | 1.06 | 1.32 | **  |
| <b>Other comorbidities</b>            |      |      |      |     |      |      |      |     |      |      |      |     |
| Valvular heart diseases               | 0.25 | 0.20 | 0.31 | *** | 0.40 | 0.36 | 0.45 | *** | 0.47 | 0.41 | 0.54 | *** |
| Ischemic heart diseases               | 0.51 | 0.46 | 0.56 | *** | 0.65 | 0.63 | 0.67 | *** | 0.74 | 0.71 | 0.77 | *** |
| Frailty (proxies)                     | 0.48 | 0.45 | 0.51 | *** | 0.58 | 0.55 | 0.61 | *** | 0.64 | 0.62 | 0.66 | *** |
| Dementia or Parkinson's disease       | 0.66 | 0.60 | 0.72 | *** | 0.82 | 0.78 | 0.85 | *** | 0.77 | 0.75 | 0.80 | *** |
| Psychiatric disorders                 | 0.74 | 0.70 | 0.78 | *** | 0.86 | 0.84 | 0.88 | *** | 0.86 | 0.84 | 0.88 | *** |
| Smoking                               | 0.56 | 0.52 | 0.60 | *** | 0.71 | 0.69 | 0.74 | *** | 0.74 | 0.71 | 0.76 | *** |
| <b>Comedications</b>                  |      |      |      |     |      |      |      |     |      |      |      |     |
| Antiarrhythmics or cardiac glycosides | 1.42 | 1.35 | 1.50 | *** | 1.22 | 1.19 | 1.25 | *** | 1.18 | 1.16 | 1.20 | *** |
| Lipid-lowering agents                 | 0.76 | 0.71 | 0.81 | *** | 0.81 | 0.79 | 0.84 | *** | 0.90 | 0.87 | 0.92 | *** |
| Oral corticosteroids                  | 0.85 | 0.80 | 0.91 | *** | 0.94 | 0.91 | 0.97 | *** | 0.94 | 0.91 | 0.96 | *** |
| Antiulcer agents                      | 0.61 | 0.56 | 0.66 | *** | 0.73 | 0.71 | 0.75 | *** | 0.78 | 0.75 | 0.81 | *** |
| Polymedication (≥5 ATC classes)       | 0.37 | 0.35 | 0.40 | *** | 0.55 | 0.54 | 0.57 | *** | 0.60 | 0.59 | 0.62 | *** |
| Polymedication (≥10 ATC classes)      | 0.33 | 0.30 | 0.36 | *** | 0.49 | 0.46 | 0.52 | *** | 0.54 | 0.51 | 0.57 | *** |

NOAC: Non vitamin K antagonist oral anticoagulant; VKA: vitamin K antagonist; OAC: oral anticoagulant; RR: Relative risk; IC: Confidence interval; ATE: arterial thromboembolic events (ischaemic stroke, arterial systemic embolism or transient ischaemic attack); NSAIDs: non-steroidal anti-inflammatory drugs  
 \* RR determined using negative binomial regression analysis adjusting for age and sex(except for age and sex covariates, adjusted for sex and for age only, respectively).  
 † p-values : \*\*\*  $p < 0,001$  ; \*\*  $p < 0,01$  ; \*  $p < 0,05$   
 Reading example: Age and sex being equal, frailty reduced the probability for a prescription of dabigatran (instead of VKA) by 52% (1 minus the estimated RR of 0.48). For rivaroxaban and apixaban, this reduction was 42% and 36%, respectively.

**Supplementary Table 3. Comparison of selected baseline characteristics of DOAC new users with AF at risk of stroke according to level of HAS-BLED score and type of DOAC dose.**

| N (%)                                         | Patients with CHA2DS2-VASc $\geq 2$ (N=116,391) |                               |                              |                               | Patients aged $\geq 75$ years old and history of ATE (N=9,503) |                              |                             |                            |
|-----------------------------------------------|-------------------------------------------------|-------------------------------|------------------------------|-------------------------------|----------------------------------------------------------------|------------------------------|-----------------------------|----------------------------|
|                                               | HAS-BLED $\geq 3$ (N=30 273)                    |                               | HAS-BLED $<3$ (N=86 118)     |                               | HAS-BLED $\geq 3$ (N=7,143)                                    |                              | HAS-BLED $<3$ (N=2,360)     |                            |
|                                               | Reduced doses*<br>(N=16,090)                    | Standard doses*<br>(N=14,183) | Reduced doses*<br>(N=33,845) | Standard doses*<br>(N=52,273) | Reduced doses*<br>(N=4,178)                                    | Standard doses*<br>(N=2,965) | Reduced doses*<br>(N=1,379) | Standard doses*<br>(N=981) |
| Age (years), mean                             | 81.8                                            | 74.8                          | 81.3                         | 70.9                          | 84.8                                                           | 81.1                         | 81.3                        | 70.9                       |
| Age $\geq 80$ years                           | 10,786 (67.0)                                   | 3,982 (28.1)                  | 22,962 (67.8)                | 9,984 (19.1)                  | 3,496 (83.7)                                                   | 1,720 (58.0)                 | 1,188 (86.1)                | 567 (57.8)                 |
| First prescriber's specialty                  |                                                 |                               |                              |                               |                                                                |                              |                             |                            |
| Hospital practitioner or private cardiologist | 12,315 (76.6)                                   | 11,364 (80.1)                 | 25,221 (74.5)                | 41,728 (79.8)                 | 3216 (77.0)                                                    | 2965 (80.2)                  | 1013 (73.5)                 | 798 (81.3)                 |
| General practitioner                          | 3321 (20.6)                                     | 2426 (17.1)                   | 7836 (23.2)                  | 9302 (17.8)                   | 860 (20.6)                                                     | 503 (17.0)                   | 322 (23.4)                  | 157 (16.0)                 |
| Frailty (proxies)                             | 6,689 (41.6)                                    | 4,600 (32.4)                  | 6,932 (20.5)                 | 4,779 (9.1)                   | 2,599 (62.2)                                                   | 1,642 (55.4)                 | 589 (42.7)                  | 316 (32.2)                 |
| Dementia or Parkinson's disease               | 2121 (13.2)                                     | 935 (6.6)                     | 3169 (9.4)                   | 1555 (3.0)                    | 789 (18.9)                                                     | 355 (12.0)                   | 259 (18.8)                  | 111 (11.3)                 |
| Any valvular diseases†                        | 2,640 (16.4)                                    | 1,809 (12.8)                  | 2,740 (8.1)                  | 3,342 (6.4)                   | 566 (13.5)                                                     | 330 (11.1)                   | 144 (10.4)                  | 95 (9.7)                   |
| Prosthetic heart valve†                       | 544 (3.4)                                       | 384 (2.7)                     | 425 (1.3)                    | 474 (0.9)                     | 94 (2.2)                                                       | 52 (1.8)                     | 19 (1.4)                    | 14 (1.4)                   |
| Ischaemic heart disease                       | 7,232 (44.9)                                    | 5,274 (37.2)                  | 6,827 (20.2)                 | 9,142 (17.5)                  | 1,338 (32.0)                                                   | 758 (25.6)                   | 336 (24.4)                  | 185 (18.9)                 |
| Antiplatelet agents at initiation             | 6,035 (37.5)                                    | 4,891 (34.5)                  | 620 (1.8)                    | 1,264 (2.4)                   | 874 (20.9)                                                     | 510 (17.2)                   | 11 (0.8)                    | 7 (0.7)                    |
| Lipid-lowering agents                         | 9252 (57.5)                                     | 9213 (65.0)                   | 12836 (37.9)                 | 21820 (41.7)                  | 2606 (62.4)                                                    | 2132 (71.9)                  | 697 (50.5)                  | 611 (62.3)                 |
| Polymedication ( $\geq 10$ ATC classes)       | 3,627 (22.5)                                    | 2,946 (20.8)                  | 2,150 (6.4)                  | 2,798 (5.4)                   | 788 (18.9)                                                     | 473 (16.0)                   | 104 (7.5)                   | 67 (6.8)                   |

\* Reduced-dose DOAC: dabigatran 150mg, Rivaroxaban 20 and apixaban 5mg; reduced-dose DOAC: dabigatran 75mg and 110mg, rivaroxaban 10mg and 15mg and apixaban 2.5mg

† Covariates defined by hospitalization data only



## STROBE Statement—checklist of items that should be included in reports of observational studies

|                              | Item No | Recommendation                                                                                                                                                                                                                                                                                                                                                                                                                                                         | Page No  |
|------------------------------|---------|------------------------------------------------------------------------------------------------------------------------------------------------------------------------------------------------------------------------------------------------------------------------------------------------------------------------------------------------------------------------------------------------------------------------------------------------------------------------|----------|
| <b>Title and abstract</b>    | 1       | (a) Indicate the study's design with a commonly used term in the title or the abstract                                                                                                                                                                                                                                                                                                                                                                                 | 1        |
|                              |         | (b) Provide in the abstract an informative and balanced summary of what was done and what was found                                                                                                                                                                                                                                                                                                                                                                    | 2        |
| <b>Introduction</b>          |         |                                                                                                                                                                                                                                                                                                                                                                                                                                                                        |          |
| Background/rationale         | 2       | Explain the scientific background and rationale for the investigation being reported                                                                                                                                                                                                                                                                                                                                                                                   | 4        |
| Objectives                   | 3       | State specific objectives, including any prespecified hypotheses                                                                                                                                                                                                                                                                                                                                                                                                       | 4        |
| <b>Methods</b>               |         |                                                                                                                                                                                                                                                                                                                                                                                                                                                                        |          |
| Study design                 | 4       | Present key elements of study design early in the paper                                                                                                                                                                                                                                                                                                                                                                                                                | 5,6      |
| Setting                      | 5       | Describe the setting, locations, and relevant dates, including periods of recruitment, exposure, follow-up, and data collection                                                                                                                                                                                                                                                                                                                                        | 5        |
| Participants                 | 6       | (a) <i>Cohort study</i> —Give the eligibility criteria, and the sources and methods of selection of participants. Describe methods of follow-up<br><i>Case-control study</i> —Give the eligibility criteria, and the sources and methods of case ascertainment and control selection. Give the rationale for the choice of cases and controls<br><i>Cross-sectional study</i> —Give the eligibility criteria, and the sources and methods of selection of participants | 5,6      |
|                              |         | (b) <i>Cohort study</i> —For matched studies, give matching criteria and number of exposed and unexposed<br><i>Case-control study</i> —For matched studies, give matching criteria and the number of controls per case                                                                                                                                                                                                                                                 | NA       |
| Variables                    | 7       | Clearly define all outcomes, exposures, predictors, potential confounders, and effect modifiers. Give diagnostic criteria, if applicable                                                                                                                                                                                                                                                                                                                               | 6        |
| Data sources/<br>measurement | 8*      | For each variable of interest, give sources of data and details of methods of assessment (measurement). Describe comparability of assessment methods if there is more than one group                                                                                                                                                                                                                                                                                   | 6,7,8    |
| Bias                         | 9       | Describe any efforts to address potential sources of bias                                                                                                                                                                                                                                                                                                                                                                                                              | 7,8      |
| Study size                   | 10      | Explain how the study size was arrived at                                                                                                                                                                                                                                                                                                                                                                                                                              | 9, Fig 2 |
| Quantitative variables       | 11      | Explain how quantitative variables were handled in the analyses. If applicable, describe which groupings were chosen and why                                                                                                                                                                                                                                                                                                                                           | 7        |
| Statistical methods          | 12      | (a) Describe all statistical methods, including those used to control for confounding                                                                                                                                                                                                                                                                                                                                                                                  | 7,8      |
|                              |         | (b) Describe any methods used to examine subgroups and interactions                                                                                                                                                                                                                                                                                                                                                                                                    | 7,8      |
|                              |         | (c) Explain how missing data were addressed                                                                                                                                                                                                                                                                                                                                                                                                                            | NA       |
|                              |         | (d) <i>Cohort study</i> —If applicable, explain how loss to follow-up was addressed<br><i>Case-control study</i> —If applicable, explain how matching of cases and controls was addressed<br><i>Cross-sectional study</i> —If applicable, describe analytical methods taking account of sampling strategy                                                                                                                                                              | NA       |
|                              |         | (e) Describe any sensitivity analyses                                                                                                                                                                                                                                                                                                                                                                                                                                  | 7,8      |

Continued on next page

| <b>Results</b>           |     |                                                                                                                                                                                                              |                     |
|--------------------------|-----|--------------------------------------------------------------------------------------------------------------------------------------------------------------------------------------------------------------|---------------------|
| Participants             | 13* | (a) Report numbers of individuals at each stage of study—eg numbers potentially eligible, examined for eligibility, confirmed eligible, included in the study, completing follow-up, and analysed            | 9<br>Fig 2          |
|                          |     | (b) Give reasons for non-participation at each stage                                                                                                                                                         | 9                   |
|                          |     | (c) Consider use of a flow diagram                                                                                                                                                                           | Fig 2               |
| Descriptive data         | 14* | (a) Give characteristics of study participants (eg demographic, clinical, social) and information on exposures and potential confounders                                                                     | Table 1             |
|                          |     | (b) Indicate number of participants with missing data for each variable of interest                                                                                                                          | NA                  |
|                          |     | (c) <i>Cohort study</i> —Summarise follow-up time (eg, average and total amount)                                                                                                                             | NA                  |
| Outcome data             | 15* | <i>Cohort study</i> —Report numbers of outcome events or summary measures over time                                                                                                                          | NA                  |
|                          |     | <i>Case-control study</i> —Report numbers in each exposure category, or summary measures of exposure                                                                                                         | NA                  |
|                          |     | <i>Cross-sectional study</i> —Report numbers of outcome events or summary measures                                                                                                                           | Fig 2, 3<br>Table 2 |
| Main results             | 16  | (a) Give unadjusted estimates and, if applicable, confounder-adjusted estimates and their precision (eg, 95% confidence interval). Make clear which confounders were adjusted for and why they were included | Table 2             |
|                          |     | (b) Report category boundaries when continuous variables were categorized                                                                                                                                    | Table 2             |
|                          |     | (c) If relevant, consider translating estimates of relative risk into absolute risk for a meaningful time period                                                                                             | NA                  |
| Other analyses           | 17  | Report other analyses done—eg analyses of subgroups and interactions, and sensitivity analyses                                                                                                               | 9, 10               |
| <b>Discussion</b>        |     |                                                                                                                                                                                                              |                     |
| Key results              | 18  | Summarise key results with reference to study objectives                                                                                                                                                     | 11                  |
| Limitations              | 19  | Discuss limitations of the study, taking into account sources of potential bias or imprecision. Discuss both direction and magnitude of any potential bias                                                   | 13                  |
| Interpretation           | 20  | Give a cautious overall interpretation of results considering objectives, limitations, multiplicity of analyses, results from similar studies, and other relevant evidence                                   | 11, 12              |
| Generalisability         | 21  | Discuss the generalisability (external validity) of the study results                                                                                                                                        | 12                  |
| <b>Other information</b> |     |                                                                                                                                                                                                              |                     |
| Funding                  | 22  | Give the source of funding and the role of the funders for the present study and, if applicable, for the original study on which the present article is based                                                | 14                  |

\*Give information separately for cases and controls in case-control studies and, if applicable, for exposed and unexposed groups in cohort and cross-sectional studies.

**Note:** An Explanation and Elaboration article discusses each checklist item and gives methodological background and published examples of transparent reporting. The STROBE checklist is best used in conjunction with this article (freely available on the Web sites of PLoS Medicine at <http://www.plosmedicine.org/>, Annals of Internal Medicine at <http://www.annals.org/>, and Epidemiology at <http://www.epidem.com/>). Information on the STROBE Initiative is available at [www.strobe-statement.org](http://www.strobe-statement.org).
