# Supplementary material for: Oral anticoagulation therapy use in patients with atrial fibrillation after the introduction of non-vitamin K antagonist oral anticoagulants: findings from the French healthcare databases, 2011–2016
Source: PubMed Central journal article supplement — BMJ Open. 2019 Apr 20;9(4):e026645. doi: 10.1136/bmjopen-2018-026645 (PMC6500377; doi:10.1136/bmjopen-2018-026645), 2019-04-20
Supplement: bmjopen-2018-026645supp001.pdf [file bmjopen-2018-026645supp001.pdf]

## **Supplementary Materials**

Supplementary Table 1. Definitions used to identify comorbid conditions and comedications in the French healthcare databases.

Supplementary Table 2. Age- and sex-adjusted association between baseline characteristics and the choice of NOAC therapy compared to VKA therapy in OAC new users.

Supplementary Table 3. Comparison of selected baseline characteristics of DOAC new users with AF at risk of stroke according to level of HAS-BLED score and type of DOAC dose.

**Supplementary Table 1. Definitions used to identify comorbid conditions and comedications in the SNIIRAM-PMSI databases.**

| Covariates*                                                                               | Hospital discharge diagnoses†                                                                                                                               | LTD diagnoses†          | Specific procedures or drug reimbursements                                                                                                                                            |
|-------------------------------------------------------------------------------------------|-------------------------------------------------------------------------------------------------------------------------------------------------------------|-------------------------|---------------------------------------------------------------------------------------------------------------------------------------------------------------------------------------|
| <b>AF definition (Patterns of use of DOAC therapy in new users with AF)</b>               |                                                                                                                                                             |                         |                                                                                                                                                                                       |
| Nonvalvular atrial fibrillation                                                           | I48                                                                                                                                                         | I48                     | Radiofrequency ablation, cardioversion                                                                                                                                                |
| Lower limb orthopaedic procedures                                                         |                                                                                                                                                             |                         | Lower limb orthopaedic surgery or procedures                                                                                                                                          |
| History of valvular heart disease/Prosthetic heart valve                                  | I05-I09, I33-I39/ Z95.2, Z95.3 ou Z95.4                                                                                                                     |                         | Heart valve surgery                                                                                                                                                                   |
| Deep vein thrombosis/pulmonary embolism                                                   | I26, I80 (except I80.0), I81, I82                                                                                                                           | I26, I80-I82            | Lower limb venous ultrasonography, pulmonary/lower limb angiography, ventilation/perfusion scan                                                                                       |
| <b>CHA<sub>2</sub>DS<sub>2</sub>-VASc and HAS-BLED scores</b>                             |                                                                                                                                                             |                         |                                                                                                                                                                                       |
| Heart failure                                                                             | I50 or I11.0, I13.0, I13.2, I13.9, K76.1, J81 related to I50                                                                                                | I50                     | Specific medications approved for heart failure including beta-blockers (bisoprolol, carvedilol, metoprolol), eplerenone, bumetanide, furosemide when licensed for heart failure only |
| Antihypertensive drugs                                                                    |                                                                                                                                                             |                         | Diuretics, beta blockers, calcium channel blockers, agents acting on the renin-angiotensin system and other antiadrenergic agents                                                     |
| Diabetes                                                                                  | E10-E14                                                                                                                                                     | E10-E14                 | Insulins and blood glucose lowering drugs                                                                                                                                             |
| History of ATE (ischemic stroke, arterial systemic embolism or transient ischemic attack) | I63 (except I63.6), G46 related to I63 or I69.3; I74, G45 (except G45.4)                                                                                    | I63, I74, G45           |                                                                                                                                                                                       |
| Peripheral vascular disease                                                               | I20, I21, I22, I23, I24, I25, I70, I71, I72, I73, E10.5, E11.5, E12.5, E13.5, E14.5                                                                         | I70-I73 , I20-I25       |                                                                                                                                                                                       |
| Abnormal renal function                                                                   | N18, I12.0, I13.1, I13.2, E10.2, E11.2, E13.2, E14.2, N08.3                                                                                                 | N18, I12                |                                                                                                                                                                                       |
| Abnormal liver function                                                                   | R18, I85, K70, K71.3, K71.4, K71.5, K71.7, K72.1, K73, K74, K76.1, B18, C22, C78.7                                                                          | K70, K73, K74, B18, C22 | Antiviral agents for systemic use HCV (ribavirin, [peg]interferon alpha and DAA), and against HCB ([peg]interferon alpha and NnRTIs).                                                 |
| Major bleeding                                                                            | I60-I62, S06.3-S06.6, I85, K25-K29, K62.5, K92, D62, N02, R31, R58, H11.3, H35.6, H43.1, H45.0, H92.2, J94.2, K66.1, M25.0, N92, N93.8, N93.9, N95.0, R04.0 |                         |                                                                                                                                                                                       |
| Predisposition for bleeding                                                               | Anemias : D50, D51, D52, D53, D55, D56, D57, D58, D59, D60, D62, D63, D64 or coagulation defects, purpura and other hemorrhagic: D65, D66, D67, D68, D69    |                         |                                                                                                                                                                                       |
| Alcohol abuse                                                                             | F10, K70, T51, K6, G31.2, G62.1, G72.1, I42.6, K29.2, Z71.4, Z72.1, Z50.2.                                                                                  |                         | disulfiram, acamprosate, nalmefene and products with naltrexone licensed in adult patients with alcohol dependence                                                                    |
| Drug-drug interaction                                                                     |                                                                                                                                                             |                         | Platelet aggregation inhibitors (including low-dose acetylsalicylic acid ), heparins, NSAIDs                                                                                          |
| <b>Other comorbidities</b>                                                                |                                                                                                                                                             |                         |                                                                                                                                                                                       |
| Ischemic heart disease (including myocardial infarction)                                  | I20-I25                                                                                                                                                     | I20-I25                 | Nitrovasodilator agents                                                                                                                                                               |
| Frailty                                                                                   | G81-G83                                                                                                                                                     | G81-G83                 | Home hospital bed, wheelchair, high level of nursing home stay                                                                                                                        |
| Dementia or Parkinson's disease                                                           | F00-F03, G30, G20                                                                                                                                           | F00-F03, G30, G20       | Anticholinesterases or NMDA receptor antagonists: anticholinergic and dopaminergic agents                                                                                             |
| Psychiatric disorders                                                                     | F20-29, F30-39                                                                                                                                              | F20-29, F30-39          | Antidepressants, antipsychotics, conventional mood stabilizers                                                                                                                        |
| Smoking                                                                                   | F17, Z71.6, Z72.0; J43-J44                                                                                                                                  | J43-J44                 | Nicotine replacement therapy                                                                                                                                                          |
| Recently hospitalized for coagulopathy, purpura and other haemorrhagic conditions         | D65-D69                                                                                                                                                     |                         |                                                                                                                                                                                       |
| Liver fibrosis and cirrhosis                                                              | K70.0, K70.2, K70.3, K70.4, K71.7, K72, K74                                                                                                                 |                         |                                                                                                                                                                                       |

|                                                                |                                                               |                  |                                                                         |
|----------------------------------------------------------------|---------------------------------------------------------------|------------------|-------------------------------------------------------------------------|
| Recent gastrointestinal ulceration or intracranial haemorrhage | K25, K26, K27, K28, K29.0, I60, I61, I62, S06.4, S06.5, S06.6 |                  |                                                                         |
| Recently or currently treated cancer                           | C00-D09, D37-D48, Z510, Z511                                  | C00-D09, D37-D48 | Radiotherapy procedures                                                 |
| <b>Baseline comedications</b>                                  |                                                               |                  |                                                                         |
| Antiarrhythmics and cardiac glycosides                         |                                                               |                  | Antiarrhythmics: class I and III, verapamil, digitalis glycosides       |
| Lipid-lowering agents                                          |                                                               |                  | HMG CoA reductase inhibitors, fibrates, ezetimibe                       |
| Antiplatelet drugs                                             |                                                               |                  | Platelet aggregation inhibitors including low-dose acetylsalicylic acid |
| Oral corticosteroids                                           |                                                               |                  | Mineralo- and gluco-corticoids                                          |
| Antiulcer agents                                               |                                                               |                  | Mainly proton pump inhibitors and H2-receptor antagonists               |

LTD: long-term diseases; ATE: arterial thromboembolic events (mainly stroke); DVT/PE: deep vein thrombosis/pulmonary embolism; NMDA: N-methyl-D-aspartate; HIV: human immunodeficiency virus; PI: Protease inhibitor; NNRTIs: Non-nucleoside reverse transcriptase inhibitors; NnRTI: Nucleoside and nucleotide reverse transcriptase inhibitors; DAA: direct-acting antiviral; HMG CoA: 3-hydroxy-3-methyl-glutaryl-CoA; NSAIDs: Non-steroidal anti-inflammatory drugs.

\* Comorbidities were identified using ICD-10 diagnosis codes for hospital discharge/LTD, or specific procedures, or drug reimbursements. Concomitant medications were identified as those dispensed at least once during the 4-month period preceding the index date. Influenza vaccination was determined during the first 'flu vaccination campaign preceding the index date.

†ICD-10 codes

**Supplementary Table 2. Age- and sex-adjusted association between baseline characteristics and the choice of NOAC therapy compared to VKA therapy in OAC new users.**

| Baseline characteristics                             | Dabigatran vs VKA |        |          | Rivaroxaban vs VKA |        |          | Apixaban vs VKA |        |          |      |      |     |
|------------------------------------------------------|-------------------|--------|----------|--------------------|--------|----------|-----------------|--------|----------|------|------|-----|
|                                                      | RR*               | 95% CI | p-value† | RR*                | 95% CI | p-value† | RR*             | 95% CI | p-value† |      |      |     |
| <b>Female sex</b>                                    | 1.11              | 1.05   | 1.17     | ***                | 1.03   | 1.00     | 1.07            | *      | 1.07     | 1.04 | 1.09 | *** |
| <b>Age (years)</b>                                   |                   |        |          |                    |        |          |                 |        |          |      |      |     |
| 18-54 (Ref)                                          | 1.00              | 1.00   | 1.00     |                    | 1.00   | 1.00     | 1.00            |        | 1.00     | 1.00 | 1.00 |     |
| 55-64                                                | 0.87              | 0.78   | 0.98     | *                  | 0.92   | 0.87     | 0.97            | **     | 0.97     | 0.92 | 1.02 |     |
| 65-74                                                | 0.86              | 0.77   | 0.95     | **                 | 0.89   | 0.84     | 0.94            | ***    | 0.98     | 0.93 | 1.03 |     |
| 75-79                                                | 0.73              | 0.65   | 0.81     | ***                | 0.77   | 0.73     | 0.82            | ***    | 0.91     | 0.87 | 0.96 | *** |
| 80-84                                                | 0.58              | 0.52   | 0.65     | ***                | 0.65   | 0.61     | 0.68            | ***    | 0.83     | 0.79 | 0.87 | *** |
| 85-89                                                | 0.44              | 0.39   | 0.49     | ***                | 0.50   | 0.48     | 0.54            | ***    | 0.74     | 0.70 | 0.77 | *** |
| >=90                                                 | 0.28              | 0.25   | 0.32     | ***                | 0.37   | 0.35     | 0.40            | ***    | 0.61     | 0.57 | 0.65 | *** |
| <b>Deprivation index</b>                             |                   |        |          |                    |        |          |                 |        |          |      |      |     |
| quintile 1 (least deprived) (Ref)                    | 1.00              | 1.00   | 1.00     |                    | 1.00   | 1.00     | 1.00            |        | 1.00     | 1.00 | 1.00 |     |
| quintile 2                                           | 0.97              | 0.91   | 1.05     |                    | 0.94   | 0.92     | 0.97            | ***    | 0.97     | 0.95 | 1.00 | *   |
| quintile 3                                           | 0.99              | 0.93   | 1.07     |                    | 0.90   | 0.87     | 0.92            | ***    | 0.94     | 0.92 | 0.97 | *** |
| quintile 4                                           | 0.96              | 0.89   | 1.03     |                    | 0.85   | 0.83     | 0.87            | ***    | 0.90     | 0.88 | 0.93 | *** |
| quintile 5 (most deprived)                           | 1.00              | 0.94   | 1.07     |                    | 0.85   | 0.83     | 0.87            | ***    | 0.91     | 0.89 | 0.93 | *** |
| Overseas departments                                 | 1.60              | 1.41   | 1.82     | ***                | 0.83   | 0.77     | 0.89            | ***    | 0.77     | 0.72 | 0.83 | *** |
| <b>First prescriber's specialty</b>                  |                   |        |          |                    |        |          |                 |        |          |      |      |     |
| Hospital practitioner (Ref)                          | 1.00              | 1.00   | 1.00     |                    | 1.00   | 1.00     | 1.00            |        | 1.00     | 1.00 | 1.00 |     |
| General practitioner                                 | 1.37              | 1.29   | 1.46     | ***                | 1.16   | 1.10     | 1.23            | ***    | 1.00     | 0.96 | 1.04 |     |
| Private cardiologist                                 | 2.92              | 2.76   | 3.08     | ***                | 1.80   | 1.70     | 1.90            | ***    | 1.65     | 1.59 | 1.71 | *** |
| Private orthopedic surgeon                           | 1.96              | 1.20   | 3.21     | **                 | 1.48   | 1.20     | 1.81            | ***    | 1.32     | 1.07 | 1.61 | **  |
| Other private specialist                             | 1.07              | 0.93   | 1.24     |                    | 1.12   | 1.04     | 1.21            | **     | 1.03     | 0.97 | 1.10 |     |
| <b>From CHA<sub>2</sub>DS<sub>2</sub>-VASc score</b> |                   |        |          |                    |        |          |                 |        |          |      |      |     |
| Heart Failure                                        | 0.52              | 0.49   | 0.54     | ***                | 0.70   | 0.68     | 0.71            | ***    | 0.77     | 0.75 | 0.78 | *** |
| Antihypertensive drugs                               | 0.60              | 0.57   | 0.63     | ***                | 0.74   | 0.72     | 0.76            | ***    | 0.80     | 0.78 | 0.82 | *** |
| Diabetes                                             | 0.67              | 0.63   | 0.71     | ***                | 0.76   | 0.74     | 0.77            | ***    | 0.80     | 0.79 | 0.82 | *** |
| ATE                                                  | 0.85              | 0.79   | 0.92     | ***                | 0.71   | 0.68     | 0.74            | ***    | 0.90     | 0.88 | 0.92 | *** |

|                                       |      |      |      |     |      |      |      |     |      |      |      |     |
|---------------------------------------|------|------|------|-----|------|------|------|-----|------|------|------|-----|
| Vascular diseases                     | 0.47 | 0.42 | 0.53 | *** | 0.63 | 0.61 | 0.66 | *** | 0.71 | 0.67 | 0.74 | *** |
| <b>From HAS-BLED score</b>            |      |      |      |     |      |      |      |     |      |      |      |     |
| Abnormal renal function               | 0.17 | 0.15 | 0.19 | *** | 0.31 | 0.30 | 0.33 | *** | 0.40 | 0.38 | 0.42 | *** |
| Abnormal liver function               | 0.46 | 0.39 | 0.54 | *** | 0.58 | 0.54 | 0.62 | *** | 0.60 | 0.57 | 0.64 | *** |
| Bleeding predisposition               | 0.53 | 0.47 | 0.59 | *** | 0.63 | 0.60 | 0.65 | *** | 0.70 | 0.67 | 0.72 | *** |
| Major bleeding                        | 0.23 | 0.20 | 0.26 | *** | 0.36 | 0.33 | 0.39 | *** | 0.41 | 0.38 | 0.45 | *** |
| Alcohol abuse                         | 0.55 | 0.48 | 0.62 | *** | 0.69 | 0.65 | 0.72 | *** | 0.68 | 0.65 | 0.72 | *** |
| Drug-drug interactions                | 0.22 | 0.20 | 0.24 | *** | 0.36 | 0.34 | 0.37 | *** | 0.40 | 0.37 | 0.43 | *** |
| Parenteral anticoagulants             | 0.04 | 0.03 | 0.06 | *** | 0.07 | 0.06 | 0.07 | *** | 0.07 | 0.06 | 0.07 | *** |
| Antiplatelets drugs                   | 0.34 | 0.31 | 0.37 | *** | 0.49 | 0.47 | 0.51 | *** | 0.56 | 0.53 | 0.60 | *** |
| NSAIDs                                | 1.80 | 1.43 | 2.28 | *** | 1.24 | 1.12 | 1.38 | *** | 1.18 | 1.06 | 1.32 | **  |
| <b>Other comorbidities</b>            |      |      |      |     |      |      |      |     |      |      |      |     |
| Valvular heart diseases               | 0,25 | 0,20 | 0,31 | *** | 0,40 | 0,36 | 0,45 | *** | 0,47 | 0,41 | 0,54 | *** |
| Ischemic heart diseases               | 0.51 | 0.46 | 0.56 | *** | 0.65 | 0.63 | 0.67 | *** | 0.74 | 0.71 | 0.77 | *** |
| Frailty (proxies)                     | 0.48 | 0.45 | 0.51 | *** | 0.58 | 0.55 | 0.61 | *** | 0.64 | 0.62 | 0.66 | *** |
| Dementia or Parkinson's disease       | 0.66 | 0.60 | 0.72 | *** | 0.82 | 0.78 | 0.85 | *** | 0.77 | 0.75 | 0.80 | *** |
| Psychiatric disorders                 | 0.74 | 0.70 | 0.78 | *** | 0.86 | 0.84 | 0.88 | *** | 0.86 | 0.84 | 0.88 | *** |
| Smoking                               | 0.56 | 0.52 | 0.60 | *** | 0.71 | 0.69 | 0.74 | *** | 0.74 | 0.71 | 0.76 | *** |
| <b>Comedications</b>                  |      |      |      |     |      |      |      |     |      |      |      |     |
| Antiarrhythmics or cardiac glycosides | 1.42 | 1.35 | 1.50 | *** | 1.22 | 1.19 | 1.25 | *** | 1.18 | 1.16 | 1.20 | *** |
| Lipid-lowering agents                 | 0.76 | 0.71 | 0.81 | *** | 0.81 | 0.79 | 0.84 | *** | 0.90 | 0.87 | 0.92 | *** |
| Oral corticosteroids                  | 0.85 | 0.80 | 0.91 | *** | 0.94 | 0.91 | 0.97 | *** | 0.94 | 0.91 | 0.96 | *** |
| Antiulcer agents                      | 0.61 | 0.56 | 0.66 | *** | 0.73 | 0.71 | 0.75 | *** | 0.78 | 0.75 | 0.81 | *** |
| Polymedication (≥5 ATC classes)       | 0.37 | 0.35 | 0.40 | *** | 0.55 | 0.54 | 0.57 | *** | 0.60 | 0.59 | 0.62 | *** |
| Polymedication (≥10 ATC classes)      | 0.33 | 0.30 | 0.36 | *** | 0.49 | 0.46 | 0.52 | *** | 0.54 | 0.51 | 0.57 | *** |

NOAC: Non vitamin K antagonist oral anticoagulant; VKA: vitamin K antagonist; OAC: oral anticoagulant; RR: Relative risk; IC: Confidence interval; ATE: arterial thromboembolic events (ischaemic stroke, arterial systemic embolism or transient ischaemic attack); NSAIDs: non-steroidal anti-inflammatory drugs

\* RR determined using negative binomial regression analysis adjusting for age and sex(except for age and sex covariates, adjusted for sex and for age only, respectively).

† p-values : \*\*\*  $p < 0,001$  ; \*\*  $p < 0,01$  ; \*  $p < 0,05$

Reading example: Age and sex being equal, frailty reduced the probability for a prescription of dabigatran (instead of VKA) by 52% (1 minus the estimated RR of 0.48). For rivaroxaban and apixaban, this reduction was 42% and 36%, respectively.

**Supplementary Table 3. Comparison of selected baseline characteristics of DOAC new users with AF at risk of stroke according to level of HAS-BLED score and type of DOAC dose.**

| N (%)                                         | Patients with CHA2DS2-VASc $\geq 2$ (N=116,391) |                               |                              |                               | Patients aged $\geq 75$ years old and history of ATE (N=9,503) |                              |                             |                            |
|-----------------------------------------------|-------------------------------------------------|-------------------------------|------------------------------|-------------------------------|----------------------------------------------------------------|------------------------------|-----------------------------|----------------------------|
|                                               | HAS-BLED $\geq 3$ (N=30 273)                    |                               | HAS-BLED $<3$ (N=86 118)     |                               | HAS-BLED $\geq 3$ (N=7,143)                                    |                              | HAS-BLED $<3$ (N=2,360)     |                            |
|                                               | Reduced doses*<br>(N=16,090)                    | Standard doses*<br>(N=14,183) | Reduced doses*<br>(N=33,845) | Standard doses*<br>(N=52,273) | Reduced doses*<br>(N=4,178)                                    | Standard doses*<br>(N=2,965) | Reduced doses*<br>(N=1,379) | Standard doses*<br>(N=981) |
| Age (years), mean                             | 81.8                                            | 74.8                          | 81.3                         | 70.9                          | 84.8                                                           | 81.1                         | 81.3                        | 70.9                       |
| Age $\geq 80$ years                           | 10,786 (67.0)                                   | 3,982 (28.1)                  | 22,962 (67.8)                | 9,984 (19.1)                  | 3,496 (83.7)                                                   | 1,720 (58.0)                 | 1,188 (86.1)                | 567 (57.8)                 |
| First prescriber's specialty                  |                                                 |                               |                              |                               |                                                                |                              |                             |                            |
| Hospital practitioner or private cardiologist | 12,315 (76.6)                                   | 11,364 (80.1)                 | 25,221 (74.5)                | 41,728 (79.8)                 | 3216 (77.0)                                                    | 2965 (80.2)                  | 1013 (73.5)                 | 798 (81.3)                 |
| General practitioner                          | 3321 (20.6)                                     | 2426 (17.1)                   | 7836 (23.2)                  | 9302 (17.8)                   | 860 (20.6)                                                     | 503 (17.0)                   | 322 (23.4)                  | 157 (16.0)                 |
| Frailty (proxies)                             | 6,689 (41.6)                                    | 4,600 (32.4)                  | 6,932 (20.5)                 | 4,779 (9.1)                   | 2,599 (62.2)                                                   | 1,642 (55.4)                 | 589 (42.7)                  | 316 (32.2)                 |
| Dementia or Parkinson's disease               | 2121 (13.2)                                     | 935 (6.6)                     | 3169 (9.4)                   | 1555 (3.0)                    | 789 (18.9)                                                     | 355 (12.0)                   | 259 (18.8)                  | 111 (11.3)                 |
| Any valvular diseases†                        | 2,640 (16.4)                                    | 1,809 (12.8)                  | 2,740 (8.1)                  | 3,342 (6.4)                   | 566 (13.5)                                                     | 330 (11.1)                   | 144 (10.4)                  | 95 (9.7)                   |
| Prosthetic heart valve†                       | 544 (3.4)                                       | 384 (2.7)                     | 425 (1.3)                    | 474 (0.9)                     | 94 (2.2)                                                       | 52 (1.8)                     | 19 (1.4)                    | 14 (1.4)                   |
| Ischaemic heart disease                       | 7,232 (44.9)                                    | 5,274 (37.2)                  | 6,827 (20.2)                 | 9,142 (17.5)                  | 1,338 (32.0)                                                   | 758 (25.6)                   | 336 (24.4)                  | 185 (18.9)                 |
| Antiplatelet agents at initiation             | 6,035 (37.5)                                    | 4,891 (34.5)                  | 620 (1.8)                    | 1,264 (2.4)                   | 874 (20.9)                                                     | 510 (17.2)                   | 11 (0.8)                    | 7 (0.7)                    |
| Lipid-lowering agents                         | 9252 (57.5)                                     | 9213 (65.0)                   | 12836 (37.9)                 | 21820 (41.7)                  | 2606 (62.4)                                                    | 2132 (71.9)                  | 697 (50.5)                  | 611 (62.3)                 |
| Polymedication ( $\geq 10$ ATC classes)       | 3,627 (22.5)                                    | 2,946 (20.8)                  | 2,150 (6.4)                  | 2,798 (5.4)                   | 788 (18.9)                                                     | 473 (16.0)                   | 104 (7.5)                   | 67 (6.8)                   |

\* Reduced-dose DOAC: dabigatran 150mg, Rivaroxaban 20 and apixaban 5mg; reduced-dose DOAC: dabigatran 75mg and 110mg, rivaroxaban 10mg and 15mg and apixaban 2.5mg

† Covariates defined by hospitalization data only
